# Supplementary material for: Insights into the Mechanism of Carbon Dioxide and Propylene Oxide Ring-Opening Copolymerization Using a Co(III)/K(I) Heterodinuclear Catalyst
Source: PubMed Central journal article supplement (PMC9545154; doi:10.1021/jacs.2c06921), 2022-09-21
Supplement: ja2c06921_si_001.pdf [file ja2c06921_si_001.pdf]

## Supporting Information

### Insights into the Mechanism of Carbon Dioxide and Propylene Oxide Ring Opening Copolymerization using a Co(III)/K(I) Heterodinuclear Catalyst.

Arron C. Deacy,<sup>†</sup> Andreas Phanopoulos,<sup>†</sup> Wouter Lindeboom, Antoine Buchard and Charlotte K. Williams\*

|                                                                                                                                                                                                                                                                                                                                                                                                                                                                                                                                                                                                                  |   |
|------------------------------------------------------------------------------------------------------------------------------------------------------------------------------------------------------------------------------------------------------------------------------------------------------------------------------------------------------------------------------------------------------------------------------------------------------------------------------------------------------------------------------------------------------------------------------------------------------------------|---|
| Experimental .....                                                                                                                                                                                                                                                                                                                                                                                                                                                                                                                                                                                               | 3 |
| <b>Table S1:</b> Depolymerization of PPC using Catalyst <b>1</b> under standard conditions. <sup>a</sup> .....                                                                                                                                                                                                                                                                                                                                                                                                                                                                                                   | 3 |
| a) Reaction Conditions: [cat] : [PPC] = 1 : 100 where [PPC] = 0.3 M in toluene. All reactions were run to completion as determined by in-situ IR monitoring. All reactions resulted in the depolymerization of PPC to PC where no polyether linkages were detected by <sup>1</sup> H NMR spectroscopy. ....                                                                                                                                                                                                                                                                                                      | 4 |
| Density Functional Theory Calculations.....                                                                                                                                                                                                                                                                                                                                                                                                                                                                                                                                                                      | 4 |
| <b>Figure S1:</b> a) Illustration of the Co(III)K(I) heterodinuclear catalyst <b>1</b> . b) illustration of the 'bowl'-shape conformation of the ligand resulting in 'concave' and 'convex' faces. c) ORTEP representation of the molecular structure of catalyst <b>1</b> obtained through single crystal X-ray diffraction. d) Illustration of the 'Z'-shape conformation of the ligand resulting in complexes with 'top' ( $\kappa_2$ -acetate) and 'bottom' ( $\kappa_1$ -acetate) faces. ....                                                                                                               | 5 |
| <b>Table S2:</b> Computed Free Gibbs Energies of the bowl and Z-shape conformations of <b>1</b> (without and with temperature and concentration corrections). <sup>a</sup> .....                                                                                                                                                                                                                                                                                                                                                                                                                                 | 5 |
| <b>Table S3:</b> Computed Free Gibbs Energies of the transition states for the first ring-opening of propylene oxide by <b>1</b> ( <b>TS1<sub>Co</sub></b> ; propylene oxide coordination at the cobalt center; without and with temperature and concentration corrections). <sup>a</sup> .....                                                                                                                                                                                                                                                                                                                  | 6 |
| <b>Table S4:</b> Computed Free Gibbs Energies of intermediates and transition states identified for the propagation step of the alternating copolymerization of R-propylene oxide (PO) and carbon dioxide using catalyst <b>1</b> , where PO coordination occurs at Co(III) (without and with temperature and concentration corrections). The starting point of the calculations is structure <b>1<sub>prop_Z</sub></b> , in which the ligand adopts a Z-shape conformation and one acetate ligand of <b>1</b> is replaced by one methyl carbonate ligand, modelling a growing polymer chain. <sup>a</sup> ..... | 6 |
| <b>Table S5:</b> Computed Free Gibbs Energies of intermediates and transition states identified for the propagation step of the alternating copolymerization of R-propylene oxide (PO) and carbon dioxide using catalyst <b>1</b> , where PO coordination occurs at K(I) (without and with temperature and concentration corrections). The starting point of the calculations is structure <b>1<sub>prop_Z</sub></b> , in which the ligand adopts a Z-shape conformation and one acetate ligand of <b>1</b> is replaced by one methyl carbonate ligand, modelling a growing polymer chain. <sup>a</sup> .....    | 7 |
| <b>Table S6:</b> Computed Free Gibbs Energies of <b>TS1<sub>Co</sub></b> and <b>TS1<sub>K</sub></b> transition states using various DFT functionals. (without and with temperature and concentration corrections). <sup>a</sup> .....                                                                                                                                                                                                                                                                                                                                                                            | 8 |
| <b>Table S7:</b> Computed Free Gibbs Energies of intermediates and transition states identified for the carbonate and alkoxide back-biting reactions. <sup>a</sup> .....                                                                                                                                                                                                                                                                                                                                                                                                                                         | 9 |

|                                                                                                                                                                                                                                                                                                                       |    |
|-----------------------------------------------------------------------------------------------------------------------------------------------------------------------------------------------------------------------------------------------------------------------------------------------------------------------|----|
| <b>Figure S2.</b> Comparison of NCI plots of $I_{Co}$ and $I_K$ , as well as Wiberg Bonding Indices of key metal–oxygen bonds from NBO analysis .....                                                                                                                                                                 | 10 |
| <b>Figure S3.</b> Comparison of NCI plots of $TS1_{Co}$ and $TS1_K$ , as well as Wiberg Bonding Indices of key metal–oxygen bonds from NBO analysis .....                                                                                                                                                             | 10 |
| <b>Figure S4.</b> Comparison of NCI plots of $II_{Co}$ and $II_K$ , as well as Wiberg Bonding Indices of key metal–oxygen bonds from NBO analysis .....                                                                                                                                                               | 11 |
| <b>Figure S5.</b> Comparison of selected bond critical points (bcp) calculated for $I_{Co}$ and $I_K$ from QTAIM. $\rho(r)$ and $\nabla^2\rho(r)$ in parentheses given in a.u. Data in include bcp for each primary metal–oxygen interaction as well as any between the (R)-PO and methylcarbonate fragments.....     | 11 |
| <b>Figure S6.</b> Comparison of selected bond critical points (bcp) calculated for $TS1_{Co}$ and $TS1_K$ from QTAIM. $\rho(r)$ and $\nabla^2\rho(r)$ in parentheses given in a.u. Data in include bcp for each primary metal–oxygen interaction as well as any between the (R)-PO and methylcarbonate fragments..... | 12 |
| <b>Figure S7.</b> Comparison of selected bond critical points (bcp) calculated for $II_{Co}$ and $II_K$ from QTAIM. $\rho(r)$ and $\nabla^2\rho(r)$ in parentheses given in a.u. Data in include bcp for each primary metal–oxygen interaction as well as any between the (R)-PO and methylcarbonate fragments.....   | 12 |
| <b>Table S8.</b> NPA charges, Wiberg Bond Indices and selected QTAIM data ( $\rho(r)$ and $\nabla^2\rho(r)$ in parentheses from QTAIM given in a. u.) for $I_{Co}$ , $TS1_{Co}$ , $II_{Co}$ , $I_K$ , $TS1_K$ and $II_K$ .....                                                                                        | 13 |
| Coordinates.....                                                                                                                                                                                                                                                                                                      | 14 |
| References .....                                                                                                                                                                                                                                                                                                      | 53 |

## Experimental

### General Experimental

All experimental manipulations were performed using a dual-manifold nitrogen-vacuum Schlenk line or in a nitrogen filled glovebox. All solvents and reagents were obtained from commercial sources and used as received, unless stated otherwise. Propylene Oxide was dried over  $\text{CaH}_2$  overnight and fractionally distilled prior to use. CP grade carbon dioxide (BOC, 99.995 %) was dried by passing it through two drying columns (VICI Metronics carbon dioxide purifier) in series, at 50 bar pressure, before use at lower pressures in the copolymerization. Catalyst **1** was synthesised according to literature procedure.<sup>[1]</sup>

Polymerization and depolymerization reactions were followed using a 100 mL Parr reactor fitted with a DiComp sentinel probe for in-situ-IR spectroscopic measurements.

**General polymerization procedure:** A solution of catalyst (13 mg, 0.02 mmol), *trans*-1,2-cyclohexene diol (46 mg, 0.4 mmol) and mesitylene (30  $\mu\text{L}$ , 0.2 mmol) in PO (6 mL, 85.7 mmol) was injected into a 100 mL Parr Reactor, under a stream of dry carbon dioxide. The reactor was pressurized to the target reaction pressure and allowed to reach the required temperature. Upon reaction completion, the reactor vessel was cooled to room temperature, depressurized, and the reaction quenched via the addition of a 1 M solution of benzoic acid in  $\text{CHCl}_3$ .

**General depolymerization procedure:** A 100 mL Parr reactor vessel was charged with catalyst **1** (11.3 mg, 0.018 mmol) as a solid, followed by a solution of PPC (0.184 g, 1.8 mmol) in PO (6 mL, 85.7 mmol) and heated to the target temperature. Upon completion, the reactor vessel was cooled to room temperature and a sample of the crude reaction mixture was removed for NMR analysis.

**Table S1:** Depolymerization of PPC using Catalyst **1** under standard conditions.<sup>a</sup>

| Entry | T (°C) | $k_{\text{obs}}$ ( $\text{s}^{-1}$ ) | $k_{\text{p}}$ ( $\text{dm}^3 \text{mol}^{-1} \text{s}^{-1}$ ) | $\ln(k_{\text{p}}/T)$ | Average $\ln(k_{\text{p}}/T)$ | Standard Deviation |
|-------|--------|--------------------------------------|----------------------------------------------------------------|-----------------------|-------------------------------|--------------------|
| 1     | 45     | 0.93                                 | 0.31                                                           | -6.94                 | -6.95                         | 0.127              |
| 2     | 45     | 0.77                                 | 0.26                                                           | -7.13                 |                               |                    |
| 3     | 45     | 1.02                                 | 0.34                                                           | -6.84                 |                               |                    |
| 4     | 45     | 0.98                                 | 0.33                                                           | -6.88                 |                               |                    |
| 5     | 50     | 1.36                                 | 0.45                                                           | -6.57                 | -6.64                         | 0.058              |
| 6     | 50     | 1.19                                 | 0.40                                                           | -6.71                 |                               |                    |
| 7     | 50     | 1.27                                 | 0.42                                                           | -6.64                 |                               |                    |
| 8     | 50     | 1.24                                 | 0.41                                                           | -6.66                 |                               |                    |
| 9     | 55     | 3.40                                 | 1.13                                                           | -5.67                 | -5.79                         | 0.093              |
| 10    | 55     | 2.71                                 | 0.90                                                           | -5.89                 |                               |                    |
| 11    | 55     | 3.04                                 | 1.01                                                           | -5.78                 |                               |                    |
| 12    | 55     | 2.98                                 | 0.99                                                           | -5.80                 |                               |                    |
| 13    | 60     | 4.52                                 | 1.51                                                           | -5.40                 | -5.62                         | 0.148              |
| 14    | 60     | 3.33                                 | 1.11                                                           | -5.70                 |                               |                    |
| 15    | 60     | 3.43                                 | 1.14                                                           | -5.68                 |                               |                    |
| 16    | 60     | 3.34                                 | 1.11                                                           | -5.70                 |                               |                    |

a) Reaction Conditions: [cat] : [PPC] = 1 : 100 where [PPC] = 0.3 M in toluene. All reactions were run to completion as determined by in-situ IR monitoring. All reactions resulted in the depolymerization of PPC to PC where no polyether linkages were detected by <sup>1</sup>H NMR spectroscopy.

## Density Functional Theory Calculations

### Computational Methods

DFT calculations were run using Gaussian 16 (Revision C.01).<sup>[2]</sup> The reaction free energies were calculated using the hybrid exchange-correlation  $\omega$ B97X-D functional, which includes D2 dispersion corrections described by Grimme.<sup>[3,4]</sup> A functional screening was undertaken on key transition states for both pathways, with the surveyed functionals including B3LYP<sup>[5,6]</sup> with Grimme's D3 dispersion correction including Becke-Johnson damping (GD3BJ),<sup>[7,8]</sup> M06<sup>[9]</sup> with Grimme's D3 dispersion correction (GD3)<sup>[10]</sup> and PBE0<sup>[11,12]</sup> with GD3BJ.<sup>[7,8]</sup> NBO analysis was performed using NBO 6.0.<sup>[13]</sup> QTAIM analysis was conducted using the AIMAll package.<sup>[14]</sup> Data are presented from *very fine* mesh calculations. Standard cut-offs for plotting the data with AIMAll were used. Non-covalent interactions were analysed using the NCIPLOT 3.0 program.<sup>[15]</sup>

The split valence 6-31+g(d,p) basis sets were used for carbon and hydrogen. This lower basis set was chosen as these elements do not bind directly to either catalytic metal center, but extra diffuse functions were added to capture more mid- and long-range interactions, for instance with growing polymer chains. The triple- $\zeta$  6-311+g(d) basis set was used for potassium and all heteroatoms. Cobalt centers were described with the Stuttgart SDD ECP and associated basis sets.

Geometry optimisation calculations were performed without symmetry constraints and using an "ultrafine" grid for numerical integration. All structures are optimized using the self-consistent reaction field (SCRF) approach with conductor-like polarisable continuum model (CPCM).<sup>[16]</sup> In polymerization reactions, the propylene oxide (PO) monomer also serves as the solvent but is not implemented as a standard solvent in Gaussian16. A CPCM model for PO was therefore implemented by using the built-in non-polar parameters of tetrahydrofuran, modified with the polar parameters of propylene oxide ( $\epsilon=16$ ,  $n^2=1.867$ ) ([SCRF=(cpcm,solvent=tetrahydrofuran),read] and [eps=16/epsinf=1.867]).

Free enthalpies were corrected using Goodvibes software,<sup>[17]</sup> with Grimme's quasiharmonic approximation applied with a frequency cut-off value of 100.0 wavenumbers, a frequency scale factor = 1.0. To account for experimental conditions, a temperature of 323.15 K and concentrations of 14.1156 mol L<sup>-1</sup> (for neat PO), 4.787 mol L<sup>-1</sup> (for CO<sub>2</sub> dissolved in PO at 50 bar and 313.15 K)<sup>[18]</sup> and 0.003 mol L<sup>-1</sup> (for any metal complex species) were also applied.

All intermediates and transition states were characterised by normal coordinate analysis revealing either precisely zero or one imaginary frequency, respectively. In the case of transition states, the imaginary frequency corresponds to the mode of the intended reaction step. Full coordinates for all the calculated stationary points are included as part of the supplementary information (.xyz).

Full coordinates for all structures, together with computed energies and vibrational frequency data, are available via the corresponding Gaussian 16 output files and calculation spreadsheet, stored in the open-access digital repository, DOI: [10.6084/m9.figshare.20026409](https://doi.org/10.6084/m9.figshare.20026409).

## Optimisation of catalyst 1 structure

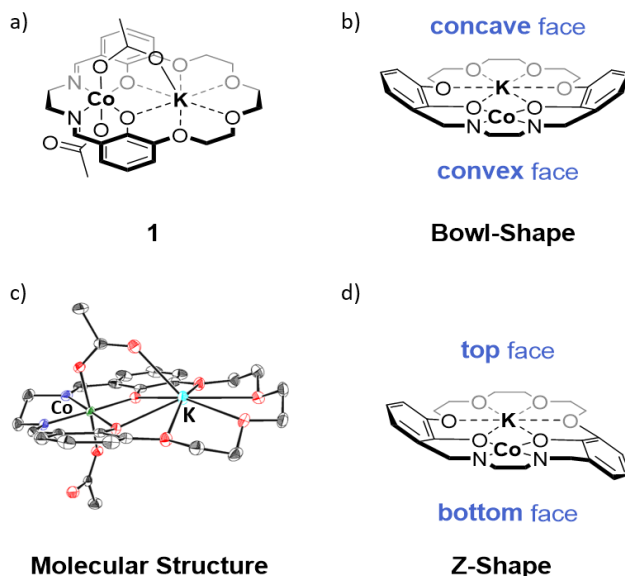

**Figure S1:** a) Illustration of the Co(III)K(I) heterodinuclear catalyst **1**. b) illustration of the 'bowl'-shape conformation of the ligand resulting in 'concave' and 'convex' faces. c) ORTEP representation of the molecular structure of catalyst **1** obtained through single crystal X-ray diffraction. d) Illustration of the 'Z'-shape conformation of the ligand resulting in complexes with 'top' ( $\kappa_2$ -acetate) and 'bottom' ( $\kappa_1$ -acetate) faces.

The molecular structure of Co(III)K(I), **1**, elucidated via single crystal X-ray diffraction, reveals the cobalt center is coordinated by the ligand's Schiff base binding cavity and the potassium is coordinated by the crown ether binding cavity. In the solid-state structure, the ligand adopts a Z-shape conformation and, because the acetate groups are both bridging and terminally coordinated, the catalyst has two different faces, labelled as 'top' and 'bottom' (Figure 2). The top face features the  $\kappa^2$ -acetate bridging between the cobalt and potassium, whereas the bottom face features the  $\kappa^1$ -acetate coordinated to cobalt. Previous investigations of similar macrocyclic complexes have revealed that the ligand can adopt either a 'Z'-shape or 'bowl'-shape and that often the latter is lower in energy.

When the ligand adopts the 'bowl'-shape, the complex has two different faces, labelled as 'concave' (ligand tilted towards the bridging acetate group) and 'convex' (ligand tilted away from the bridging acetate group). To understand which conformation would be most appropriate to use in subsequent DFT investigations, both 'Z'- and 'bowl'-shape conformations were subjected to geometry optimizations (Figure 2, Table S2). Both ground state geometries are energetically similar but the Z-shape is slightly lower in Gibbs free energy compared with the bowl shape (+4.8 kcal mol<sup>-1</sup>).

DFT calculations of the initiation process were conducted with propylene oxide coordination at the cobalt center, as opposed to potassium, as this coordination geometry results in significantly lower propagation barriers (*vide infra*). The calculations were conducted using both the 'Z'- and 'bowl'-shape ligand conformations since their energy differences in the ground state were small (Table S3). For the 'Z'-shape ligand conformation, propylene oxide ring-opening barriers were +21.1 and +25.1 kcal mol<sup>-1</sup> for the 'bottom' and 'top' faces, respectively. Whereas, the 'bowl' shape conformation, propylene oxide ring-opening on the catalyst's 'convex' face resulted in a transition state barrier of +25.9 kcal mol<sup>-1</sup> (relative to 'Z'-shape ground state). The equivalent attack from the catalyst's 'concave' face could not be optimized due to the increased steric crowding and is much higher in energy.

**Table S2:** Computed Free Gibbs Energies of the bowl and Z-shape conformations of **1** (without and with temperature and concentration corrections).<sup>a</sup>

| Structure          | $G$ (Hartree) | $\Delta\Delta G$ (kcal mol <sup>-1</sup> ) | $G$ (Hartree) <sup>b</sup> | $\Delta\Delta G$ (kcal mol <sup>-1</sup> ) <sup>b</sup> |
|--------------------|---------------|--------------------------------------------|----------------------------|---------------------------------------------------------|
| <b>1_Z</b>         | -2615.850307  | 0.0                                        | -2615.852097               | 0.0                                                     |
| <b>1_bowl</b>      | -2615.842032  | 5.2                                        | -2615.84444                | 4.8                                                     |
| <b>1_prop_Z</b>    | -2691.070732  | 0.0                                        | -2691.073021               | 0.0                                                     |
| <b>1_prop_bowl</b> | -2691.062276  | 5.3                                        | -2691.06501                | 5.0                                                     |

Calculations performed using rwb97xD functional, 6-31+g(d,p)/ 6-311+g(d)/SDD basis set and ECP, and modified cpcm solvation model (solvent=THF,  $\epsilon=16$ ,  $n^2=1.867$ ). Default temperature = 298.15 K, concentration = 1.0 mol L<sup>-1</sup>. **1\_prop** structures feature one methylcarbonate co-ligand in place of one acetate to model a propagating chain. <sup>b</sup>Goodvibes correction applied at 323.15 K and concentration = 0.003 mol L<sup>-1</sup>.

## Modelling of the initiation step of the copolymerisation

**Table S3:** Computed Free Gibbs Energies of the transition states for the first ring-opening of propylene oxide by **1** (**TS1<sub>Co</sub>**; propylene oxide coordination at the cobalt center; without and with temperature and concentration corrections).<sup>a</sup>

| Structure                                       | G (Hartree)  | $\Delta\Delta G$ (kcal mol <sup>-1</sup> ) | G (Hartree) <sup>b</sup> | $\Delta\Delta G$ (kcal mol <sup>-1</sup> ) <sup>b</sup> |
|-------------------------------------------------|--------------|--------------------------------------------|--------------------------|---------------------------------------------------------|
| R-PO                                            | -193.025528  |                                            | -193.02215               |                                                         |
| S-PO                                            | -193.025516  |                                            | -193.022138              |                                                         |
| <b>1_Z</b>                                      | -2615.850307 |                                            | -2615.852097             |                                                         |
| Reference for R-PO opening ( <b>1_Z</b> + R-PO) | -2808.875835 | 0.0                                        | -2808.882901             | 0.0                                                     |
| Reference for S-PO opening ( <b>1_Z</b> + S-PO) | -2808.875823 | 0.0                                        | -2808.882889             |                                                         |
|                                                 |              |                                            |                          |                                                         |
| Co_bowl_R                                       | -2808.831301 | 27.9                                       | -2808.833052             | 25.9                                                    |
| Co_bowl_S                                       | -2808.827754 | 30.2                                       | -2808.830941             | 27.2                                                    |
| Co_Z_bottom_R                                   | -2808.837199 | 24.2                                       | -2808.840665             | 21.1                                                    |
| Co_Z_bottom_S                                   | -2808.834532 | 25.9                                       | -2808.838474             | 22.4                                                    |
| Co_Z_top_R                                      | -2808.832643 | 27.1                                       | -2808.834192             | 25.1                                                    |
| Co_Z_top_S                                      | -2808.832655 | 27.1                                       | -2808.834171             | 25.1                                                    |

Calculations performed using rwb97xD functional, 6-31+g(d,p)/ 6-311+g(d)/SDD basis set and ECP, and modified cpcm solvation model (solvent=THF,  $\epsilon=16$ ,  $n^2=1.867$ ). Default temperature = 298.15 K, concentration = 1.0 mol L<sup>-1</sup>. <sup>b</sup>Goodvibes correction applied at 323.15 K and concentration = 0.003 mol L<sup>-1</sup> (14.1156 mol L<sup>-1</sup> for [PO]).

## Modelling of the propagation step of the copolymerisation

### Cobalt activated-epoxide pathway

**Table S4:** Computed Free Gibbs Energies of intermediates and transition states identified for the propagation step of the alternating copolymerization of R-propylene oxide (PO) and carbon dioxide using catalyst **1**, where PO coordination occurs at Co(III) (without and with temperature and concentration corrections). The starting point of the calculations is structure **1<sub>prop\_Z</sub>**, in which the ligand adopts a Z-shape conformation and one acetate ligand of **1** is replaced by one methyl carbonate ligand, modelling a growing polymer chain.<sup>a</sup>

| Structure                                           | G (Hartree)  | $\Delta\Delta G$ (kcal mol <sup>-1</sup> ) | G (Hartree) <sup>b</sup> | $\Delta\Delta G$ (kcal mol <sup>-1</sup> ) <sup>b</sup> |
|-----------------------------------------------------|--------------|--------------------------------------------|--------------------------|---------------------------------------------------------|
| R-PO                                                | -193.025528  |                                            | -193.02215               |                                                         |
| CO <sub>2</sub>                                     | -188.583009  |                                            | -188.580102              |                                                         |
| <b>0.0 (1<sub>prop_Z</sub>)</b>                     | 2691.070732  |                                            | -2691.073021             |                                                         |
| Reference ( <b>0.0</b> + R-PO)                      | -2884.09626  | 0.0                                        | -2884.095171             | 0.0                                                     |
| Reference ( <b>0.0</b> + R-PO + CO <sub>2</sub> )   | -3072.679269 | 0.0                                        | -3072.675273             | 0.0                                                     |
| Reference ( <b>0.0</b> + 2 R-PO + CO <sub>2</sub> ) | -3261.262278 | 0.0                                        | -3265.697423             | 0.0                                                     |
|                                                     |              |                                            |                          |                                                         |
| I <sub>Co</sub>                                     | -2884.082375 | 8.7                                        | -2884.086202             | 5.6                                                     |
| TS1 <sub>Co</sub>                                   | -2884.057402 | 24.4                                       | -2884.06133              | 21.2                                                    |
| TS1 <sub>Co</sub> <sup>1</sup>                      | -2884.056148 | 25.2                                       | -2884.059263             | 22.5                                                    |
| II <sub>Co</sub>                                    | -2884.096972 | -0.4                                       | -2884.099825             | -2.9                                                    |
| III <sub>Co</sub>                                   | -2884.08681  | 5.9                                        | -2884.088175             | 4.4                                                     |
| IV <sub>Co</sub>                                    | -3072.665935 | 8.4                                        | -3072.667256             | 5.0                                                     |
| TS2 <sub>Co</sub>                                   | -3072.652366 | 16.9                                       | -3072.654037             | 13.3                                                    |
| V <sub>Co</sub>                                     | -3072.652354 | 16.9                                       | -3072.654227             | 13.2                                                    |
| VI <sub>Co</sub>                                    | -3072.683798 | -2.8                                       | -3072.68588              | -6.7                                                    |
| VII <sub>Co</sub>                                   | -3265.701869 | 1.8                                        | -3265.70388              | -4.1                                                    |
| TS3 <sub>Co</sub>                                   | -3265.670705 | 21.4                                       | -3265.67261              | 15.6                                                    |

Calculations performed using rwb97xD functional, 6-31+g(d,p)/ 6-311+g(d)/SDD basis set and ECP, and modified cpcm solvation model (solvent=THF,  $\epsilon=16$ ,  $n^2=1.867$ ). Default temperature = 298.15 K, concentration = 1.0 mol L<sup>-1</sup>. <sup>b</sup>Goodvibes correction applied at 323.15 K and concentration = 0.003 mol L<sup>-1</sup> (14.1156 mol L<sup>-1</sup> for [PO]; 4.787 mol L<sup>-1</sup> for [CO<sub>2</sub>]).

### Potassium activated-epoxide pathway

**Table S5:** Computed Free Gibbs Energies of intermediates and transition states identified for the propagation step of the alternating copolymerization of R-propylene oxide (PO) and carbon dioxide using catalyst **1**, where PO coordination occurs at K(I) (without and with temperature and concentration corrections). The starting point of the calculations is structure **1\_prop\_Z**, in which the ligand adopts a Z-shape conformation and one acetate ligand of **1** is replaced by one methyl carbonate ligand, modelling a growing polymer chain.<sup>a</sup>

| Structure                                     | G (Hartree)  | $\Delta\Delta G$ (kcal mol <sup>-1</sup> ) | G (Hartree) <sup>b</sup> | $\Delta\Delta G$ (kcal mol <sup>-1</sup> ) <sup>b</sup> |
|-----------------------------------------------|--------------|--------------------------------------------|--------------------------|---------------------------------------------------------|
| <b>R-PO</b>                                   | -193.025528  |                                            | -193.02215               |                                                         |
| <b>CO<sub>2</sub></b>                         | -188.583009  |                                            | -188.580102              |                                                         |
| <b>0.0 (1_prop_Z)</b>                         | -2691.070732 |                                            | -2691.073021             |                                                         |
| <b>Reference (0.0 +R-PO)</b>                  | -2884.09626  | 0.0                                        | -2884.095171             | 0.0                                                     |
| <b>Reference (0.0 +R-PO+CO<sub>2</sub>)</b>   | -3072.679269 | 0.0                                        | -3072.675273             | 0.0                                                     |
| <b>Reference (0.0 +2 R-PO+CO<sub>2</sub>)</b> | -3261.262278 | 0.0                                        | -3265.697423             | 0.0                                                     |
|                                               |              |                                            |                          |                                                         |
| <b>I<sub>K</sub></b>                          | -2884.091051 | 3.3                                        | -2884.094399             | 0.5                                                     |
| <b>TS1<sub>K</sub></b>                        | -2884.036085 | 37.8                                       | -2884.040086             | 34.6                                                    |
| <b>II<sub>K</sub></b>                         | -2884.056033 | 25.2                                       | -2884.060074             | 22.0                                                    |
| <b>III<sub>K</sub></b>                        | -2884.042542 | 33.7                                       | -2884.043595             | 32.4                                                    |
| <b>IV<sub>K</sub></b>                         | -3072.618289 | 38.3                                       | -3072.618592             | 35.6                                                    |
| <b>TS2<sub>K</sub></b>                        | -3072.616858 | 39.2                                       | -3072.617581             | 36.2                                                    |
| <b>V<sub>K</sub></b>                          | -3072.645914 | 20.9                                       | -3072.646795             | 17.9                                                    |
| <b>VI<sub>K</sub> (VI<sub>Co</sub>)</b>       | -3072.683798 | -2.8                                       | -3072.68588              | -6.7                                                    |
| <b>VII<sub>K</sub></b>                        | -3265.702792 | 1.3                                        | -3265.703589             | -3.9                                                    |

Calculations performed using rwb97xD functional, 6-31+g(d,p)/ 6-311+g(d)/SDD basis set and ECP, and modified cpcm solvation model (solvent=THF,  $\epsilon=16$ ,  $n^2=1.867$ ). Default temperature = 298.15 K, concentration = 1.0 mol L<sup>-1</sup>. <sup>b</sup>Goodvibes correction applied at 323.15 K and concentration = 0.003 mol L<sup>-1</sup> (14.1156 mol L<sup>-1</sup> for [PO]; 4.787 mol L<sup>-1</sup> for [CO<sub>2</sub>]).

### Influence of DFT method (functional) on TS1<sub>Co</sub> and TS1<sub>K</sub> Free Gibbs Energies

**Table S6:** Computed Free Gibbs Energies of TS1<sub>Co</sub> and TS1<sub>K</sub> transition states using various DFT functionals. (without and with temperature and concentration corrections).<sup>a</sup>

| Functional        | Structure               | G (Hartree)  | $\Delta\Delta G$ (kcal mol <sup>-1</sup> ) | G (Hartree) <sup>b</sup> | $\Delta\Delta G$ (kcal mol <sup>-1</sup> ) <sup>b</sup> |
|-------------------|-------------------------|--------------|--------------------------------------------|--------------------------|---------------------------------------------------------|
| <b>rwb97xD</b>    | <b>R-PO</b>             | -193.025528  |                                            | -193.02215               |                                                         |
|                   | <b>1_prop_Z (0.0)</b>   | -2691.070732 |                                            | -2691.073021             |                                                         |
|                   | <b>Reference</b>        | -2884.09626  | 0.0                                        | -2884.095171             | 0.0                                                     |
|                   | <b>TS1<sub>Co</sub></b> | -2884.057402 | 24.4                                       | -2884.06133              | 21.2                                                    |
|                   | <b>TS1<sub>K</sub></b>  | -2884.036085 | 37.8                                       | -2884.040086             | 34.6                                                    |
| <b>B3LYP-D3BJ</b> | <b>R-PO</b>             | -193.100182  |                                            | -193.096811              |                                                         |
|                   | <b>1_prop_Z (0.0)</b>   | -2691.893649 |                                            | -2691.896552             |                                                         |
|                   | <b>Reference</b>        | -2884.993831 | 0.0                                        | -2884.993363             | 0.0                                                     |
|                   | <b>TS1<sub>Co</sub></b> | -2884.965592 | 17.7                                       | -2884.968984             | 15.3                                                    |
|                   | <b>TS1<sub>K</sub></b>  | -2884.943403 | 31.6                                       | -2884.94682              | 29.2                                                    |
| <b>M06-D3</b>     | <b>R-PO</b>             | -192.955836  |                                            | -192.952461              |                                                         |
|                   | <b>1_prop_Z (0.0)</b>   | -2690.474913 |                                            | -2690.478616             |                                                         |
|                   | <b>Reference</b>        | -2883.430749 | 0.0                                        | -2883.431077             | 0.0                                                     |
|                   | <b>TS1<sub>Co</sub></b> | -2883.40183  | 18.1                                       | -2883.406006             | 15.7                                                    |
|                   | <b>TS1<sub>K</sub></b>  | -2883.378609 | 32.7                                       | -2883.383501             | 29.9                                                    |
| <b>MN15</b>       | <b>R-PO</b>             | -192.851937  |                                            | -192.848563              |                                                         |
|                   | <b>1_prop_Z (0.0)</b>   | -2689.474129 |                                            | -2689.477857             |                                                         |
|                   | <b>Reference</b>        | -2882.326066 | 0.0                                        | -2882.32642              | 0.0                                                     |
|                   | <b>TS1<sub>Co</sub></b> | -2882.290791 | 22.1                                       | -2882.295209             | 19.6                                                    |
|                   | <b>TS1<sub>K</sub></b>  | -2882.268018 | 36.4                                       | -2882.272834             | 33.6                                                    |
| <b>PBE0-D3BJ</b>  | <b>R-PO</b>             | -192.867421  |                                            | -192.864043              |                                                         |
|                   | <b>1_prop_Z (0.0)</b>   | -2689.364354 |                                            | -2689.367298             |                                                         |
|                   | <b>Reference</b>        | -2882.231775 | 0.0                                        | -2882.231341             | 0.0                                                     |
|                   | <b>TS1<sub>Co</sub></b> | -2882.196923 | 21.9                                       | -2882.200613             | 19.3                                                    |
|                   | <b>TS1<sub>K</sub></b>  | -2882.173904 | 36.3                                       | -2882.177451             | 33.8                                                    |

Calculations performed using named functional, 6-31+g(d,p)/ 6-311+g(d)/SDD basis set and ECP, and modified cpcm solvation model (solvent=THF,  $\epsilon=16$ ,  $n^2=1.867$ ). Default temperature = 298.15 K, concentration = 1.0 mol L<sup>-1</sup>. <sup>b</sup>Goodvibes correction applied at 323.15 K and concentration = 0.003 mol L<sup>-1</sup> (14.1156 mol L<sup>-1</sup> for [PO]).



## Back-biting reaction pathways

**Table S7:** Computed Free Gibbs Energies of intermediates and transition states identified for the carbonate and alkoxide back-biting reactions.<sup>a</sup>

| Structure                                  | G (Hartree)  | $\Delta\Delta G$ (kcal mol <sup>-1</sup> ) | G (Hartree) <sup>b</sup> | $\Delta\Delta G$ (kcal mol <sup>-1</sup> ) <sup>b</sup> |
|--------------------------------------------|--------------|--------------------------------------------|--------------------------|---------------------------------------------------------|
| R-PO                                       | -193.025528  |                                            | -193.02215               |                                                         |
| CO <sub>2</sub>                            | -188.583009  |                                            | -188.580102              |                                                         |
| 0.0 (1_prop_Z)                             | -2615.850307 |                                            | -2691.073021             |                                                         |
| R-propylene carbonate                      | -381.62166   | -8.2                                       |                          |                                                         |
| <b>Carbonate back-biting pathway</b>       |              |                                            |                          |                                                         |
| Reference (0.0 + R-PO + CO <sub>2</sub> )  | -3072.679269 | 0.0                                        | -3072.675273             | 0.0                                                     |
| VI <sub>Co</sub>                           | -3072.683798 | -2.8                                       | -3072.68588              | -6.7                                                    |
| TS <sub>3Co</sub>                          | -3072.631852 | 29.8                                       | -3072.63502              | 25.3                                                    |
| IX <sub>Co</sub>                           | -3072.673336 | 3.7                                        | -3072.67687              | -1.0                                                    |
| 0.0 + R-propylene carbonate                | -3072.692392 | -8.2                                       | -3072.70025              | -15.7                                                   |
| <b>Alkoxide back-biting pathway</b>        |              |                                            |                          |                                                         |
| Reference (0.0 + R-PO)                     | -2884.09626  | 0.0                                        | -2884.095171             | 0.0                                                     |
| II <sub>Co</sub>                           | -2884.096972 | -0.4                                       | -2884.099825             | -2.9                                                    |
| TS <sub>4Co</sub>                          | -2884.060373 | 22.5                                       | -2884.063982             | 19.6                                                    |
| X <sub>Co</sub>                            | -2884.096295 | 0.0                                        | -2884.098289             | -2.0                                                    |
| VIII <sub>Co</sub>                         | -2502.479331 |                                            | -2502.483277             |                                                         |
| VIII <sub>Co</sub> + R-propylene carbonate | -2884.100991 | -3.0                                       | -2884.110506             | -9.6                                                    |

Calculations performed using named functional, 6-31+g(d,p)/ 6-311+g(d)/SDD basis set and ECP, and modified cpcm solvation model (solvent=THF,  $\epsilon=16$ ,  $n^2=1.867$ ). Default temperature = 298.15 K, concentration = 1.0 mol L<sup>-1</sup>. <sup>b</sup>Goodvibes correction applied at 323.15 K and concentration = 0.003 mol L<sup>-1</sup> (14.1156 mol L<sup>-1</sup> for [PO]).

IX<sub>Co</sub>

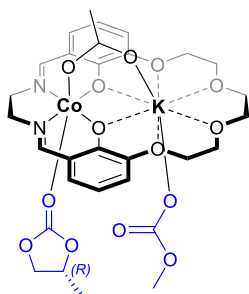

X<sub>Co</sub>

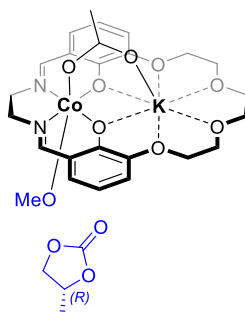

VIII<sub>Co</sub>

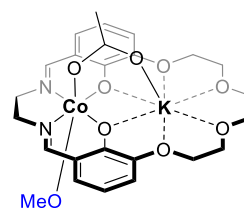

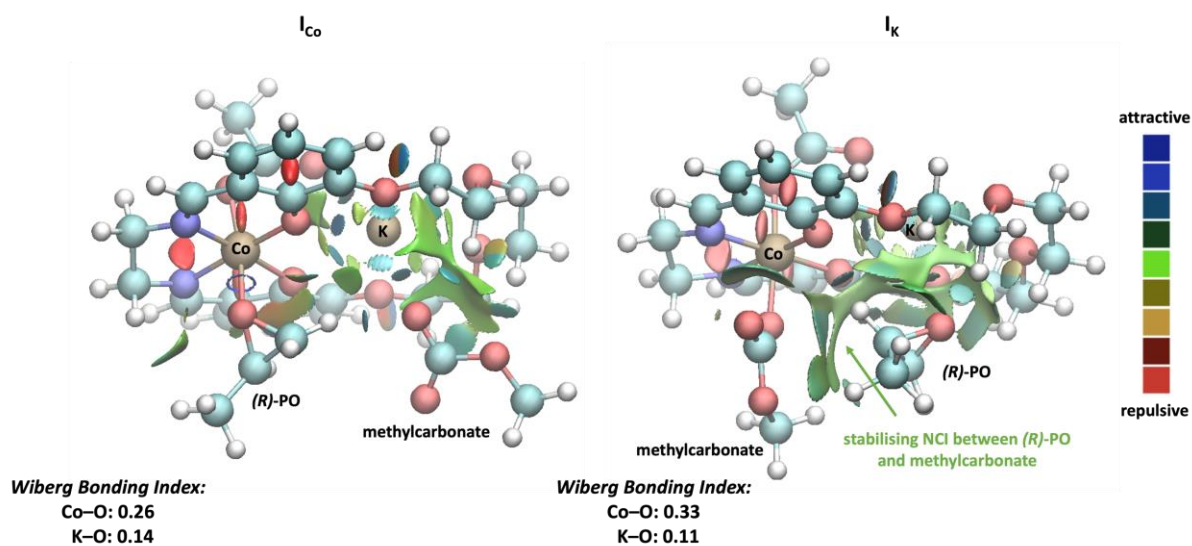

**Figure S2.** Comparison of NCI plots of  $I_{Co}$  and  $I_K$ , as well as Wiberg Bonding Indices of key metal–oxygen bonds from NBO analysis

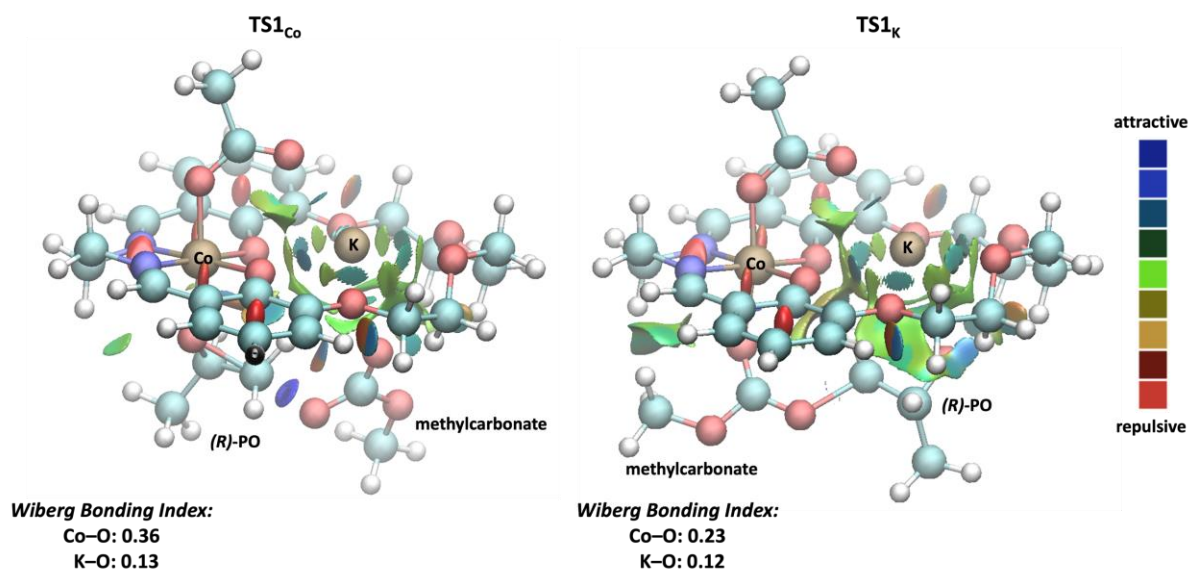

**Figure S3.** Comparison of NCI plots of  $TS1_{Co}$  and  $TS1_K$ , as well as Wiberg Bonding Indices of key metal–oxygen bonds from NBO analysis

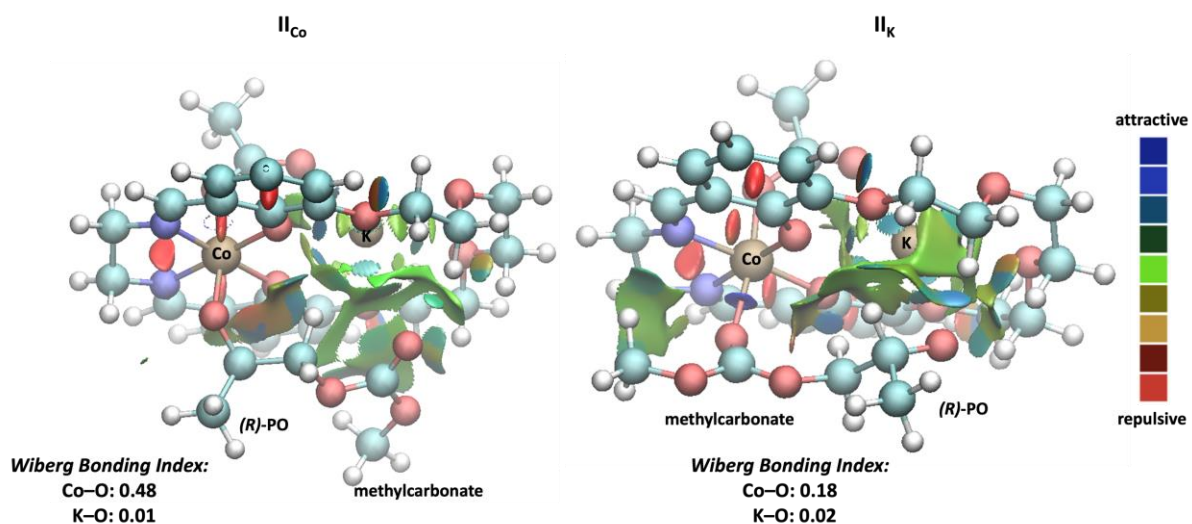

**Figure S4.** Comparison of NCI plots of  $I_{Co}$  and  $I_K$ , as well as Wiberg Bonding Indices of key metal–oxygen bonds from NBO analysis

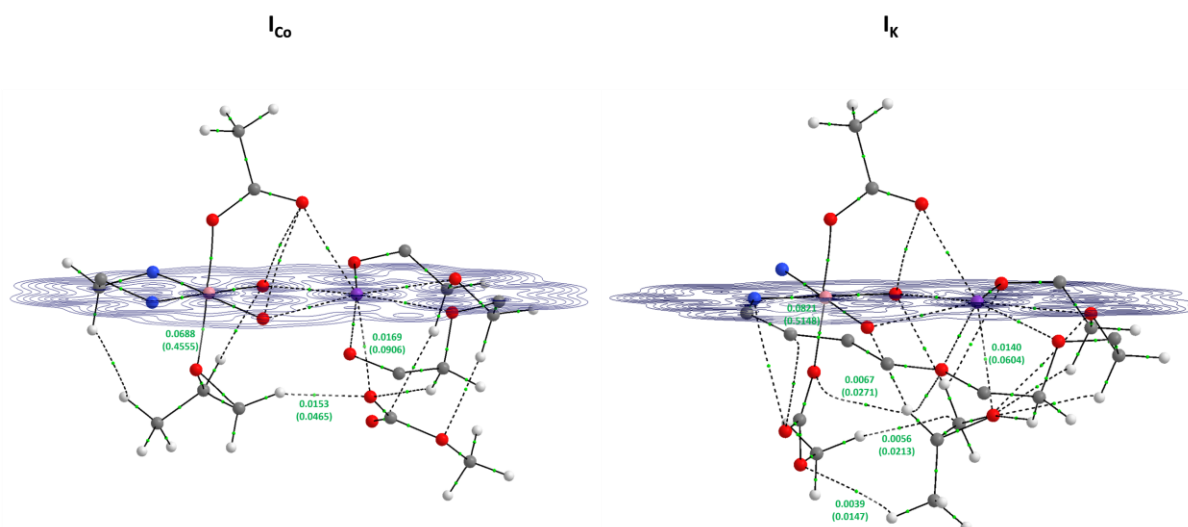

**Figure S5.** Comparison of selected bond critical points (bcp) calculated for  $I_{Co}$  and  $I_K$  from QTAIM.  $\rho(r)$  and  $\nabla^2\rho(r)$  in parentheses given in a.u. Data in include bcp for each primary metal–oxygen interaction as well as any between the (R)-PO and methylcarbonate fragments.

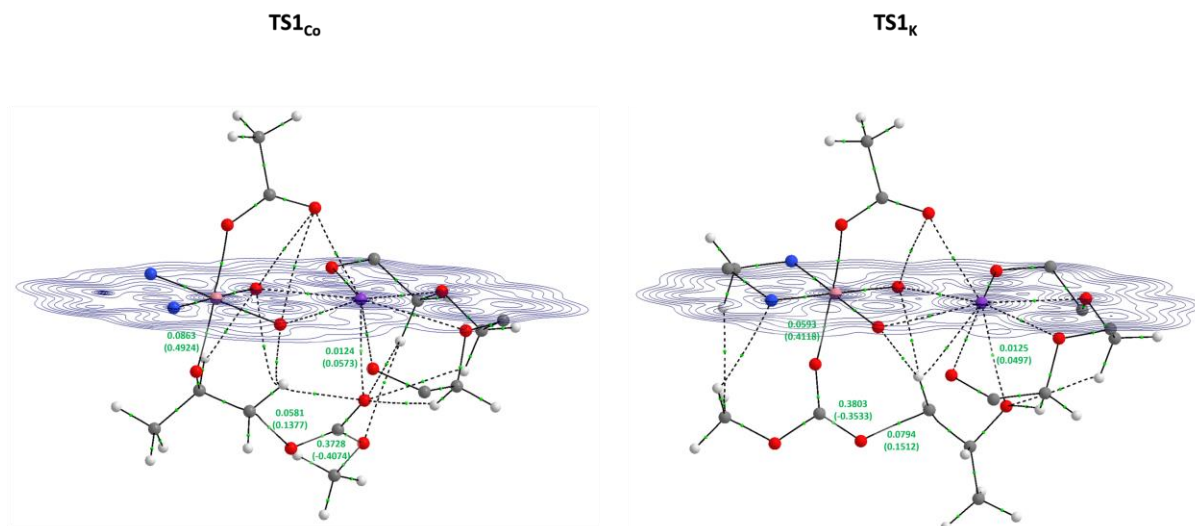

**Figure S6.** Comparison of selected bond critical points (bcp) calculated for  $TS1_{Co}$  and  $TS1_K$  from QTAIM.  $\rho(r)$  and  $\nabla^2\rho(r)$  in parentheses given in a.u. Data include bcp for each primary metal–oxygen interaction as well as any between the (R)-PO and methylcarbonate fragments.

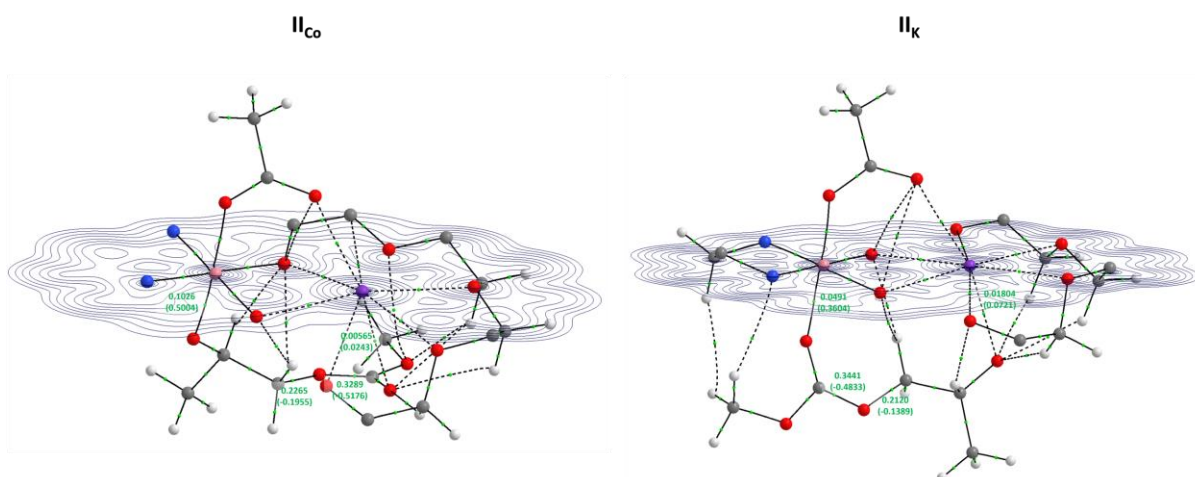

**Figure S7.** Comparison of selected bond critical points (bcp) calculated for  $II_{Co}$  and  $II_K$  from QTAIM.  $\rho(r)$  and  $\nabla^2\rho(r)$  in parentheses given in a.u. Data include bcp for each primary metal–oxygen interaction as well as any between the (R)-PO and methylcarbonate fragments.

**Table S8.** NPA charges, Wiberg Bond Indices and selected QTAIM data ( $\rho(r)$  and  $\nabla^2\rho(r)$  in parentheses from QTAIM given in a. u.) for  $I_{Co}$ ,  $TS1_{Co}$ ,  $II_{Co}$ ,  $I_K$ ,  $TS1_K$  and  $II_K$ .

|                                                                                                       | $I_{Co}$   | $TS1_{Co}$ | $II_{Co}$   | $I_K$                    | $TS1_K$    | $II_K$      |
|-------------------------------------------------------------------------------------------------------|------------|------------|-------------|--------------------------|------------|-------------|
| <i>NPA charges</i>                                                                                    |            |            |             |                          |            |             |
| Co                                                                                                    | 1.32       | 1.31       | 1.31        | 1.34                     | 1.35       | 1.35        |
| K                                                                                                     | 0.90       | 0.91       | 0.91        | 0.91                     | 0.91       | 0.90        |
| <i>WBIs</i>                                                                                           |            |            |             |                          |            |             |
| Co–O                                                                                                  | 0.26       | 0.36       | 0.48        | 0.33                     | 0.23       | 0.18        |
| K–O                                                                                                   | 0.14       | 0.13       | 0.01        | 0.11                     | 0.12       | 0.02        |
| PO–carbonate interaction(s)                                                                           | 0.02       | 0.01       | -           | 0.0004<br>0.001          | -          | -           |
| New PO–carbonate bond formed                                                                          | -          | 0.28       | 0.83        | -                        | 0.37       | 0.80        |
| <i><math>\rho(r)</math> and <math>\nabla^2\rho(r)</math> in parentheses from QTAIM given in a. u.</i> |            |            |             |                          |            |             |
| Co–O                                                                                                  | 0.07(0.46) | 0.09(0.49) | 0.10(0.50)  | 0.08(0.52)               | 0.06(0.41) | 0.05(0.36)  |
| K–O                                                                                                   | 0.02(0.09) | 0.01(0.06) | 0.01(0.02)  | 0.01(0.06)               | 0.01(0.05) | 0.02(0.07)  |
| PO–carbonate interaction(s)                                                                           | 0.02(0.05) | 0.02(0.06) | -           | 0.01(0.03)<br>0.01(0.02) | -          | -           |
| New PO–carbonate bond formed                                                                          | -          | 0.06(0.14) | 0.23(-0.20) | -                        | 0.08(0.15) | 0.21(-0.14) |

# Coordinates

## Ligand Conformational Screening

1\_bowl.log

SCF (wB97xd) = -2616.32148935  
E(SCF)+ZPE(0 K)= -2615.769255  
H(298 K)= -2615.729767  
G(298 K)= -2615.842032  
Lowest Frequency = 17.1257cm<sup>-1</sup>

|    |             |             |             |
|----|-------------|-------------|-------------|
| O  | 1.15602400  | -0.02358400 | 0.41601700  |
| C  | 2.41038900  | 0.08141700  | 0.13870000  |
| C  | 3.20166900  | -1.11969700 | 0.08567100  |
| C  | -3.50165500 | -0.94016300 | -0.52700300 |
| C  | -2.72476200 | 0.21498200  | -0.17162100 |
| O  | -1.57070000 | 0.04951100  | 0.39498200  |
| C  | -3.30716300 | 1.47832100  | -0.45998200 |
| C  | -2.63281800 | 2.70668300  | -0.11956100 |
| H  | -3.21884600 | 3.62720800  | -0.17820400 |
| N  | -1.41354100 | 2.79171200  | 0.24725200  |
| C  | -0.80379300 | 4.05017300  | 0.64449000  |
| H  | -0.71374300 | 4.05085000  | 1.73515100  |
| H  | -1.41248500 | 4.90591600  | 0.33816800  |
| C  | 0.57252700  | 4.08189800  | -0.00228600 |
| N  | 1.15067700  | 2.74160500  | 0.12546000  |
| C  | 2.40530900  | 2.56818500  | -0.06536100 |
| H  | 3.02148100  | 3.45603300  | -0.23240100 |
| C  | 3.08981900  | 1.30224800  | -0.11144400 |
| C  | 4.46787700  | 1.31449600  | -0.43859400 |
| H  | 4.95214200  | 2.26874500  | -0.62834500 |
| C  | 5.17997500  | 0.14382500  | -0.53303400 |
| C  | 4.53476000  | -1.08329600 | -0.26789100 |
| H  | 5.10828900  | -1.99970600 | -0.34664500 |
| C  | -4.73515200 | -0.81324000 | -1.13926200 |
| H  | -5.30063500 | -1.69408200 | -1.41987400 |
| C  | -5.28622600 | 0.45345700  | -1.41136900 |
| C  | -4.58063800 | 1.58085800  | -1.06307400 |
| H  | -4.99067000 | 2.56855200  | -1.25640500 |
| O  | -0.17386900 | -0.84855100 | -2.16213300 |
| C  | -0.25120400 | 0.35024300  | -2.44082300 |
| O  | -0.21792000 | 1.33920800  | -1.62022100 |
| C  | -0.43820900 | 0.78622700  | -3.88767900 |
| H  | -0.18553400 | -0.02687300 | -4.56988600 |
| H  | -1.48920500 | 1.05654400  | -4.03597400 |
| H  | 0.16590600  | 1.66829200  | -4.11168200 |
| H  | -6.25755700 | 0.52559800  | -1.88798100 |
| H  | 6.23005500  | 0.14902800  | -0.80343900 |
| Co | -0.17108700 | 1.36088000  | 0.30403800  |
| K  | -0.23532900 | -2.21193400 | 0.17122400  |
| H  | 0.47066500  | 4.30734300  | -1.06940000 |
| H  | 1.21655600  | 4.83596800  | 0.45857400  |
| O  | 2.51749400  | -2.25418600 | 0.41033800  |
| O  | -2.93053600 | -2.14429400 | -0.22358500 |
| C  | -3.52139100 | -3.31095500 | -0.77546300 |
| H  | -3.54359800 | -3.23128500 | -1.87006300 |
| H  | -4.54789400 | -3.43448800 | -0.40771100 |
| C  | -2.73578700 | -4.52953600 | -0.35313800 |
| H  | -3.26387500 | -5.41264600 | -0.73975400 |
| H  | -2.70564400 | -4.60156400 | 0.74403600  |
| C  | 3.16956300  | -3.50796300 | 0.30072100  |
| H  | 3.30876700  | -3.76158600 | -0.75853900 |

|   |             |             |             |
|---|-------------|-------------|-------------|
| H | 4.15446200  | -3.48430700 | 0.78341100  |
| C | 2.33991700  | -4.54316000 | 1.04167200  |
| H | 2.85380400  | -5.51258500 | 0.97005400  |
| H | 2.28288400  | -4.26089600 | 2.09617000  |
| O | 1.00169000  | -4.65558700 | 0.60815600  |
| O | -1.42092600 | -4.46967800 | -0.86828900 |
| C | 0.78804000  | -5.35864700 | -0.60246200 |
| H | 1.35373800  | -6.30087300 | -0.60460200 |
| H | 1.10821300  | -4.76199400 | -1.46852100 |
| C | -0.68889700 | -5.67225000 | -0.69693800 |
| H | -1.00017900 | -6.17723400 | 0.22714300  |
| H | -0.87424100 | -6.34817400 | -1.54253300 |
| O | 0.00208800  | 1.47942900  | 2.21333800  |
| C | -0.89604700 | 1.61244000  | 3.12745600  |
| O | -2.09374000 | 1.83938200  | 2.95787800  |
| C | -0.32565900 | 1.46067800  | 4.53319600  |
| H | -0.00011200 | 0.42613800  | 4.68093500  |
| H | 0.55150900  | 2.10112900  | 4.65838100  |
| H | -1.07728200 | 1.71071400  | 5.28331000  |

1\_prop\_bowl.log

SCF (wB97xd) = -2691.54706719  
E(SCF)+ZPE(0 K)= -2690.988975  
H(298 K)= -2690.948806  
G(298 K)= -2691.062276  
Lowest Frequency = 17.3086cm<sup>-1</sup>

|   |             |             |             |
|---|-------------|-------------|-------------|
| O | 1.15602600  | -0.01369500 | 0.37085400  |
| C | 2.41636400  | 0.09221100  | 0.12150300  |
| C | 3.20833700  | -1.10880300 | 0.09245700  |
| C | -3.50251200 | -0.92509400 | -0.51927500 |
| C | -2.72809100 | 0.23117100  | -0.16653900 |
| O | -1.57267000 | 0.07143300  | 0.40347500  |
| C | -3.31089000 | 1.49317600  | -0.45640800 |
| C | -2.63284300 | 2.72100600  | -0.12047900 |
| H | -3.21815400 | 3.64226500  | -0.17194800 |
| N | -1.40894300 | 2.80401600  | 0.23168300  |
| C | -0.78965500 | 4.06229400  | 0.61563100  |
| H | -0.68028700 | 4.06458900  | 1.70442200  |
| H | -1.40209400 | 4.91834800  | 0.31819400  |
| C | 0.57413700  | 4.08737500  | -0.05720600 |
| N | 1.15526900  | 2.74959700  | 0.07954400  |
| C | 2.41262900  | 2.57687600  | -0.09462400 |
| H | 3.02903200  | 3.46474600  | -0.25967000 |
| C | 3.09939000  | 1.31212400  | -0.12098400 |
| C | 4.48402500  | 1.32374400  | -0.41952900 |
| H | 4.97152700  | 2.27723800  | -0.60446500 |
| C | 5.19821300  | 0.15291400  | -0.49214100 |
| C | 4.54850600  | -1.07325800 | -0.23325700 |
| H | 5.12446800  | -1.98942000 | -0.29470200 |
| C | -4.73669200 | -0.79934900 | -1.13145000 |
| H | -5.30160000 | -1.68081400 | -1.41108500 |
| C | -5.28887200 | 0.46620100  | -1.40462200 |
| C | -4.58473300 | 1.59519600  | -1.05796500 |
| H | -4.99544100 | 2.58229900  | -1.25237900 |
| O | -0.21820600 | -0.85345900 | -2.15320200 |
| C | -0.28847100 | 0.34036000  | -2.44825900 |
| O | -0.24022300 | 1.34253300  | -1.64085200 |

|    |             |             |             |
|----|-------------|-------------|-------------|
| C  | -0.48516300 | 0.76172600  | -3.89745900 |
| H  | -0.24722100 | -0.06232800 | -4.57161800 |
| H  | -1.53473700 | 1.04096500  | -4.03857800 |
| H  | 0.12581500  | 1.63464100  | -4.13780900 |
| H  | -6.26042500 | 0.53666900  | -1.88099200 |
| H  | 6.25375100  | 0.15718500  | -0.74028200 |
| Co | -0.16602500 | 1.37166200  | 0.26919900  |
| K  | -0.24219700 | -2.19868400 | 0.20436100  |
| H  | 0.45226200  | 4.29711400  | -1.12541200 |
| H  | 1.22583600  | 4.84811400  | 0.38111200  |
| O  | 2.51754900  | -2.24080000 | 0.41090400  |
| O  | -2.93155000 | -2.12833000 | -0.21399400 |
| C  | -3.51871300 | -3.29543000 | -0.76971700 |
| H  | -3.53763500 | -3.21357000 | -1.86417200 |
| H  | -4.54598200 | -3.42139700 | -0.40512200 |
| C  | -2.73261000 | -4.51364700 | -0.34729900 |
| H  | -3.25855900 | -5.39653500 | -0.73727300 |
| H  | -2.70576300 | -4.58789400 | 0.74982200  |
| C  | 3.17160700  | -3.49555000 | 0.32415400  |
| H  | 3.32389400  | -3.76099400 | -0.73031600 |
| H  | 4.15032600  | -3.46591200 | 0.81873100  |
| C  | 2.33418700  | -4.52294400 | 1.06740700  |
| H  | 2.84675900  | -5.49386900 | 1.00719200  |
| H  | 2.27003500  | -4.23223400 | 2.11919100  |
| O  | 0.99890100  | -4.63627500 | 0.62579000  |
| O  | -1.41628000 | -4.45125200 | -0.85838500 |
| C  | 0.79247800  | -5.33833200 | -0.58664800 |
| H  | 1.35970000  | -6.27962700 | -0.58718700 |
| H  | 1.11582000  | -4.73983700 | -1.45021300 |
| C  | -0.68361700 | -5.65370200 | -0.68830200 |
| H  | -0.99807800 | -6.16223400 | 0.23273300  |
| H  | -0.86471900 | -6.32681400 | -1.53701700 |
| O  | 0.03154400  | 1.48207700  | 2.18565300  |
| C  | -0.84639100 | 1.60602400  | 3.10160700  |
| O  | -2.01772800 | 1.95340000  | 3.02178500  |
| O  | -0.38105100 | 1.32732800  | 4.35788500  |
| C  | 0.96768300  | 0.89214500  | 4.49912000  |
| H  | 1.66767900  | 1.65653300  | 4.15145000  |
| H  | 1.11008500  | 0.71692100  | 5.56618600  |
| H  | 1.14454400  | -0.03286000 | 3.94356800  |

1\_prop\_Z.log

SCF (wB97xd) = -2691.55409192  
E(SCF)+ZPE(0 K)= -2690.996443  
H(298 K)= -2690.956061  
G(298 K)= -2691.070732  
Lowest Frequency = 8.8283cm-1

|    |            |             |             |
|----|------------|-------------|-------------|
| Co | 2.48473900 | 6.37211900  | 23.17419900 |
| K  | 5.77646300 | 7.50889100  | 22.08532700 |
| O  | 1.63268800 | 6.10195600  | 21.47577300 |
| O  | 3.15880300 | 8.05301100  | 22.61409600 |
| O  | 4.02121700 | 5.56064400  | 22.38880100 |
| O  | 4.65208100 | 10.06521100 | 21.94138500 |
| O  | 3.26182500 | 6.46928100  | 24.93000500 |
| O  | 5.83850100 | 5.08761100  | 20.60437700 |
| O  | 8.02859100 | 6.81642600  | 20.49574400 |
| O  | 7.18533700 | 9.58710800  | 20.80183600 |
| O  | 5.31248700 | 7.36471300  | 24.67812600 |
| O  | 0.43885200 | 7.97303500  | 21.04312300 |
| N  | 1.75346500 | 4.68842100  | 23.70920900 |
| N  | 0.93444400 | 7.12648400  | 23.97006700 |

|   |             |             |             |
|---|-------------|-------------|-------------|
| C | 4.05671900  | 4.35088000  | 21.93686000 |
| C | 5.07468800  | 4.02405700  | 20.98052200 |
| C | 2.84973200  | 9.18359200  | 23.15931200 |
| C | 3.66196300  | 10.32341200 | 22.84235300 |
| C | 1.02881200  | 6.94635100  | 20.73555700 |
| C | 0.80445800  | 8.34958400  | 24.31749500 |
| H | -0.09830600 | 8.63663200  | 24.86259300 |
| C | 3.35286600  | 1.99518900  | 21.82726800 |
| H | 2.67398600  | 1.21384700  | 22.15847300 |
| C | 4.38127600  | 6.92663900  | 25.35869900 |
| C | 0.65818100  | 4.85368600  | 24.65733200 |
| H | 1.08870200  | 4.98857400  | 25.65433200 |
| H | -0.00227800 | 3.98185300  | 24.66385100 |
| C | 1.51760800  | 10.67620200 | 24.59441200 |
| H | 0.66722000  | 10.80743100 | 25.25835500 |
| C | 5.22267400  | 2.73746000  | 20.50289000 |
| H | 6.00508100  | 2.50039000  | 19.79056400 |
| C | 3.18284900  | 3.30654200  | 22.33174900 |
| C | 2.34840200  | 11.73494700 | 24.31292600 |
| H | 2.17838400  | 12.70988900 | 24.75622700 |
| C | 2.10559200  | 3.54149500  | 23.26297000 |
| H | 1.54820500  | 2.66431300  | 23.60196600 |
| C | 5.50604600  | 11.12496800 | 21.54927600 |
| H | 6.13553700  | 11.43395000 | 22.39397700 |
| H | 4.91896500  | 11.98789000 | 21.20997800 |
| C | 1.75175100  | 9.39940500  | 24.03069700 |
| C | 3.42794300  | 11.55379600 | 23.42254900 |
| H | 4.07003100  | 12.39860300 | 23.19989500 |
| C | 6.90058200  | 4.87359700  | 19.69207400 |
| H | 6.53107100  | 4.40282500  | 18.77186200 |
| H | 7.66100700  | 4.22462300  | 20.14519400 |
| C | 4.35585600  | 1.70918300  | 20.93089500 |
| H | 4.48731600  | 0.70423300  | 20.54522300 |
| C | 8.08811400  | 9.17918400  | 19.79335700 |
| H | 8.81696800  | 9.97704900  | 19.58717900 |
| H | 7.54436700  | 8.97861200  | 18.85845100 |
| C | -0.08316500 | 6.12098300  | 24.24221600 |
| H | -0.63746800 | 5.94100300  | 23.31480900 |
| H | -0.78012100 | 6.45393800  | 25.01664200 |
| C | 8.84483800  | 7.94947800  | 20.26200600 |
| H | 9.62131900  | 7.71321400  | 19.52002100 |
| H | 9.33282700  | 8.16347900  | 21.21625600 |
| C | 7.49063800  | 6.21733900  | 19.33368400 |
| H | 8.27638900  | 6.06279200  | 18.58042100 |
| H | 6.70908500  | 6.84952700  | 18.88979700 |
| C | 6.35556700  | 10.65488000 | 20.39298000 |
| H | 5.71108700  | 10.33428000 | 19.56137600 |
| H | 6.96424700  | 11.50375400 | 20.04900000 |
| C | 4.48401100  | 6.91624700  | 26.87752900 |
| H | 3.86965600  | 7.73052700  | 27.27574800 |
| H | 5.51684000  | 7.06664400  | 27.19471500 |
| H | 4.09724400  | 5.97982700  | 27.28606400 |
| O | 1.03229500  | 6.61670100  | 19.40738000 |
| C | 1.76628500  | 5.46246000  | 19.00615200 |
| H | 1.32863900  | 4.55203700  | 19.42481000 |
| H | 1.70358100  | 5.43706500  | 17.91754100 |
| H | 2.81113200  | 5.52933100  | 19.32153500 |

1\_Z.log

SCF (wB97xd) = -2616.32777917  
E(SCF)+ZPE(0 K)= -2615.776194  
H(298 K)= -2615.736390

G(298 K)= -2615.850307  
Lowest Frequency = 17.1581cm-1

|    |           |           |           |
|----|-----------|-----------|-----------|
| Co | 2.473756  | 6.418500  | 23.020104 |
| K  | 5.792014  | 7.558927  | 22.009983 |
| O  | 1.587805  | 6.207450  | 21.335570 |
| O  | 3.181676  | 8.109933  | 22.533163 |
| O  | 4.001943  | 5.627662  | 22.195808 |
| O  | 4.699655  | 10.124089 | 21.931437 |
| O  | 3.269660  | 6.439898  | 24.785506 |
| O  | 5.974807  | 5.111954  | 20.601812 |
| O  | 8.148048  | 6.883229  | 20.576770 |
| O  | 7.259157  | 9.653249  | 20.845061 |
| O  | 5.348436  | 7.281485  | 24.586225 |
| O  | 0.418207  | 8.117214  | 21.095771 |
| N  | 1.733528  | 4.725913  | 23.518915 |
| N  | 0.944936  | 7.163351  | 23.862532 |
| C  | 4.114412  | 4.393751  | 21.836885 |
| C  | 5.213035  | 4.046699  | 20.978970 |
| C  | 2.886787  | 9.221958  | 23.119489 |
| C  | 3.712352  | 10.363490 | 22.841293 |
| C  | 0.829554  | 7.029212  | 20.695330 |
| C  | 0.836566  | 8.372968  | 24.259402 |
| H  | -0.058625 | 8.652171  | 24.821070 |
| C  | 3.501774  | 2.009282  | 21.825504 |
| H  | 2.829492  | 1.223391  | 22.159494 |
| C  | 4.394356  | 6.849556  | 25.241153 |
| C  | 0.620886  | 4.870558  | 24.451981 |
| H  | 1.035195  | 4.950464  | 25.462015 |
| H  | -0.053995 | 4.010909  | 24.407371 |
| C  | 1.580452  | 10.679114 | 24.614059 |
| H  | 0.735285  | 10.796571 | 25.287360 |
| C  | 5.436217  | 2.741360  | 20.592051 |
| H  | 6.277336  | 2.491195  | 19.955122 |
| C  | 3.253821  | 3.340521  | 22.240128 |
| C  | 2.420513  | 11.738590 | 24.364204 |
| H  | 2.262669  | 12.699658 | 24.841107 |
| C  | 2.126403  | 3.578791  | 23.108737 |
| H  | 1.573503  | 2.696965  | 23.443783 |
| C  | 5.570434  | 11.183807 | 21.578962 |
| H  | 6.186798  | 11.469121 | 22.441550 |
| H  | 4.997476  | 12.059233 | 21.247290 |
| C  | 1.796164  | 9.419858  | 24.005068 |
| C  | 3.494191  | 11.576198 | 23.462799 |
| H  | 4.144243  | 12.421123 | 23.264652 |
| C  | 7.113491  | 4.880367  | 19.791829 |
| H  | 6.831972  | 4.353121  | 18.871087 |
| H  | 7.848276  | 4.275766  | 20.339064 |
| C  | 4.573178  | 1.708433  | 21.018534 |
| H  | 4.764326  | 0.688237  | 20.704502 |
| C  | 8.169036  | 9.238141  | 19.845809 |
| H  | 8.885693  | 10.042935 | 19.624031 |
| H  | 7.629463  | 9.008720  | 18.915013 |
| C  | -0.092477 | 6.167995  | 24.088896 |
| H  | -0.648406 | 6.040597  | 23.153531 |
| H  | -0.785839 | 6.480753  | 24.875075 |
| C  | 8.943929  | 8.031284  | 20.343911 |
| H  | 9.740178  | 7.802507  | 19.621109 |
| H  | 9.408081  | 8.270294  | 21.304199 |
| C  | 7.703903  | 6.217868  | 19.410819 |
| H  | 8.544796  | 6.042575  | 18.724570 |
| H  | 6.946445  | 6.812020  | 18.880933 |
| C  | 0.461866  | 6.522397  | 19.305516 |

|   |           |           |           |
|---|-----------|-----------|-----------|
| H | 1.344871  | 6.577448  | 18.660601 |
| H | -0.332874 | 7.130992  | 18.871626 |
| H | 0.150515  | 5.475634  | 19.347697 |
| C | 6.439645  | 10.727181 | 20.431559 |
| H | 5.809529  | 10.417672 | 19.584857 |
| H | 7.056781  | 11.578063 | 20.108305 |
| C | 4.480964  | 6.789352  | 26.760635 |
| H | 3.875897  | 7.600711  | 27.178682 |
| H | 5.512493  | 6.910968  | 27.094304 |
| H | 4.073648  | 5.847201  | 27.134919 |

Co\_bowl\_R.log

SCF (wB97xd) = -2809.39118987  
E(SCF)+ZPE(0 K)= -2808.752172  
H(298 K)= -2808.707358  
G(298 K)= -2808.831301  
Lowest Frequency = -526.5618cm-1

|   |           |           |           |
|---|-----------|-----------|-----------|
| O | 0.947437  | -0.037454 | 0.563657  |
| C | 2.222034  | 0.056900  | 0.381572  |
| C | 3.000708  | -1.151817 | 0.370886  |
| C | -3.646824 | -0.872904 | -0.671607 |
| C | -2.894837 | 0.263277  | -0.222420 |
| O | -1.776861 | 0.077981  | 0.414498  |
| C | -3.458984 | 1.539440  | -0.483830 |
| C | -2.791713 | 2.747225  | -0.063869 |
| H | -3.366554 | 3.675520  | -0.110500 |
| N | -1.583320 | 2.804618  | 0.349620  |
| C | -0.964684 | 4.048483  | 0.787471  |
| H | -0.889021 | 4.020234  | 1.878072  |
| H | -1.554554 | 4.918539  | 0.485270  |
| C | 0.424715  | 4.070288  | 0.167071  |
| N | 0.991620  | 2.727216  | 0.307533  |
| C | 2.255600  | 2.546135  | 0.208647  |
| H | 2.889554  | 3.430317  | 0.101457  |
| C | 2.929106  | 1.273562  | 0.199110  |
| C | 4.328203  | 1.276993  | -0.019964 |
| H | 4.833937  | 2.228572  | -0.160219 |
| C | 5.034357  | 0.100220  | -0.071791 |
| C | 4.358909  | -1.122635 | 0.125256  |
| H | 4.929523  | -2.042941 | 0.080217  |
| C | -4.846023 | -0.712697 | -1.343522 |
| H | -5.395453 | -1.578322 | -1.694436 |
| C | -5.382188 | 0.565903  | -1.584986 |
| C | -4.698357 | 1.675572  | -1.147891 |
| H | -5.096510 | 2.672005  | -1.318794 |
| H | -6.326247 | 0.661525  | -2.109717 |
| H | 6.102565  | 0.097613  | -0.257956 |
| H | 0.345282  | 4.294079  | -0.902350 |
| H | 1.063807  | 4.821016  | 0.639752  |
| O | 2.285644  | -2.285925 | 0.618077  |
| O | -3.096632 | -2.089744 | -0.394002 |
| C | -3.638631 | -3.222986 | -1.055814 |
| H | -3.599051 | -3.068758 | -2.141829 |
| H | -4.682479 | -3.381325 | -0.756695 |
| C | -2.859851 | -4.459095 | -0.673851 |
| H | -3.354499 | -5.317734 | -1.149497 |
| H | -2.889172 | -4.607798 | 0.415728  |
| C | 2.942491  | -3.538320 | 0.516670  |
| H | 3.192335  | -3.740461 | -0.533379 |
| H | 3.871780  | -3.543434 | 1.099905  |
| C | 2.043381  | -4.608176 | 1.112421  |



|    |           |           |           |    |           |           |           |
|----|-----------|-----------|-----------|----|-----------|-----------|-----------|
| H  | 2.566660  | -5.572812 | 1.037536  | C  | 4.321614  | 1.339491  | -0.357175 |
| H  | 1.878716  | -4.386466 | 2.170036  | H  | 4.805426  | 2.294174  | -0.544665 |
| O  | 0.756590  | -4.694148 | 0.543761  | C  | 5.033684  | 0.168672  | -0.448999 |
| O  | -1.520342 | -4.348562 | -1.110157 | C  | 4.387246  | -1.056978 | -0.188292 |
| C  | 0.669696  | -5.251372 | -0.753702 | H  | 4.960748  | -1.973583 | -0.263319 |
| H  | 1.251038  | -6.182433 | -0.814270 | C  | -4.786472 | -0.810654 | -1.293735 |
| H  | 1.053669  | -4.553159 | -1.511193 | H  | -5.326657 | -1.693473 | -1.614521 |
| C  | -0.787928 | -5.559876 | -1.016330 | C  | -5.343261 | 0.451684  | -1.570723 |
| H  | -1.170652 | -6.171939 | -0.189076 | C  | -4.670255 | 1.583151  | -1.175326 |
| H  | -0.888717 | -6.131595 | -1.948525 | H  | -5.081835 | 2.568547  | -1.376335 |
| Co | -0.343120 | 1.360341  | 0.394538  | O  | -0.199717 | -0.890328 | -2.015853 |
| O  | -0.321833 | 1.357675  | -1.517866 | C  | -0.313597 | 0.288795  | -2.348625 |
| O  | -0.250610 | -0.838685 | -2.024446 | O  | -0.317402 | 1.316835  | -1.570245 |
| C  | -0.323895 | 0.352153  | -2.325415 | C  | -0.505996 | 0.660412  | -3.812407 |
| C  | -0.466946 | 0.769708  | -3.782483 | H  | 0.073331  | 1.549697  | -4.070813 |
| H  | -0.190048 | -0.051621 | -4.445057 | H  | -0.226607 | -0.172323 | -4.459481 |
| H  | 0.140837  | 1.650987  | -3.999581 | H  | -1.563811 | 0.893615  | -3.974730 |
| H  | -1.513823 | 1.033689  | -3.966919 | H  | -6.292536 | 0.517564  | -2.090616 |
| K  | -0.489134 | -2.240153 | 0.383140  | H  | 6.084972  | 0.173939  | -0.714500 |
| O  | -1.035698 | -2.642268 | 3.018298  | Co | -0.308393 | 1.381683  | 0.341314  |
| C  | -1.037287 | -2.394784 | 4.241598  | K  | -0.379540 | -2.246718 | 0.417318  |
| O  | -0.658660 | -1.302995 | 4.770144  | H  | 0.349097  | 4.337888  | -1.001483 |
| C  | -1.559334 | -3.458040 | 5.204535  | H  | 1.055192  | 4.854889  | 0.549136  |
| C  | -0.136566 | 0.179282  | 3.397412  | O  | 2.370836  | -2.232825 | 0.467212  |
| H  | -1.470266 | -4.455099 | 4.768352  | O  | -3.007804 | -2.137836 | -0.330098 |
| H  | -1.031704 | -3.416315 | 6.160031  | C  | -3.540096 | -3.287828 | -0.971597 |
| H  | -2.619688 | -3.261961 | 5.398080  | H  | -3.538724 | -3.136299 | -2.058654 |
| C  | -1.316978 | 0.991424  | 3.146050  | H  | -4.569910 | -3.470696 | -0.639350 |
| H  | 0.127054  | -0.593517 | 2.695835  | C  | -2.718686 | -4.504444 | -0.618418 |
| H  | 0.597516  | 0.533776  | 4.107505  | H  | -3.215504 | -5.374786 | -1.069809 |
| O  | -0.323053 | 1.587161  | 2.318628  | H  | -2.697231 | -4.651470 | 0.471683  |
| H  | -2.099314 | 0.492329  | 2.573643  | C  | 3.051211  | -3.474656 | 0.400856  |
| C  | -1.850147 | 1.912195  | 4.214216  | H  | 3.292141  | -3.710744 | -0.644345 |
| H  | -2.453347 | 1.345026  | 4.929402  | H  | 3.988440  | -3.436682 | 0.970838  |
| H  | -1.031439 | 2.400180  | 4.751825  | C  | 2.176824  | -4.537115 | 1.044536  |
| H  | -2.483017 | 2.681638  | 3.761325  | H  | 2.720130  | -5.493102 | 1.008429  |

Co\_bowl\_S.log

SCF (wB97xd) = -2809.39064039  
E(SCF)+ZPE(0 K)= -2808.750938  
H(298 K)= -2808.706445  
G(298 K)= -2808.827754  
Lowest Frequency = -542.9304cm<sup>-1</sup>

|   |           |           |           |   |           |           |          |
|---|-----------|-----------|-----------|---|-----------|-----------|----------|
| O | 1.010623  | 0.009251  | 0.526815  | O | -0.019085 | -2.713846 | 3.146821 |
| C | 2.264139  | 0.104742  | 0.218565  | C | 0.616020  | -2.318045 | 4.144867 |
| C | 3.050692  | -1.095711 | 0.158149  | O | 0.577491  | -1.137476 | 4.617657 |
| C | -3.579655 | -0.934221 | -0.627461 | C | 1.554819  | -3.291703 | 4.850836 |
| C | -2.842860 | 0.225075  | -0.209450 | C | -0.277256 | 0.232372  | 3.322563 |
| O | -1.722986 | 0.076288  | 0.432087  | H | 1.241366  | -4.324447 | 4.684327 |
| C | -3.425514 | 1.485146  | -0.514815 | H | 1.610186  | -3.082411 | 5.921343 |
| C | -2.776145 | 2.717091  | -0.138891 | H | 2.560112  | -3.166231 | 4.432586 |
| H | -3.368471 | 3.633183  | -0.204958 | C | 0.684637  | 1.304878  | 3.115140 |
| N | -1.565764 | 2.807361  | 0.260783  | H | -1.098392 | 0.396336  | 4.006224 |
| C | -0.967149 | 4.066163  | 0.681055  | H | -0.340416 | -0.563759 | 2.603136 |
| H | -0.895403 | 4.051487  | 1.772088  | O | -0.386732 | 1.664681  | 2.254086 |
| H | -1.569510 | 4.923006  | 0.365900  | C | 0.945621  | 2.314108  | 4.204744 |
| C | 0.424069  | 4.104064  | 0.065994  | H | 1.591463  | 1.011632  | 2.585111 |
| N | 1.004972  | 2.763903  | 0.194925  | H | 1.647274  | 1.902432  | 4.936345 |
| C | 2.262198  | 2.592607  | 0.019141  | H | 1.383797  | 3.219801  | 3.774211 |
| H | 2.880792  | 3.481177  | -0.132153 | H | 0.016886  | 2.581488  | 4.717467 |
| C | 2.943540  | 1.324571  | -0.031870 |   |           |           |          |

## Co\_Z\_bottom\_R.log

SCF (wB97xd) = -2809.37545570  
E(SCF)+ZPE(0 K)= -2808.761021  
H(298 K)= -2808.716646  
G(298 K)= -2808.837199  
Lowest Frequency = -518.2418cm-1

|    |           |           |           |
|----|-----------|-----------|-----------|
| Co | 5.120248  | 7.611259  | 21.322515 |
| O  | 4.614248  | 5.914052  | 22.027806 |
| O  | 3.654353  | 8.398184  | 22.244003 |
| O  | 3.760001  | 4.023316  | 23.601245 |
| O  | 6.353190  | 7.939245  | 22.752625 |
| O  | 1.353041  | 8.852135  | 23.339132 |
| O  | 0.498880  | 7.240994  | 25.496855 |
| O  | 1.543658  | 4.458638  | 25.337174 |
| O  | 5.251448  | 7.299363  | 24.612188 |
| N  | 5.691811  | 9.276879  | 20.581429 |
| N  | 6.587868  | 6.859730  | 20.374275 |
| C  | 3.162261  | 9.572824  | 22.034563 |
| C  | 1.899048  | 9.885567  | 22.644572 |
| C  | 5.447454  | 4.949555  | 22.262777 |
| C  | 5.030194  | 3.891839  | 23.137236 |
| C  | 7.187553  | 5.771484  | 20.680819 |
| H  | 8.105775  | 5.519300  | 20.144506 |
| C  | 3.167116  | 11.865106 | 21.135107 |
| H  | 3.667341  | 12.627478 | 20.543808 |
| C  | 6.243183  | 7.721758  | 24.016111 |
| C  | 6.995297  | 9.168052  | 19.933590 |
| H  | 7.768326  | 9.290182  | 20.699206 |
| H  | 7.125791  | 9.936506  | 19.166400 |
| C  | 7.573764  | 3.736095  | 21.989862 |
| H  | 8.551755  | 3.674259  | 21.520381 |
| C  | 1.328500  | 11.134338 | 22.508149 |
| H  | 0.381886  | 11.360953 | 22.986209 |
| C  | 3.776120  | 10.592256 | 21.263570 |
| C  | 7.165961  | 2.770019  | 22.878711 |
| H  | 7.815482  | 1.940561  | 23.135733 |
| C  | 5.042899  | 10.380580 | 20.609154 |
| H  | 5.479332  | 11.243547 | 20.099410 |
| C  | 3.213141  | 3.002760  | 24.420403 |
| H  | 3.724653  | 2.983993  | 25.391579 |
| H  | 3.329920  | 2.023934  | 23.937914 |
| C  | 6.730786  | 4.828060  | 21.672294 |
| C  | 5.878731  | 2.848129  | 23.450344 |
| H  | 5.562791  | 2.072199  | 24.138707 |
| C  | 0.088405  | 9.024594  | 23.956178 |
| H  | -0.647691 | 9.384705  | 23.225695 |
| H  | 0.165711  | 9.753010  | 24.773887 |
| C  | 1.966629  | 12.137376 | 21.745948 |
| H  | 1.502076  | 13.112547 | 21.649900 |
| C  | 0.173034  | 4.791192  | 25.471005 |
| H  | -0.347973 | 4.013265  | 26.050232 |
| H  | -0.285762 | 4.850559  | 24.474241 |
| C  | 7.078645  | 7.764085  | 19.343838 |
| H  | 6.413609  | 7.684297  | 18.477712 |
| H  | 8.098548  | 7.512622  | 19.039258 |
| C  | 0.041447  | 6.108537  | 26.215447 |
| H  | -1.011956 | 6.244833  | 26.500763 |
| H  | 0.641992  | 6.070852  | 27.128472 |
| C  | -0.376609 | 7.681988  | 24.472564 |
| H  | -1.394937 | 7.802224  | 24.870467 |
| H  | -0.398134 | 6.960377  | 23.645018 |

|   |           |          |           |
|---|-----------|----------|-----------|
| C | 1.736967  | 3.272403 | 24.593192 |
| H | 1.262183  | 3.374158 | 23.608076 |
| H | 1.288068  | 2.415850 | 25.118226 |
| C | 7.529172  | 8.012796 | 24.777307 |
| H | 8.223746  | 7.181286 | 24.617180 |
| H | 7.330251  | 8.102102 | 25.846276 |
| H | 8.007526  | 8.921444 | 24.405062 |
| K | 2.745876  | 6.542383 | 23.908895 |
| O | 0.850325  | 5.467447 | 22.110508 |
| C | 0.620809  | 4.927012 | 21.009676 |
| O | 1.120691  | 5.285624 | 19.896993 |
| C | -0.300790 | 3.711127 | 20.971159 |
| C | 2.972858  | 6.054291 | 19.345332 |
| H | -0.961350 | 3.698320 | 21.840803 |
| H | -0.888434 | 3.689633 | 20.050560 |
| H | 0.316358  | 2.805838 | 20.994876 |
| C | 2.583004  | 7.279477 | 20.030206 |
| H | 3.038732  | 6.078078 | 18.272098 |
| H | 3.479117  | 5.275495 | 19.894679 |
| O | 3.961723  | 7.503309 | 19.756287 |
| C | 1.543972  | 8.206820 | 19.449005 |
| H | 1.677643  | 9.216691 | 19.848209 |
| H | 1.595419  | 8.241791 | 18.361747 |
| H | 0.552080  | 7.851702 | 19.744048 |
| H | 2.453047  | 7.175657 | 21.111761 |

## Co\_Z\_bottom\_S.log

SCF (wB97xd) = -2809.39874581  
E(SCF)+ZPE(0 K)= -2808.759033  
H(298 K)= -2808.714721  
G(298 K)= -2808.834532  
Lowest Frequency = -506.4068cm-1

|    |          |           |           |
|----|----------|-----------|-----------|
| Co | 5.142753 | 7.644259  | 21.399454 |
| O  | 4.703543 | 5.943533  | 22.134347 |
| O  | 3.720380 | 8.451211  | 22.367460 |
| O  | 3.903309 | 4.028308  | 23.693314 |
| O  | 6.421385 | 8.009597  | 22.778344 |
| O  | 1.405717 | 8.849456  | 23.451812 |
| O  | 0.451174 | 7.111107  | 25.457007 |
| O  | 1.573541 | 4.355530  | 25.270762 |
| O  | 5.342596 | 7.365903  | 24.651277 |
| N  | 5.652427 | 9.307306  | 20.596941 |
| N  | 6.579731 | 6.897235  | 20.389616 |
| C  | 3.190355 | 9.609111  | 22.139682 |
| C  | 1.920949 | 9.890904  | 22.747055 |
| C  | 5.540410 | 4.972319  | 22.310245 |
| C  | 5.155293 | 3.899861  | 23.182667 |
| C  | 7.199310 | 5.809961  | 20.659963 |
| H  | 8.091222 | 5.566104  | 20.077110 |
| C  | 3.107967 | 11.870295 | 21.173491 |
| H  | 3.573848 | 12.629799 | 20.551453 |
| C  | 6.323640 | 7.798259  | 24.045588 |
| C  | 6.936059 | 9.205288  | 19.908156 |
| H  | 7.730539 | 9.342915  | 20.648827 |
| H  | 7.034071 | 9.968073  | 19.130561 |
| C  | 7.649408 | 3.759122  | 21.931501 |
| H  | 8.606731 | 3.702045  | 21.420416 |
| C  | 1.309531 | 11.118190 | 22.588036 |
| H  | 0.359223 | 11.323815 | 23.068362 |
| C  | 3.755307 | 10.620210 | 21.325624 |
| C  | 7.276440 | 2.780290  | 22.822153 |

|   |           |           |           |   |           |           |           |
|---|-----------|-----------|-----------|---|-----------|-----------|-----------|
| H | 7.934727  | 1.946543  | 23.040136 | O | -1.630394 | 2.378363  | 15.899359 |
| C | 5.001472  | 10.409549 | 20.632209 | O | -1.217274 | 5.754533  | 12.293982 |
| H | 5.413782  | 11.266756 | 20.093724 | O | -4.160265 | 7.172224  | 15.559821 |
| C | 3.330014  | 2.957983  | 24.424269 | O | -5.199622 | 5.415871  | 17.471996 |
| H | 3.780219  | 2.898115  | 25.423517 | O | -4.071708 | 2.698501  | 17.278446 |
| H | 3.495415  | 2.006878  | 23.902498 | O | -3.099631 | 4.822982  | 13.122987 |
| C | 6.796346  | 4.857100  | 21.664710 | N | 0.344463  | 7.760197  | 13.115730 |
| C | 6.012529  | 2.850694  | 23.446541 | N | 1.344137  | 5.372432  | 12.971146 |
| H | 5.721297  | 2.066267  | 24.136712 | C | -2.277590 | 7.966923  | 14.393732 |
| C | 0.086675  | 8.944493  | 23.964388 | C | -3.613564 | 8.205352  | 14.862949 |
| H | -0.599222 | 9.303407  | 23.186229 | C | 0.134360  | 3.360790  | 14.709060 |
| H | 0.062313  | 9.641829  | 24.811534 | C | -0.353519 | 2.231401  | 15.450402 |
| C | 1.908801  | 12.121749 | 21.797176 | C | 1.913767  | 4.251669  | 13.215611 |
| H | 1.413542  | 13.079753 | 21.683799 | H | 2.846155  | 4.025234  | 12.691983 |
| C | 0.190496  | 4.657481  | 25.318389 | C | -2.372987 | 10.190535 | 13.334812 |
| H | -0.354208 | 3.847579  | 25.827791 | H | -1.883220 | 10.951205 | 12.733021 |
| H | -0.198572 | 4.748040  | 24.294355 | C | -2.401561 | 5.248823  | 12.204175 |
| C | 7.013912  | 7.797951  | 19.330098 | C | 1.702194  | 7.706155  | 12.583344 |
| H | 6.314327  | 7.700206  | 18.494136 | H | 2.397618  | 7.848953  | 13.416404 |
| H | 8.023800  | 7.557716  | 18.985543 | H | 1.869506  | 8.485936  | 11.834948 |
| C | -0.023167 | 5.941567  | 26.100476 | C | 2.189434  | 2.069760  | 14.304029 |
| H | -1.096471 | 6.042340  | 26.318884 | H | 3.166072  | 2.005673  | 13.831815 |
| H | 0.515896  | 5.881964  | 27.049917 | C | -4.258716 | 9.398528  | 14.601395 |
| C | -0.360714 | 7.563513  | 24.386759 | H | -5.256578 | 9.577691  | 14.985488 |
| H | -1.410825 | 7.627540  | 24.707870 | C | -1.686802 | 8.981395  | 13.599057 |
| H | -0.288575 | 6.878483  | 23.530336 | C | 1.725243  | 1.037609  | 15.084366 |
| C | 1.840108  | 3.195364  | 24.509410 | H | 2.329261  | 0.153071  | 15.253571 |
| H | 1.432648  | 3.317956  | 23.496275 | C | -0.358626 | 8.828324  | 13.058689 |
| H | 1.372729  | 2.315667  | 24.977015 | H | 0.072609  | 9.700715  | 12.560918 |
| C | 7.611465  | 8.114750  | 24.794162 | C | -2.270188 | 1.291154  | 16.546662 |
| H | 8.328659  | 7.307161  | 24.613236 | H | -1.891543 | 1.189414  | 17.571421 |
| H | 7.424311  | 8.184605  | 25.866683 | H | -2.084186 | 0.356198  | 16.003894 |
| H | 8.057832  | 9.042316  | 24.428444 | C | 1.408884  | 3.234272  | 14.103769 |
| K | 2.802562  | 6.510239  | 23.921132 | C | 0.436522  | 1.119083  | 15.655780 |
| O | 1.008472  | 5.471219  | 22.116695 | H | 0.074820  | 0.290692  | 16.254890 |
| C | 0.510793  | 4.915446  | 21.116814 | C | -5.507029 | 7.268814  | 15.992692 |
| O | 1.034313  | 4.866884  | 19.960695 | H | -6.150147 | 7.618996  | 15.175712 |
| C | -0.829386 | 4.203855  | 21.295878 | H | -5.581017 | 7.971143  | 16.832435 |
| C | 2.875033  | 5.910646  | 19.832078 | C | -3.636400 | 10.403492 | 13.832540 |
| H | -1.493889 | 4.809328  | 21.918515 | H | -4.162851 | 11.331362 | 13.638131 |
| H | -1.308223 | 3.986514  | 20.339354 | C | -5.459885 | 2.961928  | 17.344707 |
| H | -0.656003 | 3.258816  | 21.822842 | H | -5.977513 | 2.147268  | 17.872909 |
| C | 2.563519  | 7.318098  | 19.992058 | H | -5.882395 | 3.020798  | 16.330096 |
| H | 3.021269  | 5.506980  | 18.839053 | C | 1.882802  | 6.312812  | 11.995076 |
| H | 3.201900  | 5.365643  | 20.701989 | H | 1.294279  | 6.219496  | 11.076505 |
| O | 3.985050  | 7.317760  | 19.868697 | H | 2.932588  | 6.102394  | 11.771358 |
| C | 1.858453  | 8.086940  | 18.904836 | C | -5.692016 | 4.252371  | 18.112667 |
| H | 2.022729  | 9.160013  | 19.047614 | H | -6.769000 | 4.354082  | 18.308901 |
| H | 2.229194  | 7.799078  | 17.916250 | H | -5.169958 | 4.197955  | 19.071449 |
| H | 0.782579  | 7.892152  | 18.949808 | C | -5.984774 | 5.891936  | 16.398631 |
| H | 2.213047  | 7.569996  | 20.990393 | H | -7.040440 | 5.969243  | 16.696078 |
|   |           |           |           | H | -5.924159 | 5.216691  | 15.533079 |
|   |           |           |           | C | -3.762452 | 1.536009  | 16.538961 |
|   |           |           |           | H | -4.112455 | 1.643298  | 15.501277 |
|   |           |           |           | H | -4.256938 | 0.657379  | 16.978651 |
|   |           |           |           | C | -2.922496 | 5.242093  | 10.772039 |
|   |           |           |           | H | -2.147032 | 4.911085  | 10.077176 |
|   |           |           |           | H | -3.202337 | 6.263596  | 10.494019 |
|   |           |           |           | H | -3.800901 | 4.600736  | 10.686383 |
|   |           |           |           | K | -2.804374 | 4.861096  | 16.035901 |
|   |           |           |           | O | -1.610842 | 5.270619  | 18.441414 |
|   |           |           |           | C | -0.713308 | 5.486282  | 19.280639 |
|   |           |           |           | O | 0.504667  | 5.722930  | 19.005685 |

Co\_Z\_top\_R.log

SCF (wB97xd) = -2809.39218667  
E(SCF)+ZPE(0 K)= -2808.753136  
H(298 K)= -2808.708267  
G(298 K)= -2808.832643  
Lowest Frequency = -521.2920cm-1

|    |           |          |           |
|----|-----------|----------|-----------|
| Co | -0.184536 | 6.086030 | 13.867034 |
| O  | -0.625132 | 4.402542 | 14.636248 |
| O  | -1.684393 | 6.871371 | 14.747812 |

|   |           |          |           |
|---|-----------|----------|-----------|
| C | -1.064078 | 5.440007 | 20.765524 |
| C | 0.885146  | 5.796681 | 16.950693 |
| H | -2.143439 | 5.507664 | 20.914480 |
| H | -0.712454 | 4.489778 | 21.181494 |
| H | -0.559621 | 6.244191 | 21.306835 |
| C | 0.630655  | 7.155983 | 16.501794 |
| H | 0.115322  | 5.056070 | 16.814616 |
| H | 1.900557  | 5.493990 | 17.164149 |
| O | 1.040378  | 6.482042 | 15.317579 |
| H | -0.422662 | 7.436755 | 16.487539 |
| C | 1.545892  | 8.282225 | 16.909004 |
| H | 1.286500  | 8.630622 | 17.913171 |
| H | 2.590116  | 7.955161 | 16.907356 |
| H | 1.437260  | 9.119105 | 16.212164 |

Co\_Z\_top\_S.log

SCF (wB97xd) = -2809.39194122  
 E(SCF)+ZPE(0 K)= -2808.752929  
 H(298 K)= -2808.708059  
 G(298 K)= -2808.832655  
 Lowest Frequency = -511.8462cm-1

|    |           |           |           |
|----|-----------|-----------|-----------|
| Co | -0.281214 | 6.057260  | 13.987148 |
| O  | -0.745735 | 4.311588  | 14.579932 |
| O  | -1.811759 | 6.778720  | 14.871759 |
| O  | -1.736133 | 2.231227  | 15.758593 |
| O  | -1.252395 | 5.860732  | 12.354793 |
| O  | -4.320463 | 6.998834  | 15.598614 |
| O  | -5.363562 | 5.164205  | 17.420990 |
| O  | -4.184655 | 2.477092  | 17.149354 |
| O  | -3.169914 | 4.895286  | 13.055145 |
| N  | 0.269598  | 7.784221  | 13.383653 |
| N  | 1.285894  | 5.417317  | 13.097014 |
| C  | -2.409149 | 7.881837  | 14.550301 |
| C  | -3.767547 | 8.073481  | 14.973574 |
| C  | 0.038667  | 3.286579  | 14.649953 |
| C  | -0.444729 | 2.125085  | 15.341204 |
| C  | 1.860029  | 4.288122  | 13.284836 |
| H  | 2.812180  | 4.104981  | 12.780348 |
| C  | -2.501602 | 10.153439 | 13.599703 |
| H  | -2.001205 | 10.952161 | 13.059000 |
| C  | -2.441888 | 5.383029  | 12.193038 |
| C  | 1.646411  | 7.772925  | 12.901810 |
| H  | 2.310361  | 7.848945  | 13.768626 |
| H  | 1.840681  | 8.609029  | 12.224047 |
| C  | 2.142980  | 2.065279  | 14.287366 |
| H  | 3.139511  | 2.043368  | 13.854724 |
| C  | -4.425009 | 9.266041  | 14.740919 |
| H  | -5.442201 | 9.408457  | 15.087981 |
| C  | -1.803687 | 8.945164  | 13.834714 |
| C  | 1.676706  | 0.996477  | 15.015509 |
| H  | 2.297448  | 0.122729  | 15.180082 |
| C  | -0.448960 | 8.842767  | 13.350316 |
| H  | -0.011497 | 9.747339  | 12.919923 |
| C  | -2.357995 | 1.120022  | 16.382360 |
| H  | -1.978573 | 1.003059  | 17.405265 |
| H  | -2.155601 | 0.200127  | 15.820054 |
| C  | 1.339875  | 3.215292  | 14.095912 |
| C  | 0.366861  | 1.027190  | 15.541574 |
| H  | 0.007440  | 0.172545  | 16.103987 |
| C  | -5.678846 | 7.057644  | 15.999563 |
| H  | -6.308372 | 7.423199  | 15.178636 |

|   |           |           |           |
|---|-----------|-----------|-----------|
| H | -5.786602 | 7.730175  | 16.859892 |
| C | -3.790154 | 10.318229 | 14.049396 |
| H | -4.326371 | 11.244728 | 13.876247 |
| C | -5.578513 | 2.712049  | 17.214636 |
| H | -6.082982 | 1.871656  | 17.714369 |
| H | -5.995505 | 2.793350  | 16.199371 |
| C | 1.851804  | 6.429727  | 12.212757 |
| H | 1.293465  | 6.406970  | 11.271363 |
| H | 2.909065  | 6.238566  | 12.008171 |
| C | -5.842525 | 3.973471  | 18.019120 |
| H | -6.923554 | 4.049287  | 18.204909 |
| H | -5.331107 | 3.898988  | 18.982325 |
| C | -6.138801 | 5.659345  | 16.349295 |
| H | -7.201076 | 5.706881  | 16.629023 |
| H | -6.048985 | 5.014415  | 15.463372 |
| C | -3.853639 | 1.340754  | 16.378388 |
| H | -4.203603 | 1.471048  | 15.343402 |
| H | -4.334199 | 0.442345  | 16.792679 |
| C | -2.921661 | 5.501155  | 10.751304 |
| H | -3.147879 | 6.551163  | 10.538608 |
| H | -3.823555 | 4.906746  | 10.597583 |
| H | -2.141257 | 5.184124  | 10.055210 |
| K | -2.918935 | 4.706994  | 16.039991 |
| O | -1.877686 | 5.316046  | 18.476294 |
| C | -1.277837 | 5.978919  | 19.346818 |
| O | -0.355984 | 6.823622  | 19.122058 |
| C | -1.634994 | 5.757095  | 20.815153 |
| C | 0.206327  | 6.927625  | 17.094950 |
| H | -1.592468 | 6.695339  | 21.373281 |
| H | -2.624977 | 5.306934  | 20.912946 |
| H | -0.899518 | 5.074687  | 21.255110 |
| C | 0.745026  | 5.627552  | 16.741140 |
| H | 0.883135  | 7.727989  | 17.359863 |
| H | -0.819464 | 7.140653  | 16.841787 |
| O | 0.855225  | 6.372970  | 15.533021 |
| C | 2.063555  | 5.157327  | 17.298144 |
| H | 1.920166  | 4.771639  | 18.312043 |
| H | 2.461863  | 4.351977  | 16.672630 |
| H | 2.789068  | 5.975845  | 17.330433 |
| H | -0.002169 | 4.837578  | 16.702142 |

Co\_bowl\_R.log

SCF (wB97xd) = -2884.61744522  
 E(SCF)+ZPE(0 K)= -2883.972485  
 H(298 K)= -2883.927068  
 G(298 K)= -2884.052225  
 Lowest Frequency = -543.7792cm-1

|   |           |           |           |
|---|-----------|-----------|-----------|
| O | 0.961337  | -0.028834 | 0.554092  |
| C | 2.234785  | 0.066763  | 0.363659  |
| C | 3.014884  | -1.140906 | 0.352862  |
| C | -3.641574 | -0.876249 | -0.643605 |
| C | -2.887218 | 0.263125  | -0.206467 |
| O | -1.763714 | 0.082165  | 0.421917  |
| C | -3.455095 | 1.537261  | -0.469466 |
| C | -2.786191 | 2.748061  | -0.060707 |
| H | -3.362658 | 3.675329  | -0.107869 |
| N | -1.574968 | 2.809190  | 0.343661  |
| C | -0.955197 | 4.055832  | 0.771649  |
| H | -0.872257 | 4.032040  | 1.861796  |
| H | -1.548285 | 4.923707  | 0.469458  |
| C | 0.430096  | 4.076818  | 0.142044  |

N 0.999970 2.735306 0.285125  
 C 2.263489 2.555514 0.179526  
 H 2.895631 3.439989 0.064188  
 C 2.938770 1.283643 0.171660  
 C 4.336385 1.287942 -0.056437  
 H 4.839967 2.239570 -0.203928  
 C 5.043827 0.111855 -0.108043  
 C 4.371430 -1.111107 0.098290  
 H 4.942869 -2.030895 0.053111  
 C -4.846599 -0.720950 -1.306137  
 H -5.397909 -1.589010 -1.647963  
 C -5.386338 0.555801 -1.549489  
 C -4.700166 1.668470 -1.123823  
 H -5.101050 2.663550 -1.296273  
 H -6.334956 0.647654 -2.066627  
 H 6.110798 0.109989 -0.301189  
 H 0.343373 4.295343 -0.927904  
 H 1.071125 4.830783 0.606909  
 O 2.302564 -2.274685 0.609310  
 O -3.087382 -2.090942 -0.364516  
 C -3.635016 -3.228882 -1.013632  
 H -3.605769 -3.081964 -2.100987  
 H -4.675888 -3.385575 -0.703527  
 C -2.852062 -4.462011 -0.630542  
 H -3.351392 -5.324320 -1.094485  
 H -2.869939 -4.602273 0.460331  
 C 2.959329 -3.527254 0.508341  
 H 3.201102 -3.733865 -0.542721  
 H 3.893047 -3.529327 1.084492  
 C 2.064842 -4.594526 1.115620  
 H 2.587655 -5.559454 1.041822  
 H 1.907542 -4.367603 2.173261  
 O 0.774105 -4.683241 0.556342  
 O -1.517087 -4.354741 -1.081747  
 C 0.676987 -5.252688 -0.735138  
 H 1.258264 -6.184022 -0.791562  
 H 1.054636 -4.561535 -1.502270  
 C -0.782593 -5.564531 -0.983016  
 H -1.157891 -6.169368 -0.147125  
 H -0.890557 -6.144688 -1.909159  
 Co -0.332318 1.367125 0.388063  
 O -0.323844 1.356439 -1.526047  
 O -0.255976 -0.840934 -2.028268  
 C -0.332117 0.349484 -2.331209  
 C -0.487012 0.763164 -3.788206  
 H -0.216027 -0.059988 -4.450969  
 H 0.119369 1.643573 -4.012661  
 H -1.535247 1.027233 -3.964662  
 K -0.470766 -2.232018 0.376097  
 O -1.020583 -2.625616 3.016983  
 C -1.010573 -2.326239 4.217009  
 O -0.591069 -1.262239 4.754450  
 C -0.083125 0.182399 3.410066  
 C -1.267643 0.988396 3.145018  
 H 0.201523 -0.573080 2.696253  
 H 0.652540 0.561477 4.106260  
 O -0.298642 1.604385 2.308478  
 H -2.047025 0.473531 2.581832  
 C -1.813221 1.900241 4.215686  
 H -2.402428 1.323180 4.934744  
 H -1.001265 2.404889 4.748279  
 H -2.462144 2.656759 3.763873  
 O -1.519622 -3.278747 5.058916

C -1.546347 -2.989824 6.451946  
 H -2.152186 -2.103662 6.660263  
 H -1.994185 -3.863472 6.927068  
 H -0.537127 -2.833002 6.842595

Co\_bowl\_S.log

SCF (wB97xd) = -2884.616559  
 E(SCF)+ZPE(0 K)= -2883.971114  
 H(298 K)= -2883.925805  
 G(298 K)= -2884.049767  
 Lowest Frequency = -546.8035cm<sup>-1</sup>

O 1.004697 0.039070 0.495373  
 C 2.260272 0.147899 0.200328  
 C 3.061230 -1.043731 0.163183  
 C -3.573507 -0.956680 -0.635800  
 C -2.849591 0.211560 -0.219882  
 O -1.724600 0.076720 0.416166  
 C -3.448856 1.464598 -0.521981  
 C -2.811181 2.705048 -0.152896  
 H -3.414000 3.614236 -0.219219  
 N -1.599425 2.810575 0.238765  
 C -1.009902 4.077870 0.645979  
 H -0.927756 4.070664 1.736354  
 H -1.623551 4.926715 0.331015  
 C 0.375306 4.125287 0.017686  
 N 0.972429 2.793353 0.155770  
 C 2.231331 2.634173 -0.019435  
 H 2.840294 3.527955 -0.178847  
 C 2.927039 1.373152 -0.056637  
 C 4.307403 1.400003 -0.371545  
 H 4.781919 2.357974 -0.565857  
 C 5.033580 0.236437 -0.444148  
 C 4.399912 -0.993719 -0.173021  
 H 4.984854 -1.904329 -0.231068  
 C -4.784324 -0.847782 -1.297269  
 H -5.314246 -1.737028 -1.617446  
 C -5.358189 0.407738 -1.570203  
 C -4.697708 1.547319 -1.176723  
 H -5.122456 2.527593 -1.375446  
 O -0.205155 -0.870427 -2.052437  
 C -0.339661 0.308579 -2.379245  
 O -0.348542 1.333128 -1.597206  
 C -0.554958 0.681831 -3.839362  
 H -1.617828 0.900911 -3.987817  
 H 0.008790 1.579854 -4.101941  
 H -0.272177 -0.144965 -4.492556  
 H -6.310410 0.462255 -2.086009  
 H 6.086781 0.250996 -0.701606  
 Co -0.326482 1.399676 0.316067  
 K -0.355591 -2.231417 0.354077  
 H 0.287697 4.346310 -1.051550  
 H 1.002103 4.888580 0.486658  
 O 2.391260 -2.183802 0.482809  
 O -2.985420 -2.153332 -0.341258  
 C -3.503271 -3.311389 -0.980598  
 H -3.499630 -3.163881 -2.068196  
 H -4.532226 -3.503696 -0.651220  
 C -2.672087 -4.518965 -0.617661  
 H -3.161962 -5.396769 -1.062061  
 H -2.650786 -4.656055 0.473677  
 C 3.083640 -3.420391 0.431266

H 3.332557 -3.662218 -0.610766  
H 4.017100 -3.368358 1.006230  
C 2.214395 -4.484102 1.079626  
H 2.765553 -5.436029 1.053223  
H 2.029607 -4.208862 2.121476  
O 0.934551 -4.634835 0.506337  
O -1.356312 -4.376496 -1.113473  
C 0.867025 -5.208610 -0.783003  
H 1.477380 -6.121631 -0.836754  
H 1.225956 -4.506866 -1.549838  
C -0.582328 -5.564138 -1.036065  
H -0.936717 -6.194049 -0.209891  
H -0.674207 -6.131421 -1.971625  
O -0.138838 -2.737924 3.105752  
C 0.627332 -2.318327 3.980725  
O 0.696951 -1.149435 4.460240  
C -0.226380 0.211617 3.279494  
C 0.688105 1.327011 3.072513  
H -1.044438 0.339248 3.975426  
H -0.301891 -0.546082 2.520817  
O -0.394313 1.686657 2.229073  
C 0.932071 2.313119 4.188112  
H 1.601445 1.074992 2.532155  
H 1.648941 1.899882 4.904052  
H 1.344694 3.240309 3.778847  
H 0.000632 2.544122 4.713537  
C 2.452388 -2.804107 5.448685  
H 3.050641 -3.681949 5.695535  
H 3.096799 -2.018344 5.044589  
H 1.953412 -2.431581 6.347374  
O 1.507548 -3.240879 4.478365

Co\_Z\_bottom\_R.log

SCF (wB97xd) = -2884.62666366  
E(SCF)+ZPE(0 K)= -2883.981036  
H(298 K)= -2883.936047  
G(298 K)= -2884.057402  
Lowest Frequency = -540.1861cm-1

Co 5.107095 7.648819 21.283895  
O 4.549835 5.951128 21.950560  
O 3.635433 8.439261 22.190950  
O 3.630292 4.036744 23.459473  
O 6.336834 7.941780 22.730417  
O 1.347629 8.921530 23.301285  
O 0.490738 7.310237 25.454191  
O 1.452387 4.501455 25.232499  
O 5.224999 7.287645 24.577636  
N 5.701801 9.312820 20.564367  
N 6.564320 6.884434 20.326344  
C 3.161863 9.624933 21.994946  
C 1.905304 9.950933 22.610442  
C 5.340688 4.940649 22.133385  
C 4.887051 3.867745 22.971416  
C 7.109196 5.753577 20.576377  
H 8.013443 5.483646 20.025126  
C 3.199795 11.923723 21.113970  
H 3.711234 12.683814 20.529433  
C 6.222343 7.710351 23.989816  
C 7.015921 9.197032 19.939782  
H 7.773606 9.295461 20.723881  
H 7.172409 9.977333 19.189618

C 7.408778 3.646197 21.787980  
H 8.378730 3.561379 21.305532  
C 1.352075 11.208700 22.482941  
H 0.409996 11.446020 22.964604  
C 3.791500 10.642094 21.234235  
C 6.967117 2.662661 22.640474  
H 7.581247 1.795171 22.855471  
C 5.062085 10.421900 20.589318  
H 5.512382 11.283875 20.090097  
C 3.053710 3.010916 24.251566  
H 3.577374 2.939620 25.213870  
H 3.126011 2.045125 23.735213  
C 6.612824 4.787342 21.526170  
C 5.691344 2.775658 23.231631  
H 5.348814 1.987840 23.893146  
C 0.094192 9.115006 23.934961  
H -0.643865 9.493793 23.216061  
H 0.196386 9.836957 24.755665  
C 2.002765 12.207598 21.726356  
H 1.551399 13.189579 21.637162  
C 0.096472 4.871412 25.405699  
H -0.432984 4.100489 25.986617  
H -0.386757 4.957695 24.422826  
C 7.092394 7.803643 19.325978  
H 6.447443 7.750941 18.443183  
H 8.115731 7.543047 19.041126  
C 0.020156 6.181499 26.170154  
H -1.021730 6.342923 26.483360  
H 0.641923 6.115615 27.067196  
C -0.391497 7.778983 24.448405  
H -1.400334 7.917891 24.863974  
H -0.442375 7.066374 23.614844  
C 1.591297 3.329037 24.453380  
H 1.104086 3.471496 23.479543  
H 1.121441 2.475368 24.964977  
C 7.506404 7.984640 24.760922  
H 7.304318 8.056244 25.830639  
H 7.987550 8.898805 24.405972  
H 8.200551 7.155203 24.588979  
K 2.719009 6.582939 23.862284  
O 0.680721 5.610791 22.149908  
C 0.510941 5.008390 21.083175  
O 0.925268 5.323595 19.931458  
C 2.373595 6.757183 19.954165  
C 3.539201 6.221445 19.264247  
H 2.348050 6.737427 21.030637  
H 1.739003 7.454677 19.424291  
O 4.020969 7.487594 19.693224  
H 4.019888 5.382472 19.769268  
C 3.515767 6.065220 17.764039  
H 2.967708 5.158269 17.491506  
H 3.032840 6.925437 17.290887  
H 4.537649 5.980452 17.382162  
O -0.219772 3.853606 21.178319  
C -0.414923 3.090312 19.993452  
H 0.540445 2.765553 19.571924  
H -1.000600 2.220762 20.294231  
H -0.962560 3.662458 19.239594

Co\_Z\_bottom\_S.log

SCF (wB97xd) = -2884.62462135  
E(SCF)+ZPE(0 K)= -2883.979168

H(298 K)= -2883.934076  
G(298 K)= -2884.056173  
Lowest Frequency = -524.8654cm-1

|    |           |           |           |
|----|-----------|-----------|-----------|
| Co | 5.137870  | 7.679803  | 21.409056 |
| O  | 4.702292  | 5.960893  | 22.105443 |
| O  | 3.713320  | 8.460370  | 22.395309 |
| O  | 3.910814  | 4.009196  | 23.621593 |
| O  | 6.417537  | 8.017063  | 22.796354 |
| O  | 1.391938  | 8.820355  | 23.476627 |
| O  | 0.475039  | 7.056553  | 25.472427 |
| O  | 1.602619  | 4.309576  | 25.231487 |
| O  | 5.342199  | 7.334135  | 24.657025 |
| N  | 5.643319  | 9.362317  | 20.645488 |
| N  | 6.578035  | 6.960839  | 20.383068 |
| C  | 3.174512  | 9.617867  | 22.185202 |
| C  | 1.901043  | 9.878697  | 22.792812 |
| C  | 5.543910  | 4.989377  | 22.260041 |
| C  | 5.163383  | 3.896877  | 23.108750 |
| C  | 7.200829  | 5.869876  | 20.629199 |
| H  | 8.094182  | 5.642105  | 20.042031 |
| C  | 3.078059  | 11.895177 | 21.259777 |
| H  | 3.540282  | 12.669454 | 20.653433 |
| C  | 6.321820  | 7.780833  | 24.058950 |
| C  | 6.928957  | 9.280403  | 19.957990 |
| H  | 7.721134  | 9.401271  | 20.703968 |
| H  | 7.027343  | 10.062301 | 19.199669 |
| C  | 7.657679  | 3.793440  | 21.855315 |
| H  | 8.615248  | 3.751414  | 21.343256 |
| C  | 1.280383  | 11.103804 | 22.653790 |
| H  | 0.326701  | 11.293368 | 23.133976 |
| C  | 3.734621  | 10.647717 | 21.391751 |
| C  | 7.288862  | 2.793962  | 22.724578 |
| H  | 7.950677  | 1.958489  | 22.924494 |
| C  | 4.985392  | 10.459467 | 20.699862 |
| H  | 5.394252  | 11.329964 | 20.180430 |
| C  | 3.349438  | 2.926762  | 24.344142 |
| H  | 3.812742  | 2.853964  | 25.336547 |
| H  | 3.510638  | 1.983722  | 23.806618 |
| C  | 6.800197  | 4.893363  | 21.612267 |
| C  | 6.024821  | 2.845566  | 23.350098 |
| H  | 5.736828  | 2.045059  | 24.022876 |
| C  | 0.079585  | 8.905208  | 24.007616 |
| H  | -0.618341 | 9.269729  | 23.242890 |
| H  | 0.064426  | 9.593150  | 24.862603 |
| C  | 1.874631  | 12.125952 | 21.883365 |
| H  | 1.372282  | 13.081954 | 21.785349 |
| C  | 0.219171  | 4.604266  | 25.309639 |
| H  | -0.311560 | 3.786145  | 25.820505 |
| H  | -0.190726 | 4.703868  | 24.294816 |
| C  | 7.011032  | 7.887644  | 19.345928 |
| H  | 6.312386  | 7.808491  | 18.507213 |
| H  | 8.021799  | 7.658218  | 18.996587 |
| C  | 0.015579  | 5.878092  | 26.110816 |
| H  | -1.053870 | 5.973012  | 26.349470 |
| H  | 0.571961  | 5.809367  | 27.049565 |
| C  | -0.355826 | 7.517857  | 24.420784 |
| H  | -1.400966 | 7.573355  | 24.759004 |
| H  | -0.295643 | 6.843697  | 23.555185 |
| C  | 1.860320  | 3.158834  | 24.452455 |
| H  | 1.436416  | 3.291309  | 23.447389 |
| H  | 1.402834  | 2.272564  | 24.917374 |
| C  | 7.609249  | 8.085276  | 24.813152 |

|   |           |          |           |
|---|-----------|----------|-----------|
| H | 8.326513  | 7.280725 | 24.619349 |
| H | 7.421745  | 8.137328 | 25.886634 |
| H | 8.055707  | 9.018749 | 24.462935 |
| K | 2.813465  | 6.487687 | 23.919040 |
| O | 0.972548  | 5.443084 | 22.086545 |
| C | 0.535628  | 4.953800 | 21.039109 |
| O | 1.077513  | 4.916513 | 19.898553 |
| C | 2.870449  | 5.944019 | 19.802741 |
| C | 2.565375  | 7.349431 | 20.009833 |
| H | 3.026077  | 5.581114 | 18.795322 |
| H | 3.231666  | 5.381456 | 20.648744 |
| O | 3.981806  | 7.386838 | 19.874657 |
| C | 1.831768  | 8.138884 | 18.955612 |
| H | 1.980832  | 9.209541 | 19.129346 |
| H | 2.193996  | 7.887708 | 17.953913 |
| H | 0.759850  | 7.924852 | 19.008634 |
| H | 2.218530  | 7.568396 | 21.017788 |
| O | -0.705954 | 4.376154 | 21.146198 |
| C | -1.276573 | 3.802652 | 19.976595 |
| H | -0.652702 | 2.993277 | 19.587323 |
| H | -2.245861 | 3.406576 | 20.282578 |
| H | -1.415070 | 4.554161 | 19.194110 |

Co\_Z\_top\_R.log

SCF (wB97xd) = -2884.61836543  
E(SCF)+ZPE(0 K)= -2883.973458  
H(298 K)= -2883.927904  
G(298 K)= -2884.054266  
Lowest Frequency = -543.8637cm-1

|    |           |           |           |
|----|-----------|-----------|-----------|
| Co | -0.181486 | 6.081982  | 13.857960 |
| O  | -0.619517 | 4.397853  | 14.629023 |
| O  | -1.674882 | 6.868227  | 14.749655 |
| O  | -1.618982 | 2.372814  | 15.894892 |
| O  | -1.226766 | 5.754373  | 12.290633 |
| O  | -4.145340 | 7.172986  | 15.577134 |
| O  | -5.180445 | 5.408876  | 17.483561 |
| O  | -4.056274 | 2.692042  | 17.280075 |
| O  | -3.105033 | 4.823768  | 13.129388 |
| N  | 0.344732  | 7.756047  | 13.104282 |
| N  | 1.338740  | 5.366501  | 12.949109 |
| C  | -2.267198 | 7.966682  | 14.402963 |
| C  | -3.599531 | 8.207328  | 14.881327 |
| C  | 0.138680  | 3.354448  | 14.693774 |
| C  | -0.345527 | 2.224592  | 15.436693 |
| C  | 1.908286  | 4.244602  | 13.187913 |
| H  | 2.836189  | 4.017033  | 12.656821 |
| C  | -2.363095 | 10.194127 | 13.352195 |
| H  | -1.875115 | 10.955277 | 12.749559 |
| C  | -2.412386 | 5.251568  | 12.207117 |
| C  | 1.698109  | 7.699907  | 12.561314 |
| H  | 2.400121  | 7.840085  | 13.389248 |
| H  | 1.861267  | 8.480334  | 11.812669 |
| C  | 2.188559  | 2.060931  | 14.271555 |
| H  | 3.161521  | 1.995990  | 13.791931 |
| C  | -4.242630 | 9.403540  | 14.628669 |
| H  | -5.237353 | 9.584305  | 15.020075 |
| C  | -1.678893 | 8.981956  | 13.607465 |
| C  | 1.728703  | 1.028355  | 15.054003 |
| H  | 2.332721  | 0.142745  | 15.217522 |
| C  | -0.355507 | 8.826381  | 13.056027 |
| H  | 0.074235  | 9.698866  | 12.557110 |

|   |           |           |           |   |           |           |           |
|---|-----------|-----------|-----------|---|-----------|-----------|-----------|
| C | -2.257091 | 1.284714  | 16.542624 | O | -4.293294 | 7.008878  | 15.624021 |
| H | -1.875422 | 1.181617  | 17.566079 | O | -5.337658 | 5.168007  | 17.438564 |
| H | -2.072842 | 0.350517  | 15.998021 | O | -4.166697 | 2.479432  | 17.157774 |
| C | 1.408373  | 3.226865  | 14.078704 | O | -3.180943 | 4.907079  | 13.074774 |
| C | 0.444406  | 1.110853  | 15.634977 | N | 0.280484  | 7.774618  | 13.367265 |
| H | 0.085878  | 0.282259  | 16.235712 | N | 1.278904  | 5.402435  | 13.063128 |
| C | -5.489895 | 7.271100  | 16.016671 | C | -2.385143 | 7.884882  | 14.563754 |
| H | -6.135673 | 7.627663  | 15.204577 | C | -3.739569 | 8.081907  | 14.997012 |
| H | -5.557884 | 7.968931  | 16.860631 | C | 0.042967  | 3.278020  | 14.633125 |
| C | -3.622315 | 10.409427 | 13.859471 | C | -0.436160 | 2.119181  | 15.331556 |
| H | -4.147067 | 11.339699 | 13.672074 | C | 1.852107  | 4.272152  | 13.246597 |
| C | -5.444269 | 2.956155  | 17.349431 | H | 2.797773  | 4.085122  | 12.731421 |
| H | -5.961507 | 2.140164  | 17.875914 | C | -2.475387 | 10.157669 | 13.615630 |
| H | -5.868287 | 3.018618  | 16.335630 | H | -1.975912 | 10.954420 | 13.071191 |
| C | 1.871373  | 6.306993  | 11.969911 | C | -2.460082 | 5.391999  | 12.204586 |
| H | 1.275195  | 6.215921  | 11.056067 | C | 1.650838  | 7.755785  | 12.867847 |
| H | 2.918916  | 6.094847  | 11.737426 | H | 2.326243  | 7.824887  | 13.726354 |
| C | -5.673858 | 4.244386  | 18.121743 | H | 1.841999  | 8.592430  | 12.189851 |
| H | -6.750429 | 4.347067  | 18.319547 | C | 2.141387  | 2.052029  | 14.253772 |
| H | -5.150770 | 4.186354  | 19.079696 | H | 3.133609  | 2.026956  | 13.811496 |
| C | -5.969904 | 5.893417  | 16.417224 | C | -4.393409 | 9.277906  | 14.771295 |
| H | -7.023657 | 5.972526  | 16.720875 | H | -5.407177 | 9.424298  | 15.126617 |
| H | -5.916347 | 5.222825  | 15.547539 | C | -1.781219 | 8.945993  | 13.843584 |
| C | -3.749347 | 1.529739  | 16.539376 | C | 1.680443  | 0.986393  | 14.990040 |
| H | -4.102304 | 1.637390  | 15.502711 | H | 2.301459  | 0.112293  | 15.151711 |
| H | -4.242702 | 0.651053  | 16.980216 | C | -0.432211 | 8.837209  | 13.344322 |
| C | -2.943598 | 5.250408  | 10.778745 | H | 0.005167  | 9.740144  | 12.910387 |
| H | -2.174781 | 4.916343  | 10.077950 | C | -2.343574 | 1.118961  | 16.388733 |
| H | -3.219508 | 6.273958  | 10.504375 | H | -1.960186 | 1.004909  | 17.410444 |
| H | -3.826104 | 4.614066  | 10.697959 | H | -2.143602 | 0.197480  | 15.828210 |
| K | -2.798325 | 4.852858  | 16.028242 | C | 1.338462  | 3.202775  | 14.066510 |
| O | -1.598123 | 5.265903  | 18.441803 | C | 0.375640  | 1.020723  | 15.528157 |
| C | -0.679045 | 5.526781  | 19.226940 | H | 0.020161  | 0.168536  | 16.096776 |
| O | 0.541317  | 5.720850  | 18.962743 | C | -5.650432 | 7.070666  | 16.029021 |
| C | 0.908139  | 5.773300  | 16.956240 | H | -6.280790 | 7.442796  | 15.211722 |
| C | 0.650671  | 7.128668  | 16.489673 | H | -5.753274 | 7.738995  | 16.893172 |
| H | 0.146304  | 5.026418  | 16.802565 | C | -3.759399 | 10.328082 | 14.076256 |
| H | 1.929024  | 5.472483  | 17.146489 | H | -4.292695 | 11.257268 | 13.908572 |
| O | 1.053999  | 6.472364  | 15.297380 | C | -5.560024 | 2.717280  | 17.225032 |
| H | -0.403723 | 7.407774  | 16.485834 | H | -6.065883 | 1.876661  | 17.722947 |
| C | 1.561304  | 8.258240  | 16.900908 | H | -5.977716 | 2.802383  | 16.210310 |
| H | 1.305005  | 8.598774  | 17.908637 | C | 1.838337  | 6.412913  | 12.172785 |
| H | 2.607578  | 7.937737  | 16.891376 | H | 1.266465  | 6.395713  | 11.239439 |
| H | 1.443638  | 9.098445  | 16.209643 | H | 2.891422  | 6.215815  | 11.952779 |
| O | -1.042936 | 5.611257  | 20.544171 | C | -5.820234 | 3.976995  | 18.033384 |
| C | -0.029849 | 5.919494  | 21.494781 | H | -6.900990 | 4.055535  | 18.219470 |
| H | -0.530058 | 5.942730  | 22.463707 | H | -5.308968 | 3.898027  | 18.996234 |
| H | 0.752552  | 5.155625  | 21.500512 | C | -6.114718 | 5.672201  | 16.372541 |
| H | 0.422634  | 6.893366  | 21.288281 | H | -7.175833 | 5.722331  | 16.656143 |

Co\_Z\_top\_S.log

SCF (wB97xd) = -2884.61820526  
E(SCF)+ZPE(0 K)= -2883.973206  
H(298 K)= -2883.927754  
G(298 K)= -2884.052663  
Lowest Frequency = -536.9342cm-1

|    |           |          |           |
|----|-----------|----------|-----------|
| Co | -0.272705 | 6.049764 | 13.975088 |
| O  | -0.740256 | 4.304386 | 14.567617 |
| O  | -1.788955 | 6.779275 | 14.880442 |
| O  | -1.723871 | 2.228376 | 15.759402 |
| O  | -1.266741 | 5.862882 | 12.353425 |

|   |           |           |           |
|---|-----------|-----------|-----------|
| O | -4.293294 | 7.008878  | 15.624021 |
| O | -5.337658 | 5.168007  | 17.438564 |
| O | -4.166697 | 2.479432  | 17.157774 |
| O | -3.180943 | 4.907079  | 13.074774 |
| N | 0.280484  | 7.774618  | 13.367265 |
| N | 1.278904  | 5.402435  | 13.063128 |
| C | -2.385143 | 7.884882  | 14.563754 |
| C | -3.739569 | 8.081907  | 14.997012 |
| C | 0.042967  | 3.278020  | 14.633125 |
| C | -0.436160 | 2.119181  | 15.331556 |
| C | 1.852107  | 4.272152  | 13.246597 |
| H | 2.797773  | 4.085122  | 12.731421 |
| C | -2.475387 | 10.157669 | 13.615630 |
| H | -1.975912 | 10.954420 | 13.071191 |
| C | -2.460082 | 5.391999  | 12.204586 |
| C | 1.650838  | 7.755785  | 12.867847 |
| H | 2.326243  | 7.824887  | 13.726354 |
| H | 1.841999  | 8.592430  | 12.189851 |
| C | 2.141387  | 2.052029  | 14.253772 |
| H | 3.133609  | 2.026956  | 13.811496 |
| C | -4.393409 | 9.277906  | 14.771295 |
| H | -5.407177 | 9.424298  | 15.126617 |
| C | -1.781219 | 8.945993  | 13.843584 |
| C | 1.680443  | 0.986393  | 14.990040 |
| H | 2.301459  | 0.112293  | 15.151711 |
| C | -0.432211 | 8.837209  | 13.344322 |
| H | 0.005167  | 9.740144  | 12.910387 |
| C | -2.343574 | 1.118961  | 16.388733 |
| H | -1.960186 | 1.004909  | 17.410444 |
| H | -2.143602 | 0.197480  | 15.828210 |
| C | 1.338462  | 3.202775  | 14.066510 |
| C | 0.375640  | 1.020723  | 15.528157 |
| H | 0.020161  | 0.168536  | 16.096776 |
| C | -5.650432 | 7.070666  | 16.029021 |
| H | -6.280790 | 7.442796  | 15.211722 |
| H | -5.753274 | 7.738995  | 16.893172 |
| C | -3.759399 | 10.328082 | 14.076256 |
| H | -4.292695 | 11.257268 | 13.908572 |
| C | -5.560024 | 2.717280  | 17.225032 |
| H | -6.065883 | 1.876661  | 17.722947 |
| H | -5.977716 | 2.802383  | 16.210310 |
| C | 1.838337  | 6.412913  | 12.172785 |
| H | 1.266465  | 6.395713  | 11.239439 |
| H | 2.891422  | 6.215815  | 11.952779 |
| C | -5.820234 | 3.976995  | 18.033384 |
| H | -6.900990 | 4.055535  | 18.219470 |
| H | -5.308968 | 3.898027  | 18.996234 |
| C | -6.114718 | 5.672201  | 16.372541 |
| H | -7.175833 | 5.722331  | 16.656143 |
| H | -6.030547 | 5.031941  | 15.482631 |
| C | -3.839201 | 1.340160  | 16.389676 |
| H | -4.192970 | 1.466863  | 15.355514 |
| H | -4.318646 | 0.443500  | 16.809007 |
| C | -2.957222 | 5.515062  | 10.769230 |
| H | -3.195164 | 6.564579  | 10.566876 |
| H | -3.856137 | 4.914496  | 10.621942 |
| H | -2.182462 | 5.209712  | 10.061812 |
| K | -2.913057 | 4.700625  | 16.023339 |
| O | -1.854138 | 5.305968  | 18.469580 |
| C | -1.214435 | 5.968804  | 19.294442 |
| O | -0.293200 | 6.806545  | 19.081900 |
| C | 0.239657  | 6.921617  | 17.100283 |
| C | 0.764522  | 5.621512  | 16.715047 |



|   |           |          |           |
|---|-----------|----------|-----------|
| H | 0.932259  | 7.714648 | 17.347018 |
| H | -0.779275 | 7.153731 | 16.832658 |
| O | 0.883559  | 6.353916 | 15.504243 |
| C | 2.077856  | 5.131410 | 17.269990 |
| H | 1.932051  | 4.745866 | 18.283689 |
| H | 2.462579  | 4.321724 | 16.641686 |
| H | 2.815250  | 5.939363 | 17.301190 |

|   |           |          |           |
|---|-----------|----------|-----------|
| H | 0.009191  | 4.838284 | 16.680720 |
| O | -1.559343 | 5.756241 | 20.604470 |
| C | -0.850594 | 6.478597 | 21.604273 |
| H | -0.984983 | 7.557224 | 21.484123 |
| H | -1.273563 | 6.158387 | 22.557358 |
| H | 0.217735  | 6.246452 | 21.577291 |

## Reaction Profile

### CO2.log

SCF (wB97xd) = -188.574025127  
 E(SCF)+ZPE(0 K)= -188.562314  
 H(298 K)= -188.558737  
 G(298 K)= -188.583009  
 Lowest Frequency = 654.2553cm-1

|   |             |            |             |
|---|-------------|------------|-------------|
| C | -4.08164900 | 0.32622400 | -0.04916100 |
| O | -2.92343100 | 0.32622400 | -0.04916100 |
| O | -5.23986600 | 0.32622400 | -0.04916100 |

### RPO.log

SCF (wB97xd) = -193.085539750  
 E(SCF)+ZPE(0 K)= -192.999177  
 H(298 K)= -192.993859  
 G(298 K)= -193.025528  
 Lowest Frequency = 208.2426cm-1

|   |             |             |             |
|---|-------------|-------------|-------------|
| C | -0.64250000 | -0.26930500 | 0.02021100  |
| C | 0.82141500  | -0.26458500 | -0.00111800 |
| O | 0.08549400  | 0.95843600  | -0.02669100 |
| H | -1.15377400 | -0.49957200 | -0.91463600 |
| H | 1.35376900  | -0.50174100 | -0.91984900 |
| H | 1.36509300  | -0.45360600 | 0.92313100  |
| C | -1.42290800 | -0.54412500 | 1.27629700  |
| H | -2.34429000 | 0.04588900  | 1.29424200  |
| H | -1.69620900 | -1.60282400 | 1.32341100  |
| H | -0.83098800 | -0.29668800 | 2.16211000  |

### SPO.log

SCF (wB97xd) = -193.085539838  
 E(SCF)+ZPE(0 K)= -192.999169  
 H(298 K)= -192.993853  
 G(298 K)= -193.025516  
 Lowest Frequency = 209.7061cm-1

|   |             |             |             |
|---|-------------|-------------|-------------|
| C | -0.64085600 | -0.25811300 | -0.02518400 |
| C | 0.82287700  | -0.27469600 | 0.00092500  |
| O | 0.10518800  | 0.95930600  | 0.00464100  |
| H | 1.36665600  | -0.48660300 | -0.91829100 |
| H | 1.34864900  | -0.50516400 | 0.92514500  |
| C | -1.42171800 | -0.54102400 | -1.27919000 |
| H | -1.71185500 | -1.59582300 | -1.31014800 |
| H | -2.33354100 | 0.06323500  | -1.30944300 |
| H | -0.82346100 | -0.31731500 | -2.16705600 |
| H | -1.15836000 | -0.46578600 | 0.91149500  |

### lCo.log

SCF (wB97xd) = -2884.005056  
 E(SCF)+ZPE(0 K)= -2883.960302  
 H(298 K)= -2883.959358  
 G(298 K)= -2884.082375  
 Lowest Frequency = 24.2992cm-1

|    |             |             |             |
|----|-------------|-------------|-------------|
| Co | 4.52935700  | 6.84434200  | 20.98589500 |
| O  | 3.53465200  | 5.36038700  | 21.64637100 |
| O  | 3.40487600  | 8.00803100  | 21.96656700 |
| O  | 2.30454700  | 3.77725900  | 23.34606900 |
| O  | 5.88124500  | 6.71891800  | 22.29432700 |
| O  | 1.53052500  | 9.13122200  | 23.35458000 |
| O  | 0.55601600  | 7.80612400  | 25.63901000 |
| O  | 0.63808100  | 4.85929600  | 25.37206800 |
| O  | 4.73568500  | 6.40656600  | 24.21013700 |
| N  | 5.52718400  | 8.28042700  | 20.21869000 |
| N  | 5.59971500  | 5.71830200  | 19.88148100 |
| C  | 3.34188900  | 9.29884400  | 21.87894700 |
| C  | 2.32232600  | 9.96754300  | 22.63733800 |
| C  | 4.02631400  | 4.16493100  | 21.79094800 |
| C  | 3.39078800  | 3.26578500  | 22.70945800 |
| C  | 5.80342900  | 4.46802700  | 20.07248300 |
| H  | 6.53463700  | 3.96311500  | 19.43689000 |
| C  | 4.05379400  | 11.51683700 | 21.08220200 |
| H  | 4.73455800  | 12.10920100 | 20.47704800 |
| C  | 5.77557000  | 6.50871500  | 23.56507300 |
| C  | 6.69488000  | 7.79927800  | 19.48431100 |
| H  | 7.50334800  | 7.63539800  | 20.20400500 |
| H  | 7.02175700  | 8.52519000  | 18.73508400 |
| C  | 5.60184900  | 2.34257100  | 21.26438100 |
| H  | 6.45303100  | 1.99242400  | 20.68720300 |
| C  | 2.19695200  | 11.34153600 | 22.60531600 |
| H  | 1.42604600  | 11.83452500 | 23.18707700 |
| C  | 4.20369500  | 10.10745500 | 21.09898400 |
| C  | 4.99322700  | 1.51849700  | 22.18019100 |
| H  | 5.35476800  | 0.51028300  | 22.34881300 |
| C  | 5.27635300  | 9.53278000  | 20.33009400 |
| H  | 5.93499400  | 10.23263200 | 19.80999600 |
| C  | 1.60654000  | 2.96016600  | 24.27390600 |
| H  | 2.24165000  | 2.76087900  | 25.14656100 |
| H  | 1.32931900  | 2.00597700  | 23.80844000 |
| C  | 5.13639800  | 3.66387300  | 21.06529700 |
| C  | 3.87933700  | 1.98743100  | 22.90472900 |
| H  | 3.40908300  | 1.32589400  | 23.62303300 |
| C  | 0.49113400  | 9.67333500  | 24.15378700 |
| H  | -0.18968400 | 10.27425600 | 23.53703400 |
| H  | 0.91749200  | 10.30932700 | 24.94044000 |
| C  | 3.06864900  | 12.12668300 | 21.81998100 |
| H  | 2.95318400  | 13.20479300 | 21.80949600 |

|   |             |            |             |   |           |           |           |
|---|-------------|------------|-------------|---|-----------|-----------|-----------|
| C | -0.52104100 | 5.58428500 | 25.75144500 | H | 8.013443  | 5.483646  | 20.025126 |
| H | -1.12585300 | 4.98539600 | 26.44957600 | C | 3.199795  | 11.923723 | 21.113970 |
| H | -1.13712200 | 5.80009500 | 24.86646400 | H | 3.711234  | 12.683814 | 20.529433 |
| C | 6.29861000  | 6.47410800 | 18.84745700 | C | 6.222343  | 7.710351  | 23.989816 |
| H | 5.60391400  | 6.65240900 | 18.01991700 | C | 7.015921  | 9.197032  | 19.939782 |
| H | 7.16754500  | 5.92817600 | 18.47039300 | H | 7.773606  | 9.295461  | 20.723881 |
| C | -0.10625300 | 6.86149300 | 26.46048600 | H | 7.172409  | 9.977333  | 19.189618 |
| H | -1.00131800 | 7.31453300 | 26.91142500 | C | 7.408778  | 3.646197  | 21.787980 |
| H | 0.59688000  | 6.61930200 | 27.26219500 | H | 8.378730  | 3.561379  | 21.305532 |
| C | -0.28935000 | 8.52701900 | 24.75653100 | C | 1.352075  | 11.208700 | 22.482941 |
| H | -1.14372500 | 8.94643500 | 25.30753000 | H | 0.409996  | 11.446020 | 22.964604 |
| H | -0.66407300 | 7.87623700 | 23.95473400 | C | 3.791500  | 10.642094 | 21.234235 |
| C | 0.33440800  | 3.66490800 | 24.68193200 | C | 6.967117  | 2.662661  | 22.640474 |
| H | -0.26913100 | 3.87883300 | 23.78972400 | H | 7.581247  | 1.795171  | 22.855471 |
| H | -0.24004700 | 2.98441900 | 25.32812900 | C | 5.062085  | 10.421900 | 20.589318 |
| C | 7.12961500  | 6.35558100 | 24.23948700 | H | 5.512382  | 11.283875 | 20.090097 |
| H | 7.03014900  | 6.46132000 | 25.32043900 | C | 3.053710  | 3.010916  | 24.251566 |
| H | 7.84403500  | 7.08505400 | 23.85215000 | H | 3.577374  | 2.939620  | 25.213870 |
| H | 7.51862900  | 5.35664800 | 24.01660000 | H | 3.126011  | 2.045125  | 23.735213 |
| K | 2.08544800  | 6.47120000 | 23.64949800 | C | 6.612824  | 4.787342  | 21.526170 |
| O | -2.29792000 | 5.84465800 | 22.69545400 | C | 5.691344  | 2.775658  | 23.231631 |
| C | -1.20365000 | 5.62661600 | 22.14937900 | H | 5.348814  | 1.987840  | 23.893146 |
| O | -0.17636000 | 6.33453900 | 22.13541300 | C | 0.094192  | 9.115006  | 23.934961 |
| C | 1.82461100  | 6.94782400 | 19.61727600 | H | -0.643865 | 9.493793  | 23.216061 |
| C | 2.53831100  | 5.91140300 | 18.87177200 | H | 0.196386  | 9.836957  | 24.755665 |
| H | 1.47893700  | 6.73608900 | 20.62553400 | C | 2.002765  | 12.207598 | 21.726356 |
| H | 1.31068300  | 7.73646800 | 19.07469600 | H | 1.551399  | 13.189579 | 21.637162 |
| O | 3.26254700  | 7.02468400 | 19.46066700 | C | 0.096472  | 4.871412  | 25.405699 |
| H | 2.71954500  | 4.98398400 | 19.40921000 | H | -0.432984 | 4.100489  | 25.986617 |
| C | 2.57458300  | 5.84820900 | 17.37544600 | H | -0.386757 | 4.957695  | 24.422826 |
| H | 1.76905400  | 5.19594600 | 17.02544400 | C | 7.092394  | 7.803643  | 19.325978 |
| H | 2.43840900  | 6.84017400 | 16.93761600 | H | 6.447443  | 7.750941  | 18.443183 |
| H | 3.52371800  | 5.42915700 | 17.02991300 | H | 8.115731  | 7.543047  | 19.041126 |
| O | -1.14546600 | 4.39995900 | 21.49332600 | C | 0.020156  | 6.181499  | 26.170154 |
| C | 0.03717600  | 4.09882200 | 20.76731300 | H | -1.021730 | 6.342923  | 26.483360 |
| H | 0.08640700  | 4.68766500 | 19.84450100 | H | 0.641923  | 6.115615  | 27.067196 |
| H | 0.93423100  | 4.29112000 | 21.36206800 | C | -0.391497 | 7.778983  | 24.448405 |
| H | -0.02314100 | 3.03863700 | 20.51297500 | H | -1.400334 | 7.917891  | 24.863974 |

TS1Co.log

SCF (wB97xd) = -2884.62666366  
E(SCF)+ZPE(0 K)= -2883.981036  
H(298 K)= -2883.936047  
G(298 K)= -2884.057402  
Lowest Frequency = -540.1861cm-1

|    |          |          |           |
|----|----------|----------|-----------|
| Co | 5.107095 | 7.648819 | 21.283895 |
| O  | 4.549835 | 5.951128 | 21.950560 |
| O  | 3.635433 | 8.439261 | 22.190950 |
| O  | 3.630292 | 4.036744 | 23.459473 |
| O  | 6.336834 | 7.941780 | 22.730417 |
| O  | 1.347629 | 8.921530 | 23.301285 |
| O  | 0.490738 | 7.310237 | 25.454191 |
| O  | 1.452387 | 4.501455 | 25.232499 |
| O  | 5.224999 | 7.287645 | 24.577636 |
| N  | 5.701801 | 9.312820 | 20.564367 |
| N  | 6.564320 | 6.884434 | 20.326344 |
| C  | 3.161863 | 9.624933 | 21.994946 |
| C  | 1.905304 | 9.950933 | 22.610442 |
| C  | 5.340688 | 4.940649 | 22.133385 |
| C  | 4.887051 | 3.867745 | 22.971416 |
| C  | 7.109196 | 5.753577 | 20.576377 |

|   |           |           |           |
|---|-----------|-----------|-----------|
| H | 8.013443  | 5.483646  | 20.025126 |
| C | 3.199795  | 11.923723 | 21.113970 |
| H | 3.711234  | 12.683814 | 20.529433 |
| C | 6.222343  | 7.710351  | 23.989816 |
| C | 7.015921  | 9.197032  | 19.939782 |
| H | 7.773606  | 9.295461  | 20.723881 |
| H | 7.172409  | 9.977333  | 19.189618 |
| C | 7.408778  | 3.646197  | 21.787980 |
| H | 8.378730  | 3.561379  | 21.305532 |
| C | 1.352075  | 11.208700 | 22.482941 |
| H | 0.409996  | 11.446020 | 22.964604 |
| C | 3.791500  | 10.642094 | 21.234235 |
| C | 6.967117  | 2.662661  | 22.640474 |
| H | 7.581247  | 1.795171  | 22.855471 |
| C | 5.062085  | 10.421900 | 20.589318 |
| H | 5.512382  | 11.283875 | 20.090097 |
| C | 3.053710  | 3.010916  | 24.251566 |
| H | 3.577374  | 2.939620  | 25.213870 |
| H | 3.126011  | 2.045125  | 23.735213 |
| C | 6.612824  | 4.787342  | 21.526170 |
| C | 5.691344  | 2.775658  | 23.231631 |
| H | 5.348814  | 1.987840  | 23.893146 |
| C | 0.094192  | 9.115006  | 23.934961 |
| H | -0.643865 | 9.493793  | 23.216061 |
| H | 0.196386  | 9.836957  | 24.755665 |
| C | 2.002765  | 12.207598 | 21.726356 |
| H | 1.551399  | 13.189579 | 21.637162 |
| C | 0.096472  | 4.871412  | 25.405699 |
| H | -0.432984 | 4.100489  | 25.986617 |
| H | -0.386757 | 4.957695  | 24.422826 |
| C | 7.092394  | 7.803643  | 19.325978 |
| H | 6.447443  | 7.750941  | 18.443183 |
| H | 8.115731  | 7.543047  | 19.041126 |
| C | 0.020156  | 6.181499  | 26.170154 |
| H | -1.021730 | 6.342923  | 26.483360 |
| H | 0.641923  | 6.115615  | 27.067196 |
| C | -0.391497 | 7.778983  | 24.448405 |
| H | -1.400334 | 7.917891  | 24.863974 |
| H | -0.442375 | 7.066374  | 23.614844 |
| C | 1.591297  | 3.329037  | 24.453380 |
| H | 1.104086  | 3.471496  | 23.479543 |
| H | 1.121441  | 2.475368  | 24.964977 |
| C | 7.506404  | 7.984640  | 24.760922 |
| H | 7.304318  | 8.056244  | 25.830639 |
| H | 7.987550  | 8.898805  | 24.405972 |
| H | 8.200551  | 7.155203  | 24.588979 |
| K | 2.719009  | 6.582939  | 23.862284 |
| O | 0.680721  | 5.610791  | 22.149908 |
| C | 0.510941  | 5.008390  | 21.083175 |
| O | 0.925268  | 5.323595  | 19.931458 |
| C | 2.373595  | 6.757183  | 19.954165 |
| C | 3.539201  | 6.221445  | 19.264247 |
| H | 2.348050  | 6.737427  | 21.030637 |
| H | 1.739003  | 7.454677  | 19.424291 |
| O | 4.020969  | 7.487594  | 19.693224 |
| H | 4.019888  | 5.382472  | 19.769268 |
| C | 3.515767  | 6.065220  | 17.764039 |
| H | 2.967708  | 5.158269  | 17.491506 |
| H | 3.032840  | 6.925437  | 17.290887 |
| H | 4.537649  | 5.980452  | 17.382162 |
| O | -0.219772 | 3.853606  | 21.178319 |
| C | -0.414923 | 3.090312  | 19.993452 |
| H | 0.540445  | 2.765553  | 19.571924 |

H -1.000600 2.220762 20.294231  
H -0.962560 3.662458 19.239594

TS1Co'.log

SCF (wB97xd) = -2884.62384888  
E(SCF)+ZPE(0 K)= -2883.978357  
H(298 K)= -2883.933132  
G(298 K)= -2884.056148  
Lowest Frequency = -538.6671cm-1

Co 5.021703 7.624193 21.360221  
O 4.400384 5.967411 22.050959  
O 3.654041 8.472463 22.367768  
O 3.372580 4.050316 23.458502  
O 6.381785 7.825068 22.710571  
O 1.300702 8.923563 23.344255  
O 0.388335 7.367520 25.478827  
O 1.219378 4.603399 25.174111  
O 5.442588 7.185011 24.654060  
N 5.659164 9.267391 20.634286  
N 6.367062 6.799989 20.293202  
C 3.149085 9.631034 22.091713  
C 1.866187 9.947375 22.647898  
C 5.079056 4.866121 22.076995  
C 4.570466 3.786115 22.870597  
C 6.811204 5.608089 20.440134  
H 7.654983 5.293139 19.820960  
C 3.162922 11.890941 21.118044  
H 3.672206 12.637530 20.514625  
C 6.393943 7.567469 23.967248  
C 6.953279 9.099226 19.983764  
H 7.726282 9.119052 20.758066  
H 7.145182 9.896075 19.259745  
C 6.951441 3.388655 21.466173  
H 7.865705 3.237326 20.898751  
C 1.291295 11.188621 22.460907  
H 0.328130 11.421924 22.900728  
C 3.772472 10.625989 21.297331  
C 6.469157 2.396255 22.285422  
H 6.996145 1.454169 22.388061  
C 5.043741 10.389408 20.656775  
H 5.504977 11.239876 20.148049  
C 2.737041 3.029521 24.208180  
H 3.248374 2.896225 25.170139  
H 2.758438 2.077290 23.664190  
C 6.274189 4.627238 21.352168  
C 5.264869 2.600056 22.991868  
H 4.889133 1.804838 23.625783  
C 0.010784 9.111902 23.898919  
H -0.694068 9.449568 23.128278  
H 0.050043 9.859972 24.701093  
C 1.945957 12.174159 21.691965  
H 1.479434 13.143657 21.556616  
C -0.106499 4.955051 25.512433  
H -0.547208 4.194946 26.174834  
H -0.727936 5.004362 24.606301  
C 6.928962 7.727368 19.317412  
H 6.263633 7.750851 18.448053  
H 7.927003 7.415840 18.996616  
C -0.097194 6.282454 26.247516  
H -1.115828 6.493897 26.603853  
H 0.565095 6.214261 27.114282  
C -0.467508 7.783424 24.433217

H -1.495697 7.905837 24.802789  
H -0.480517 7.047851 23.616926  
C 1.292954 3.418055 24.408191  
H 0.808112 3.561487 23.430720  
H 0.784828 2.593293 24.929154  
C 7.766314 7.749944 24.600626  
H 8.381370 6.877454 24.355962  
H 7.682533 7.825074 25.685786  
H 8.267681 8.632988 24.198399  
K 2.880495 6.707952 24.221554  
O 0.691568 5.344133 20.090540  
C 2.234258 6.692878 20.155483  
C 3.372719 6.324255 19.322579  
H 2.310886 6.512207 21.214595  
H 1.534669 7.427498 19.783728  
O 3.810033 7.561288 19.866499  
H 3.933201 5.464815 19.687422  
C 3.237466 6.336581 17.820985  
H 2.727132 5.427754 17.488986  
H 2.664485 7.207082 17.487778  
H 4.227777 6.367416 17.356463  
O 0.089043 3.304837 20.797985  
C 0.903274 4.126851 20.367104  
O 2.197809 3.739065 20.136692  
C 2.540102 2.395164 20.430955  
H 3.623177 2.329345 20.315227  
H 2.264104 2.131972 21.455107  
H 2.046573 1.701967 19.742512

IICo.log

SCF (wB97xd) = -2884.018926  
E(SCF)+ZPE(0 K)= -2883.974684  
H(298 K)= -2883.973739  
G(298 K)= -2884.096972  
Lowest Frequency = 19.7337cm-1

Co 5.49941700 7.85456500 21.08455800  
O 4.75412800 6.14178200 21.44838200  
O 3.89507900 8.60367800 21.78185300  
O 3.40202600 4.10343100 22.27685800  
O 6.45445500 7.91442400 22.81089300  
O 1.37414200 8.95598800 22.19295400  
O 0.08480100 7.26230800 24.01327900  
O 0.96006600 4.52300800 23.58946600  
O 5.08593600 7.10552300 24.40209600  
N 6.26920100 9.56429800 20.73810900  
N 7.11506900 7.13464800 20.38089100  
C 3.44638600 9.77486800 21.47929500  
C 2.05738700 10.03640700 21.72195400  
C 5.41335700 5.03492500 21.51660800  
C 4.71657700 3.87595100 21.99813000  
C 7.51904100 5.92804200 20.50774500  
H 8.50513000 5.66816100 20.11299600  
C 3.63861700 12.10365800 20.71491500  
H 4.26071500 12.90304800 20.32072500  
C 6.17347800 7.53992600 23.99782000  
C 7.69585300 9.45967200 20.46093300  
H 8.22199700 9.40921500 21.41938200  
H 8.06117700 10.32055400 19.89288700  
C 7.39379800 3.59718800 21.26122100  
H 8.43048900 3.49252400 20.95198100  
C 1.50740200 11.27911700 21.48123700

|   |             |             |             |
|---|-------------|-------------|-------------|
| H | 0.45769000  | 11.46623100 | 21.67947800 |
| C | 4.22413500  | 10.83770100 | 20.95319500 |
| C | 6.71401200  | 2.52091600  | 21.78128800 |
| H | 7.20220100  | 1.56012800  | 21.90209100 |
| C | 5.63234900  | 10.67119000 | 20.67001800 |
| H | 6.18408400  | 11.56850500 | 20.37603900 |
| C | 2.60093600  | 3.01767900  | 22.70530100 |
| H | 2.90043700  | 2.70307800  | 23.71357300 |
| H | 2.70772300  | 2.16617800  | 22.02119600 |
| C | 6.76387500  | 4.85711800  | 21.11927400 |
| C | 5.35799600  | 2.66350600  | 22.14715500 |
| H | 4.82814700  | 1.80400500  | 22.54265200 |
| C | -0.00423500 | 9.09244900  | 22.48093800 |
| H | -0.54835300 | 9.46177200  | 21.60154800 |
| H | -0.15152000 | 9.79436600  | 23.31198900 |
| C | 2.30534300  | 12.32672800 | 20.97266600 |
| H | 1.85896600  | 13.29796200 | 20.78937300 |
| C | -0.40227100 | 4.85877600  | 23.75162500 |
| H | -0.93872300 | 4.04806700  | 24.26659100 |
| H | -0.87798600 | 4.99414000  | 22.76902800 |
| C | 7.89965500  | 8.15415400  | 19.69559900 |
| H | 7.49919700  | 8.25696900  | 18.68247100 |
| H | 8.95762600  | 7.88030400  | 19.64266500 |
| C | -0.51669900 | 6.11831000  | 24.59128300 |
| H | -1.58191700 | 6.30763100  | 24.78921500 |
| H | -0.00829400 | 5.96927700  | 25.54709600 |
| C | -0.53947500 | 7.72499000  | 22.83267900 |
| H | -1.62777300 | 7.79634600  | 22.97234300 |
| H | -0.34042100 | 7.04234300  | 21.99589300 |
| C | 1.15504700  | 3.45202700  | 22.68827700 |
| H | 0.86497400  | 3.75621000  | 21.67187400 |
| H | 0.53727000  | 2.58945400  | 22.97752500 |
| C | 7.34770500  | 7.63707700  | 24.96565100 |
| H | 7.00184000  | 7.61515300  | 26.00048100 |
| H | 7.93037300  | 8.54279200  | 24.78215200 |
| H | 8.00759100  | 6.77859400  | 24.79989500 |
| K | 2.77184600  | 6.67790000  | 23.22868200 |
| O | 0.42229800  | 4.19891900  | 18.88765000 |
| C | 0.88353500  | 5.30140600  | 19.07783500 |
| O | 2.16673500  | 5.55728400  | 18.92593900 |
| C | 2.72240700  | 6.86206300  | 19.22919300 |
| C | 4.18090900  | 6.87394100  | 18.76279600 |
| H | 2.67938300  | 7.02512900  | 20.30525400 |
| H | 2.14096300  | 7.63414700  | 18.71601300 |
| O | 4.82947100  | 7.96233600  | 19.32603300 |
| H | 4.62880300  | 5.91669900  | 19.07607200 |
| C | 4.27366800  | 6.95910200  | 17.23937300 |
| H | 3.71748700  | 6.14369800  | 16.76369700 |
| H | 3.86223600  | 7.91316800  | 16.88940100 |
| H | 5.31924700  | 6.89671700  | 16.92256400 |
| O | 0.17038600  | 6.36500300  | 19.44734700 |
| C | -1.24448300 | 6.16867300  | 19.55232900 |
| H | -1.47016500 | 5.41720500  | 20.31220900 |
| H | -1.65120000 | 7.13683900  | 19.83896900 |
| H | -1.65582300 | 5.85441800  | 18.59139000 |

TS4Co.log

SCF (wB97xd) = -2884.632287  
 E(SCF)+ZPE(0 K)= -2883.984878  
 H(298 K)= -2883.940898  
 G(298 K)= -2884.060373  
 Lowest Frequency = -147.0039cm-1

|   |           |           |           |
|---|-----------|-----------|-----------|
| K | 5.176666  | 7.777764  | 21.879327 |
| O | 2.891304  | 8.661219  | 23.031747 |
| O | 3.183259  | 6.097903  | 22.396686 |
| O | 4.577800  | 10.454539 | 22.228662 |
| O | 3.133789  | 6.794124  | 25.089909 |
| O | 4.892761  | 5.294110  | 20.630953 |
| O | 7.153917  | 6.867534  | 20.041872 |
| O | 6.682194  | 9.719115  | 20.512079 |
| O | 5.239416  | 7.293320  | 24.462009 |
| N | 1.114939  | 5.472873  | 24.145734 |
| N | 0.851414  | 7.968128  | 24.739509 |
| C | 3.235316  | 4.821199  | 22.220593 |
| C | 4.178121  | 4.320286  | 21.259825 |
| C | 2.954703  | 9.729768  | 23.757333 |
| C | 3.891981  | 10.744714 | 23.370360 |
| C | 1.064497  | 9.115747  | 25.254900 |
| H | 0.358286  | 9.482320  | 26.003669 |
| C | 2.576299  | 2.482864  | 22.622575 |
| H | 1.944238  | 1.776782  | 23.154500 |
| C | 4.388502  | 6.968874  | 25.294224 |
| C | 0.150989  | 5.739182  | 25.216557 |
| H | 0.670366  | 5.629968  | 26.174471 |
| H | -0.681789 | 5.031158  | 25.180702 |
| C | 2.313531  | 11.195196 | 25.626250 |
| H | 1.675408  | 11.372684 | 26.487949 |
| C | 4.309107  | 2.967865  | 21.022543 |
| H | 5.032819  | 2.603033  | 20.302202 |
| C | 2.423156  | 3.866905  | 22.884322 |
| C | 3.260871  | 12.123576 | 25.260802 |
| H | 3.397024  | 13.034955 | 25.832587 |
| C | 1.417325  | 4.266214  | 23.835696 |
| H | 0.866603  | 3.459762  | 24.327099 |
| C | 5.492610  | 11.406129 | 21.716044 |
| H | 6.343593  | 11.521708 | 22.399888 |
| H | 5.003527  | 12.380494 | 21.588951 |
| C | 2.146372  | 9.999195  | 24.889821 |
| C | 4.051279  | 11.896291 | 24.114272 |
| H | 4.783473  | 12.641765 | 23.824014 |
| C | 5.844208  | 4.914352  | 19.651895 |
| H | 5.362304  | 4.331743  | 18.856151 |
| H | 6.636450  | 4.308478  | 20.109950 |
| C | 3.503847  | 2.035720  | 21.712930 |
| H | 3.623258  | 0.976359  | 21.514778 |
| C | 7.180828  | 9.212691  | 19.289575 |
| H | 7.863659  | 9.939909  | 18.825462 |
| H | 6.352479  | 9.035813  | 18.587113 |
| C | -0.325391 | 7.173675  | 25.048118 |
| H | -1.004509 | 7.256730  | 24.193679 |
| H | -0.831168 | 7.538192  | 25.947225 |
| C | 7.953159  | 7.934682  | 19.562741 |
| H | 8.479325  | 7.634473  | 18.645812 |
| H | 8.697512  | 8.125219  | 20.340337 |
| C | 6.429945  | 6.169060  | 19.047517 |
| H | 7.096201  | 5.876807  | 18.223524 |
| H | 5.623589  | 6.790231  | 18.632883 |
| C | 5.960637  | 10.924575 | 20.362772 |
| H | 5.094516  | 10.769995 | 19.702608 |
| H | 6.599355  | 11.701139 | 19.917521 |
| C | 4.786069  | 6.762449  | 26.749206 |
| H | 4.498160  | 7.653338  | 27.317420 |
| H | 5.864708  | 6.624625  | 26.837062 |
| H | 4.259510  | 5.908676  | 27.181222 |

Co 2.012070 7.062852 23.549245  
O 0.778586 7.352669 22.047184  
C 0.382208 6.318597 21.176706  
C -0.452451 8.611440 21.850969  
H 0.437275 5.361128 21.702749  
C -1.109127 6.627149 20.850145  
C 1.217827 6.242815 19.902104  
O -1.495942 7.701728 21.680450  
O -0.537996 9.399632 22.781867  
O 0.036117 9.054533 20.608195  
H -1.770700 5.789040 21.077976  
H -1.225019 6.899667 19.793748  
H 2.267922 6.057810 20.131952  
H 0.849023 5.427871 19.267377  
H 1.134274 7.183133 19.350952  
C -0.782479 10.059501 20.032765  
H -0.312938 10.339681 19.088472  
H -0.846371 10.938842 20.683406  
H -1.793663 9.681719 19.833578

XCo.log

SCF (wB97xd) = -2884.016320  
E(SCF)+ZPE(0 K)= -2883.971733  
H(298 K)= -2883.970788  
G(298 K)= -2884.096295  
Lowest Frequency = 14.9555cm-1

K 5.30943800 7.57006400 21.97551700  
O 2.81738300 8.40748800 22.65492300  
O 3.41083100 5.81350800 22.44418300  
O 4.46571700 10.23133800 21.83303200  
O 2.99100700 6.88297400 25.03234100  
O 5.16281300 5.03134900 20.71583900  
O 7.45369900 6.59944900 20.36321900  
O 6.84853500 9.45441600 20.54678300  
O 5.09636500 7.54937600 24.60644900  
N 1.19543200 5.21701100 23.99688500  
N 0.64174300 7.74069700 24.21149000  
C 3.36994400 4.55862500 22.14817300  
C 4.34378300 4.06422500 21.21639200  
C 2.70198000 9.55934700 23.22655500  
C 3.60454900 10.60130900 22.82370700  
C 0.69621200 8.96264700 24.58540200  
H -0.10998100 9.35083700 25.21362000  
C 2.53096000 2.25309200 22.32266200  
H 1.82023100 1.55493200 22.75718300  
C 4.16397500 7.25595500 25.36828200  
C 0.17897800 5.53220200 24.99453800  
H 0.67975300 5.65773000 25.95995800  
H -0.56618700 4.73532500 25.07614000  
C 1.70308100 11.18779200 24.77946000  
H 0.94265900 11.41220200 25.52293700  
C 4.40407000 2.72641900 20.88316100  
H 5.15372300 2.36372700 20.18850400  
C 2.45092400 3.61981700 22.68226800  
C 2.61448700 12.14772600 24.40628900  
H 2.59964800 13.13466100 24.85552700  
C 1.43477300 4.01529100 23.63135600  
H 0.83365800 3.21222700 24.06712000  
C 5.39994800 11.18046500 21.35307300  
H 6.12200300 11.43261700 22.14082800  
H 4.88859700 12.09787500 21.03400300

C 1.73204200 9.89480700 24.20622300  
C 3.57129200 11.84893000 23.41236700  
H 4.27838000 12.61633300 23.11719900  
C 6.17985900 4.65931700 19.80409600  
H 5.75387900 4.11791900 18.94940600  
H 6.91694500 4.01631100 20.30231400  
C 3.48909200 1.80794200 21.44175700  
H 3.55031000 0.75991700 21.16977100  
C 7.60681800 8.90088500 19.48999700  
H 8.36577700 9.61993000 19.14702900  
H 6.95369900 8.67461000 18.63410100  
C -0.45438000 6.85530100 24.57448900  
H -1.06931300 6.69994500 23.68169400  
H -1.07404500 7.28047600 25.37000400  
C 8.31892800 7.65421400 19.98366200  
H 9.01337300 7.31391200 19.20209900  
H 8.89845300 7.89914400 20.87743900  
C 6.83451300 5.91996500 19.28886400  
H 7.57989600 5.63989300 18.53077200  
H 6.07566400 6.55224000 18.80703700  
C 6.10483000 10.58977700 20.15509400  
H 5.36820100 10.31289600 19.38654700  
H 6.77014700 11.35722600 19.73336800  
C 4.36732000 7.35901500 26.87563900  
H 3.91979100 8.29714300 27.22181600  
H 5.42932000 7.36704700 27.12668300  
H 3.86336500 6.54047200 27.39473500  
Co 2.02908800 6.79450400 23.30678700  
O 0.90520100 6.66582200 21.81036200  
C -2.28234600 9.49256300 23.22553800  
C -2.26191600 8.53364900 21.16146600  
O -2.82462700 8.51005900 22.50205800  
O -2.64727200 9.80437300 24.32678200  
O -1.27397700 10.07801200 22.57497700  
H -2.95353800 9.12078600 20.54853200  
C -0.95583300 9.29043700 21.40667600  
H -0.68432200 9.96869300 20.59989000  
H -0.13507100 8.60693400 21.65999700  
C 1.48021400 6.79766300 20.55171100  
H 2.00583000 5.88620000 20.21707400  
H 0.68317500 6.99996100 19.81695600  
H 2.19828300 7.63129000 20.49699200  
C -2.11462400 7.12743600 20.63363400  
H -3.07826200 6.61263000 20.65093900  
H -1.77278600 7.17167400 19.59532600  
H -1.37191500 6.57702000 21.21902000

VIII Co.log

SCF (wB97xd) = -2502.952251  
E(SCF)+ZPE(0 K)= -2502.410639  
H(298 K)= -2502.373030  
G(298 K)= -2502.479331  
Lowest Frequency = 21.2944cm-1

Co 2.442096 6.344059 23.058946  
K 5.713810 7.524402 21.987066  
O 1.439444 6.130359 21.487682  
O 3.109829 8.057529 22.550080  
O 3.958439 5.570854 22.194189  
O 4.593448 10.086047 21.911253  
O 3.322306 6.407161 24.832223  
O 5.918727 5.064504 20.584320

O 8.060045 6.874051 20.512321  
O 7.134486 9.636346 20.776493  
O 5.376540 7.289614 24.586442  
N 1.756166 4.646847 23.607653  
N 0.927786 7.082343 23.941862  
C 4.096120 4.332905 21.866375  
C 5.187910 3.989859 20.996794  
C 2.815541 9.167805 23.137020  
C 3.619196 10.320280 22.835617  
C 0.803676 8.294127 24.331972  
H -0.082900 8.563038 24.912740  
C 3.541957 1.935107 21.923302  
H 2.895863 1.141203 22.289032  
C 4.437396 6.849568 25.265036  
C 0.661157 4.787428 24.560812  
H 1.096014 4.887323 25.560665  
H -0.001756 3.917117 24.544151  
C 1.514119 10.618990 24.644046  
H 0.680498 10.729510 25.332804  
C 5.435207 2.681960 20.634816  
H 6.270190 2.436764 19.987753  
C 3.270115 3.268830 22.313531  
C 2.333096 11.688513 24.369540  
H 2.169178 12.651231 24.841067  
C 2.156319 3.500884 23.203734  
H 1.625135 2.614025 23.560966  
C 5.443069 11.153528 21.532295  
H 6.072861 11.454333 22.379772  
H 4.852537 12.018756 21.204517  
C 1.738016 9.356932 24.042679  
C 3.394008 11.534519 23.450803  
H 4.027855 12.387362 23.234611  
C 7.052938 4.842366 19.766779  
H 6.773081 4.295386 18.856941  
H 7.805531 4.260790 20.315048  
C 4.604195 1.639786 21.101535  
H 4.812679 0.617021 20.807212  
C 8.026190 9.222097 19.760537  
H 8.724858 10.034803 19.511676  
H 7.467795 8.972904 18.846042  
C -0.084544 6.068395 24.200722  
H -0.651237 5.919675 23.275887  
H -0.767616 6.374186 24.998949  
C 8.831180 8.033265 20.254018  
H 9.617152 7.811590 19.517855  
H 9.309816 8.289496 21.202729  
C 7.613286 6.185505 19.360705  
H 8.448657 6.017392 18.665949  
H 6.838065 6.758839 18.833548  
C 6.294294 10.697150 20.371316  
H 5.650507 10.373403 19.540303  
H 6.894625 11.552379 20.028278  
C 4.556277 6.828854 26.785278  
H 3.941241 7.636556 27.196335  
H 5.590429 6.980634 27.098580  
H 4.176452 5.887434 27.189741  
C 0.886826 7.252948 20.884644  
H 1.639251 7.994897 20.570199  
H 0.336656 6.934503 19.984960  
H 0.163533 7.784366 21.532032

R-propylene carbonate.log

SCF (wB97xd) = -381.695422  
E(SCF)+ZPE(0 K)= -381.591328  
H(298 K)= -381.584209  
G(298 K)= -381.621660  
Lowest Frequency = 95.5474cm-1

C 0.07010100 0.62658600 -0.12389400  
O 0.72105600 1.62537100 -0.24635600  
O -1.23059000 0.60348000 0.17912000  
O 0.55784500 -0.61147700 -0.27544300  
C -1.73767900 -0.74983300 0.08129400  
H -2.23533700 -0.82796400 -0.88962400  
C -0.44200000 -1.56962900 0.10368100  
H -0.43334100 -2.38596300 -0.61633600  
H -0.20241900 -1.94213700 1.10363400  
C -2.69817500 -1.03375800 1.21120100  
H -3.56736700 -0.37528800 1.15219400  
H -3.04591200 -2.06817300 1.13742800  
H -2.20746500 -0.89625200 2.17862700

III Co.log

SCF (wB97xd) = -2884.65290204  
E(SCF)+ZPE(0 K)= -2884.005598  
H(298 K)= -2883.960032  
G(298 K)= -2884.086810  
Lowest Frequency = 11.4567cm-1

Co 5.473090 8.263367 21.262831  
O 4.886063 6.449231 21.389312  
O 3.932158 8.770760 22.270229  
O 3.767470 4.192118 21.979650  
O 6.599140 8.114898 22.871037  
O 1.432577 8.844435 22.945681  
O 0.507430 6.781733 24.580430  
O 1.502809 4.198770 23.658081  
O 5.474469 6.907346 24.400799  
N 6.096355 10.056529 21.152730  
N 7.082133 7.811027 20.329325  
C 3.364984 9.924035 22.175881  
C 1.991523 10.032284 22.580176  
C 5.614712 5.407678 21.195352  
C 5.053404 4.126352 21.531906  
C 7.574017 6.630446 20.236609  
H 8.568214 6.523520 19.794263  
C 3.309769 12.346995 21.738406  
H 3.831641 13.242037 21.409910  
C 6.472825 7.513653 23.990766  
C 7.520462 10.122058 20.842204  
H 8.068663 9.971390 21.776597  
H 7.793503 11.091749 20.415054  
C 7.654965 4.201746 20.519543  
H 8.662106 4.239581 20.112698  
C 1.335466 11.246109 22.572826  
H 0.301677 11.316529 22.892764  
C 4.003590 11.113176 21.737374  
C 7.102941 2.999916 20.890329  
H 7.661811 2.075938 20.791235  
C 5.388512 11.108784 21.335648  
H 5.862870 12.082243 21.185087  
C 3.117161 2.992041 22.356114

H 3.581102 2.580872 23.262279  
H 3.186050 2.246690 21.553422  
C 6.931759 5.412722 20.662413  
C 5.785362 2.965749 21.400464  
H 5.360163 2.010188 21.686609  
C 0.103327 8.836623 23.432566  
H -0.578159 9.305012 22.710626  
H 0.047569 9.383989 24.382492  
C 1.998817 12.418215 22.147261  
H 1.466994 13.363347 22.148729  
C 0.148870 4.409270 24.006702  
H -0.279907 3.494912 24.443262  
H -0.438398 4.653008 23.109288  
C 7.834059 8.979294 19.878636  
H 7.510178 9.240127 18.865637  
H 8.907866 8.773561 19.850008  
C 0.057335 5.519716 25.038035  
H -0.984642 5.589108 25.382863  
H 0.689096 5.274447 25.895546  
C -0.321671 7.398100 23.615247  
H -1.371064 7.383604 23.942989  
H -0.255706 6.877402 22.649849  
C 1.654734 3.288398 22.588369  
H 1.208455 3.705358 21.673579  
H 1.147398 2.339746 22.816653  
C 7.728754 7.566631 24.853606  
H 7.506053 7.282921 25.883482  
H 8.175901 8.563252 24.826615  
H 8.463272 6.863684 24.446235  
K 3.066730 6.537746 23.383357  
O 6.379530 6.995014 15.362414  
C 6.228508 8.193353 15.393162  
O 5.681028 8.879362 16.383129  
C 5.220364 8.137010 17.533183  
C 4.699293 9.128167 18.576903  
H 6.052540 7.555981 17.937084  
H 4.426392 7.451252 17.219781  
O 4.392837 8.426079 19.727464  
H 5.486892 9.884570 18.733037  
C 3.459789 9.872176 18.075870  
H 3.660492 10.407299 17.141369  
H 2.641785 9.162326 17.905635  
H 3.140128 10.593157 18.834491  
O 6.619727 8.965543 14.384232  
C 6.424248 10.386148 14.451234  
H 6.974791 10.809859 15.293104  
H 6.817549 10.770247 13.511845  
H 5.362889 10.623918 14.542391

IVCo.log

SCF (wB97xd) = -3073.24143897  
E(SCF)+ZPE(0 K)= -3072.580942  
H(298 K)= -3072.531563  
G(298 K)= -3072.665935  
Lowest Frequency = 13.3691cm<sup>-1</sup>

Co 5.413397 7.959583 21.058208  
O 4.869096 6.154063 21.331135  
O 3.735179 8.482488 21.809280  
O 3.804392 3.963216 22.211099  
O 6.404113 8.036875 22.764424  
O 1.274061 8.675608 22.666908

O 0.550428 6.778809 24.629137  
O 1.539812 4.117004 23.877662  
O 5.249572 6.943870 24.354140  
N 5.998440 9.753879 20.797458  
N 7.078709 7.450894 20.288408  
C 3.211217 9.659330 21.741625  
C 1.864543 9.825823 22.211905  
C 5.659214 5.134860 21.380565  
C 5.122925 3.896458 21.871675  
C 7.622366 6.296410 20.362539  
H 8.619595 6.165316 19.933592  
C 3.214360 12.073043 21.253950  
H 3.751863 12.944565 20.889451  
C 6.247783 7.542764 23.930021  
C 7.411602 9.816831 20.443894  
H 7.990841 9.789639 21.372354  
H 7.650125 10.734380 19.897679  
C 7.791834 3.949582 21.055452  
H 8.825535 3.976165 20.720676  
C 1.244760 11.058900 22.190206  
H 0.229534 11.172148 22.552848  
C 3.876053 10.823297 21.270071  
C 7.257895 2.789873 21.566410  
H 7.858606 1.891038 21.651797  
C 5.262876 10.797115 20.861444  
H 5.712852 11.761457 20.609385  
C 3.172861 2.804636 22.725689  
H 3.627223 2.520683 23.683950  
H 3.272596 1.967171 22.023136  
C 7.013272 5.127578 20.956612  
C 5.906731 2.765539 21.974351  
H 5.494014 1.842988 22.367294  
C 0.085392 8.804207 23.433029  
H -0.707180 9.283154 22.844435  
H 0.286431 9.415038 24.322115  
C 1.919163 12.195786 21.700408  
H 1.414190 13.155298 21.689994  
C 0.185518 4.383838 24.184860  
H -0.280799 3.501873 24.648484  
H -0.372620 4.611935 23.264718  
C 7.715723 8.573490 19.613384  
H 7.256040 8.669901 18.624973  
H 8.792693 8.417637 19.499894  
C 0.120435 5.539238 25.168403  
H -0.906523 5.626070 25.549422  
H 0.784351 5.331360 26.011538  
C -0.411172 7.432638 23.828595  
H -1.348951 7.565347 24.387119  
H -0.641040 6.841138 22.932346  
C 1.703002 3.104102 22.905730  
H 1.264340 3.424014 21.949509  
H 1.199606 2.180449 23.225837  
C 7.458750 7.718000 24.839109  
H 7.183066 7.580843 25.886065  
H 7.916243 8.699434 24.694711  
H 8.204886 6.961438 24.572774  
K 2.947191 6.416733 23.216438  
O 0.685222 8.848049 16.535150  
C 0.742911 7.690635 16.873866  
O 1.673819 7.155733 17.649320  
C 2.745626 8.018782 18.092084  
C 3.723125 7.192130 18.925374  
H 2.324350 8.830153 18.692072

|   |           |          |           |
|---|-----------|----------|-----------|
| H | 3.243828  | 8.440223 | 17.213165 |
| O | 4.706896  | 8.083295 | 19.323877 |
| H | 3.173764  | 6.789991 | 19.789334 |
| C | 4.292275  | 6.014523 | 18.130341 |
| H | 3.507705  | 5.314314 | 17.822879 |
| H | 4.806094  | 6.379517 | 17.232479 |
| H | 5.016727  | 5.476474 | 18.747514 |
| O | -0.170700 | 6.807771 | 16.482014 |
| C | -0.035192 | 5.425228 | 16.842585 |
| H | -0.084893 | 5.299756 | 17.925529 |
| H | -0.878425 | 4.925512 | 16.369579 |
| H | 0.905565  | 5.020505 | 16.465272 |
| C | 0.429394  | 7.090009 | 20.444382 |
| O | -0.052182 | 8.046948 | 20.006571 |
| O | 0.887716  | 6.114805 | 20.873832 |

TS2Co.log

SCF (wB97xd) = -3073.22996851  
 E(SCF)+ZPE(0 K)= -3072.568999  
 H(298 K)= -3072.520856  
 G(298 K)= -3072.652366  
 Lowest Frequency = -219.3148cm-1

|    |          |           |           |
|----|----------|-----------|-----------|
| Co | 5.378902 | 7.360410  | 21.246756 |
| O  | 4.760552 | 5.779841  | 22.096664 |
| O  | 3.944270 | 8.346398  | 22.024222 |
| O  | 3.582400 | 3.988875  | 23.539387 |
| O  | 6.576425 | 7.805142  | 22.688671 |
| O  | 1.499043 | 8.853481  | 22.768837 |
| O  | 0.523334 | 7.552449  | 25.025248 |
| O  | 1.367802 | 4.747970  | 25.105490 |
| O  | 5.401108 | 7.377791  | 24.563476 |
| N  | 6.036717 | 8.912380  | 20.359386 |
| N  | 6.902205 | 6.480339  | 20.477551 |
| C  | 3.382450 | 9.362594  | 21.464037 |
| C  | 2.047586 | 9.710406  | 21.866683 |
| C  | 5.433078 | 4.696746  | 22.287852 |
| C  | 4.836288 | 3.680776  | 23.108596 |
| C  | 7.354918 | 5.334253  | 20.833818 |
| H  | 8.310871 | 5.009972  | 20.414656 |
| C  | 3.335790 | 11.345283 | 19.996786 |
| H  | 3.848129 | 11.974745 | 19.273975 |
| C  | 6.419586 | 7.724910  | 23.961594 |
| C  | 7.442661 | 8.774890  | 19.995826 |
| H  | 8.038579 | 8.977219  | 20.890268 |
| H  | 7.722837 | 9.479571  | 19.207306 |
| C  | 7.373649 | 3.203032  | 22.039624 |
| H  | 8.353085 | 3.019908  | 21.605930 |
| C  | 1.416951 | 10.826764 | 21.356265 |
| H  | 0.415907 | 11.088575 | 21.680574 |
| C  | 4.005551 | 10.207516 | 20.508974 |
| C  | 6.795889 | 2.272140  | 22.868336 |
| H  | 7.309164 | 1.348072  | 23.110126 |
| C  | 5.363804 | 9.972192  | 20.096684 |
| H  | 5.853886 | 10.763124 | 19.523357 |
| C  | 2.883904 | 3.052406  | 24.340038 |
| H  | 3.351252 | 2.981685  | 25.330738 |
| H  | 2.893884 | 2.060435  | 23.870821 |
| C  | 6.708311 | 4.417148  | 21.736014 |
| C  | 5.511405 | 2.515028  | 23.404064 |
| H  | 5.064251 | 1.768358  | 24.050833 |
| C  | 0.173338 | 9.075361  | 23.213172 |

|   |           |           |           |
|---|-----------|-----------|-----------|
| H | -0.496273 | 9.259070  | 22.363421 |
| H | 0.142472  | 9.942635  | 23.885206 |
| C | 2.060881  | 11.651257 | 20.407099 |
| H | 1.544036  | 12.521435 | 20.017658 |
| C | 0.035931  | 5.153444  | 25.353580 |
| H | -0.434044 | 4.487322  | 26.092433 |
| H | -0.556481 | 5.090307  | 24.428874 |
| C | 7.652822  | 7.330043  | 19.554178 |
| H | 7.261761  | 7.187129  | 18.541577 |
| H | 8.714342  | 7.067934  | 19.549751 |
| C | 0.029599  | 6.565474  | 25.912850 |
| H | -0.996874 | 6.811815  | 26.221229 |
| H | 0.675163  | 6.611108  | 26.793536 |
| C | -0.307821 | 7.825398  | 23.914808 |
| H | -1.345610 | 7.987726  | 24.239935 |
| H | -0.298887 | 6.988675  | 23.202624 |
| C | 1.444636  | 3.496951  | 24.453044 |
| H | 0.997117  | 3.567505  | 23.450716 |
| H | 0.895290  | 2.732738  | 25.021931 |
| C | 7.679391  | 8.092140  | 24.734772 |
| H | 7.456537  | 8.220619  | 25.794886 |
| H | 8.126779  | 9.004208  | 24.332310 |
| H | 8.411980  | 7.286489  | 24.620713 |
| K | 2.920182  | 6.691451  | 23.779982 |
| O | 6.410370  | 4.184007  | 16.169640 |
| C | 6.395401  | 5.370126  | 15.944737 |
| O | 5.748644  | 6.283583  | 16.654564 |
| C | 5.000450  | 5.824539  | 17.801960 |
| C | 4.399919  | 7.083577  | 18.443581 |
| H | 5.677151  | 5.320311  | 18.493816 |
| H | 4.241514  | 5.115582  | 17.467603 |
| O | 4.154607  | 6.915011  | 19.812754 |
| H | 5.148587  | 7.875116  | 18.321154 |
| C | 3.130920  | 7.540189  | 17.728679 |
| H | 3.327832  | 7.703309  | 16.664128 |
| H | 2.340572  | 6.786517  | 17.817870 |
| H | 2.775422  | 8.475924  | 18.169355 |
| O | 7.060079  | 5.891736  | 14.920025 |
| C | 7.028514  | 7.308818  | 14.689970 |
| H | 7.449074  | 7.844759  | 15.542869 |
| H | 7.643580  | 7.465180  | 13.805821 |
| H | 6.006821  | 7.644757  | 14.504571 |
| C | 2.873275  | 5.628489  | 20.246989 |
| O | 2.072195  | 6.192715  | 20.915966 |
| O | 3.210498  | 4.629511  | 19.693941 |

VCo.log

SCF (wB97xd) = -3073.23223368  
 E(SCF)+ZPE(0 K)= -3072.569338  
 H(298 K)= -3072.521240  
 G(298 K)= -3072.652354  
 Lowest Frequency = 12.0094cm-1

|    |          |          |           |
|----|----------|----------|-----------|
| Co | 5.359347 | 7.348455 | 21.239836 |
| O  | 4.757415 | 5.766302 | 22.080436 |
| O  | 3.945499 | 8.350595 | 22.021198 |
| O  | 3.598084 | 3.981591 | 23.555842 |
| O  | 6.559477 | 7.797974 | 22.630315 |
| O  | 1.513388 | 8.879603 | 22.816121 |
| O  | 0.565559 | 7.565279 | 25.077028 |
| O  | 1.402738 | 4.750100 | 25.148487 |
| O  | 5.355127 | 7.372185 | 24.489622 |



|   |           |           |           |
|---|-----------|-----------|-----------|
| N | 5.996085  | 8.887243  | 20.311429 |
| N | 6.861107  | 6.457587  | 20.434863 |
| C | 3.372025  | 9.363120  | 21.462971 |
| C | 2.048170  | 9.721096  | 21.893140 |
| C | 5.431883  | 4.682949  | 22.274123 |
| C | 4.846112  | 3.674260  | 23.110669 |
| C | 7.323850  | 5.313433  | 20.789288 |
| H | 8.272955  | 4.991438  | 20.353970 |
| C | 3.300438  | 11.330286 | 19.973222 |
| H | 3.799274  | 11.948008 | 19.231344 |
| C | 6.377546  | 7.725470  | 23.907512 |
| C | 7.399467  | 8.749270  | 19.935954 |
| H | 8.003569  | 8.958557  | 20.823167 |
| H | 7.670220  | 9.449719  | 19.140714 |
| C | 7.370829  | 3.189838  | 22.008832 |
| H | 8.343896  | 3.004776  | 21.562176 |
| C | 1.413939  | 10.836473 | 21.385031 |
| H | 0.422979  | 11.108729 | 21.730589 |
| C | 3.975216  | 10.193979 | 20.483836 |
| C | 6.805415  | 2.266222  | 22.853472 |
| H | 7.322639  | 1.344612  | 23.095955 |
| C | 5.322700  | 9.948952  | 20.050728 |
| H | 5.807674  | 10.731157 | 19.461884 |
| C | 2.912053  | 3.051487  | 24.375920 |
| H | 3.393454  | 2.992334  | 25.360482 |
| H | 2.917849  | 2.055134  | 23.916307 |
| C | 6.698101  | 4.400285  | 21.706538 |
| C | 5.528296  | 2.512081  | 23.404969 |
| H | 5.091295  | 1.770005  | 24.063758 |
| C | 0.198674  | 9.114192  | 23.288124 |
| H | -0.485390 | 9.310823  | 22.453218 |
| H | 0.192556  | 9.977538  | 23.965595 |
| C | 2.038382  | 11.647055 | 20.411110 |
| H | 1.516116  | 12.515392 | 20.025005 |
| C | 0.073485  | 5.164660  | 25.397457 |
| H | -0.401619 | 4.498710  | 26.133144 |
| H | -0.518690 | 5.110066  | 24.471996 |
| C | 7.604182  | 7.303584  | 19.499576 |
| H | 7.204200  | 7.155524  | 18.491914 |
| H | 8.664981  | 7.039904  | 19.487550 |
| C | 0.077484  | 6.574228  | 25.963838 |
| H | -0.944823 | 6.822426  | 26.284064 |
| H | 0.732011  | 6.612198  | 26.838219 |
| C | -0.286926 | 7.865653  | 23.990270 |
| H | -1.313290 | 8.044317  | 24.341964 |
| H | -0.312810 | 7.036010  | 23.270140 |
| C | 1.473138  | 3.494421  | 24.504006 |
| H | 1.013272  | 3.556745  | 23.506683 |
| H | 0.932264  | 2.733444  | 25.085132 |
| C | 7.623624  | 8.117499  | 24.687228 |
| H | 7.389487  | 8.230446  | 25.746396 |
| H | 8.046752  | 9.045492  | 24.295359 |
| H | 8.378219  | 7.333487  | 24.569148 |
| K | 2.860225  | 6.649261  | 23.685698 |
| O | 6.390828  | 4.193110  | 16.088450 |
| C | 6.459792  | 5.390497  | 15.957208 |
| O | 5.810339  | 6.286124  | 16.691031 |
| C | 4.953746  | 5.781842  | 17.740422 |
| C | 4.323794  | 7.029598  | 18.368296 |
| H | 5.557133  | 5.236720  | 18.467600 |
| H | 4.217958  | 5.105908  | 17.306501 |
| O | 4.052883  | 6.869989  | 19.761649 |
| H | 5.073427  | 7.820697  | 18.318753 |

|   |          |          |           |
|---|----------|----------|-----------|
| C | 3.080461 | 7.508477 | 17.633618 |
| H | 3.324747 | 7.697239 | 16.584069 |
| H | 2.286382 | 6.756279 | 17.670135 |
| H | 2.716410 | 8.437029 | 18.081485 |
| O | 7.228330 | 5.948218 | 15.030163 |
| C | 7.293764 | 7.378266 | 14.912951 |
| H | 7.686600 | 7.820486 | 15.830512 |
| H | 7.975733 | 7.562388 | 14.085138 |
| H | 6.308244 | 7.790831 | 14.690920 |
| C | 2.962828 | 5.854710 | 20.095196 |
| O | 2.134336 | 6.298623 | 20.870322 |
| O | 3.107438 | 4.795297 | 19.498745 |

VIco-VIK.log

SCF (wB97xd) = -3072.601948  
 E(SCF)+ZPE(0 K)= -3072.555104  
 H(298 K)= -3072.554159  
 G(298 K)= -3072.683798  
 Lowest Frequency = 20.1376cm-1

|    |             |             |             |
|----|-------------|-------------|-------------|
| Co | 2.48259600  | 6.27956500  | 23.32784000 |
| K  | 5.42837500  | 7.57360600  | 21.62608500 |
| O  | 2.91309400  | 7.95123300  | 22.52816700 |
| O  | 3.96652200  | 5.52878800  | 22.39918700 |
| O  | 4.08447900  | 9.98856800  | 21.43508900 |
| O  | 3.46660600  | 6.64355600  | 24.92802900 |
| O  | 5.75286100  | 4.98657100  | 20.60442700 |
| O  | 7.70596800  | 6.92521400  | 20.08932600 |
| O  | 6.54552000  | 9.61522000  | 20.10277000 |
| O  | 5.38594200  | 7.62027400  | 24.26743300 |
| N  | 2.02111100  | 4.62032900  | 24.13748800 |
| N  | 0.97403800  | 6.98976300  | 24.23777800 |
| C  | 4.17832900  | 4.26958400  | 22.18785800 |
| C  | 5.17431800  | 3.91618700  | 21.21839100 |
| C  | 2.55098000  | 9.10654200  | 22.97586700 |
| C  | 3.18756600  | 10.26860900 | 22.42188300 |
| C  | 0.75957100  | 8.22996600  | 24.47176400 |
| H  | -0.09708800 | 8.49320100  | 25.09746400 |
| C  | 3.83777700  | 1.86474600  | 22.56203000 |
| H  | 3.31130600  | 1.07344400  | 23.08867200 |
| C  | 4.59952000  | 7.21687900  | 25.12630200 |
| C  | 1.01402600  | 4.79174800  | 25.18037900 |
| H  | 1.52986600  | 5.06823100  | 26.10545500 |
| H  | 0.45009300  | 3.86911600  | 25.34273600 |
| C  | 1.23680100  | 10.63515300 | 24.38884000 |
| H  | 0.46211800  | 10.76896400 | 25.13910800 |
| C  | 5.47918700  | 2.59532300  | 20.95716000 |
| H  | 6.23928100  | 2.33910800  | 20.22756500 |
| C  | 3.50757300  | 3.21073500  | 22.84589600 |
| C  | 1.90368100  | 11.72278600 | 23.87725100 |
| H  | 1.67762300  | 12.72604400 | 24.22120100 |
| C  | 2.48756100  | 3.46866700  | 23.83506500 |
| H  | 2.08402000  | 2.59898100  | 24.35898600 |
| C  | 4.76920200  | 11.05966800 | 20.80846500 |
| H  | 5.43835800  | 11.55009900 | 21.52742200 |
| H  | 4.05522100  | 11.79987300 | 20.42507800 |
| C  | 1.54475800  | 9.32375200  | 23.95193300 |
| C  | 2.88402500  | 11.53460500 | 22.87828000 |
| H  | 3.39228200  | 12.40254000 | 22.47311800 |
| C  | 6.79504300  | 4.75576500  | 19.67259100 |
| H  | 6.44923200  | 4.10309500  | 18.86063700 |
| H  | 7.64889000  | 4.28272500  | 20.17407900 |

|   |             |             |             |
|---|-------------|-------------|-------------|
| C | 4.80675600  | 1.55716300  | 21.63535600 |
| H | 5.05979100  | 0.52547200  | 21.41772600 |
| C | 7.39170900  | 9.15019600  | 19.06885800 |
| H | 7.98980200  | 9.98008600  | 18.66368700 |
| H | 6.78749000  | 8.74069400  | 18.24804700 |
| C | 0.10396300  | 5.93082200  | 24.73548200 |
| H | -0.52112700 | 5.58901500  | 23.90478000 |
| H | -0.53066700 | 6.28449500  | 25.55312400 |
| C | 8.34125700  | 8.10442600  | 19.62579700 |
| H | 9.08215400  | 7.85697200  | 18.85207900 |
| H | 8.86873100  | 8.51477100  | 20.49058600 |
| C | 7.20102900  | 6.08247700  | 19.07388800 |
| H | 7.96712900  | 5.89762400  | 18.30757300 |
| H | 6.33367000  | 6.54310000  | 18.58337800 |
| C | 5.55270100  | 10.51032500 | 19.63927200 |
| H | 4.88063700  | 9.99408000  | 18.93961300 |
| H | 6.01780000  | 11.35688000 | 19.11323600 |
| C | 4.91644700  | 7.39907600  | 26.60365900 |
| H | 4.29058500  | 8.20500100  | 27.00061300 |
| H | 5.96527300  | 7.66547400  | 26.74101400 |
| H | 4.68204100  | 6.49150600  | 27.16474400 |
| O | 1.40470900  | 5.98469200  | 21.75058500 |
| C | 0.73281200  | 5.01685800  | 21.27493100 |
| O | 0.12657700  | 4.12292800  | 21.85069500 |
| O | 0.66398400  | 5.00806800  | 19.90062400 |
| C | 1.31995400  | 6.04783700  | 19.16432600 |
| H | 1.15871700  | 7.00290100  | 19.67252700 |
| C | 0.69488700  | 6.06977000  | 17.78143900 |
| C | 2.82332100  | 5.76345600  | 19.15093500 |
| H | -0.37582200 | 6.27600300  | 17.85543000 |
| H | 1.15000300  | 6.85534200  | 17.17159900 |
| H | 0.83768200  | 5.11065800  | 17.27466200 |
| H | 3.06071300  | 4.89048700  | 18.53888700 |
| H | 3.18759000  | 5.63250600  | 20.16739500 |
| O | 3.52298900  | 6.91834900  | 18.65094700 |
| C | 4.01448700  | 6.87727500  | 17.42090200 |
| O | 3.96089700  | 5.94851700  | 16.65135900 |
| O | 4.60078100  | 8.04514100  | 17.17733900 |
| C | 5.20604400  | 8.19258700  | 15.88657300 |
| H | 5.60909600  | 9.20359600  | 15.87372600 |
| H | 6.00743200  | 7.46188200  | 15.75690500 |
| H | 4.45928700  | 8.07035900  | 15.10008300 |

TS3Co.log

SCF (wB97xd) = -3073.214560  
E(SCF)+ZPE(0 K)= -3072.552290  
H(298 K)= -3072.505172  
G(298 K)= -3072.631852  
Lowest Frequency = -601.5359cm-1

|    |          |           |           |
|----|----------|-----------|-----------|
| Co | 2.258477 | 6.742741  | 23.647852 |
| K  | 4.938878 | 7.815133  | 21.443496 |
| O  | 2.853871 | 8.435508  | 23.013626 |
| O  | 3.387497 | 5.911222  | 22.359737 |
| O  | 4.408707 | 10.376487 | 22.167369 |
| O  | 3.526068 | 6.706509  | 25.050756 |
| O  | 5.052280 | 5.254609  | 20.452614 |
| O  | 7.407175 | 6.834648  | 20.428001 |
| O  | 6.851845 | 9.715441  | 20.851017 |
| O  | 5.451018 | 7.342942  | 24.061691 |
| N  | 1.609914 | 5.080021  | 24.325498 |
| N  | 1.042367 | 7.540909  | 24.873181 |

|   |           |           |           |
|---|-----------|-----------|-----------|
| C | 3.467142  | 4.647616  | 22.089734 |
| C | 4.363763  | 4.237453  | 21.047588 |
| C | 2.834077  | 9.530186  | 23.703882 |
| C | 3.668621  | 10.621980 | 23.283794 |
| C | 1.097235  | 8.744229  | 25.306467 |
| H | 0.386367  | 9.043386  | 26.080807 |
| C | 2.893456  | 2.269315  | 22.375956 |
| H | 2.323037  | 1.511843  | 22.906664 |
| C | 4.780657  | 7.012594  | 25.036909 |
| C | 0.780441  | 5.258461  | 25.514654 |
| H | 1.443161  | 5.308382  | 26.384769 |
| H | 0.082967  | 4.426098  | 25.642664 |
| C | 2.049679  | 10.985878 | 25.535160 |
| H | 1.408131  | 11.117651 | 26.402183 |
| C | 4.491999  | 2.908053  | 20.697999 |
| H | 5.170027  | 2.614041  | 19.904710 |
| C | 2.742949  | 3.625251  | 22.753024 |
| C | 2.880144  | 11.999710 | 25.122595 |
| H | 2.915215  | 12.943610 | 25.655188 |
| C | 1.864937  | 3.915833  | 23.858123 |
| H | 1.394663  | 3.057397  | 24.344239 |
| C | 5.357181  | 11.349428 | 21.754108 |
| H | 6.078228  | 11.533408 | 22.561072 |
| H | 4.852618  | 12.291760 | 21.505185 |
| C | 2.018738  | 9.751042  | 24.844241 |
| C | 3.691969  | 11.811848 | 23.984695 |
| H | 4.337213  | 12.622298 | 23.665417 |
| C | 6.191719  | 4.917873  | 19.671811 |
| H | 5.888917  | 4.391969  | 18.757372 |
| H | 6.854466  | 4.266596  | 20.255563 |
| C | 3.749291  | 1.910686  | 21.362239 |
| H | 3.866128  | 0.872539  | 21.072017 |
| C | 7.579652  | 9.202707  | 19.747783 |
| H | 8.342678  | 9.929540  | 19.430006 |
| H | 6.896181  | 9.023760  | 18.906615 |
| C | 0.050636  | 6.584383  | 25.348979 |
| H | -0.725198 | 6.490310  | 24.582620 |
| H | -0.407202 | 6.914214  | 26.285786 |
| C | 8.280144  | 7.921745  | 20.167929 |
| H | 9.005643  | 7.645126  | 19.389492 |
| H | 8.825549  | 8.096466  | 21.099347 |
| C | 6.916439  | 6.182042  | 19.271462 |
| H | 7.749100  | 5.895774  | 18.612534 |
| H | 6.241617  | 6.840825  | 18.712732 |
| C | 6.067994  | 10.845358 | 20.519540 |
| H | 5.340013  | 10.577459 | 19.741301 |
| H | 6.707309  | 11.656114 | 20.139761 |
| C | 5.403963  | 6.955686  | 26.423560 |
| H | 5.079903  | 7.835222  | 26.989428 |
| H | 6.492278  | 6.963397  | 26.351762 |
| H | 5.067999  | 6.069425  | 26.966381 |
| O | 0.760373  | 6.700999  | 22.317448 |
| C | 1.029418  | 6.785379  | 21.096308 |
| O | 1.169167  | 5.833475  | 20.288390 |
| O | 1.175877  | 8.011745  | 20.580047 |
| C | 1.425031  | 7.976428  | 19.162878 |
| H | 2.113102  | 8.800621  | 18.990299 |
| C | 0.131904  | 8.159020  | 18.389605 |
| C | 2.125558  | 6.662591  | 18.853236 |
| H | -0.560579 | 7.335264  | 18.586549 |
| H | -0.344431 | 9.100227  | 18.672863 |
| H | 0.351439  | 8.186028  | 17.319181 |
| H | 1.711126  | 5.967329  | 18.139996 |

|   |          |          |           |
|---|----------|----------|-----------|
| H | 3.058218 | 6.412663 | 19.341425 |
| O | 3.155678 | 7.373617 | 17.333127 |
| C | 4.162560 | 8.076355 | 17.658315 |
| O | 4.485058 | 8.439414 | 18.793522 |
| O | 4.982001 | 8.471597 | 16.649830 |
| C | 4.659509 | 8.062676 | 15.322152 |
| H | 3.684690 | 8.451907 | 15.017860 |
| H | 5.440940 | 8.482010 | 14.688370 |
| H | 4.656344 | 6.972993 | 15.237960 |

IXCo.log

SCF (wB97xd) = -3072.593243  
 E(SCF)+ZPE(0 K)= -3072.546377  
 H(298 K)= -3072.545432  
 G(298 K)= -3072.673336  
 Lowest Frequency = 25.4349cm-1

|    |            |             |             |
|----|------------|-------------|-------------|
| Co | 2.15022600 | 6.52772500  | 23.87928400 |
| K  | 4.75224000 | 7.50302400  | 21.49983200 |
| O  | 2.66464500 | 8.16055100  | 23.06790100 |
| O  | 3.27816100 | 5.61949300  | 22.65540300 |
| O  | 4.02190000 | 10.07893800 | 21.93581500 |
| O  | 3.44050400 | 6.67164800  | 25.24204000 |
| O  | 4.77471400 | 4.88458500  | 20.67988200 |
| O  | 6.78519700 | 6.60473900  | 19.74288100 |
| O  | 6.13426200 | 9.48908100  | 20.11001300 |
| O  | 5.31890100 | 7.27850900  | 24.14906200 |
| N  | 1.57824500 | 4.90833100  | 24.71880100 |
| N  | 0.92429500 | 7.38621000  | 25.05809200 |
| C  | 3.32416700 | 4.34558000  | 22.43779600 |
| C  | 4.14597900 | 3.88693400  | 21.35256100 |
| C  | 2.57000000 | 9.32694600  | 23.62067300 |
| C  | 3.30908600 | 10.41412200 | 23.04131900 |
| C  | 0.92518700 | 8.63275300  | 25.35542700 |
| H  | 0.22979100 | 8.97549600  | 26.12548100 |
| C  | 2.76622400 | 1.98590800  | 22.86581800 |
| H  | 2.22981500 | 1.25507800  | 23.46484500 |
| C  | 4.68292700 | 7.02124400  | 25.16722300 |
| C  | 0.81969300 | 5.16816000  | 25.93927500 |
| H  | 1.53422800 | 5.33449400  | 26.75176100 |
| H  | 0.17413000 | 4.32355900  | 26.19533000 |
| C  | 1.72289800 | 10.94118400 | 25.28300900 |
| H  | 1.09078800 | 11.13578300 | 26.14512200 |
| C  | 4.25391500 | 2.54362000  | 21.05660000 |
| H  | 4.88258700 | 2.21233200  | 20.23750400 |
| C  | 2.63742500 | 3.35975100  | 23.18838700 |
| C  | 2.47286000 | 11.94874900 | 24.72790400 |
| H  | 2.45547900 | 12.95034300 | 25.14305400 |
| C  | 1.82514600 | 3.71458500  | 24.32290900 |
| H  | 1.39950100 | 2.88840900  | 24.89780300 |
| C  | 4.74736000 | 11.08746200 | 21.24918600 |
| H  | 5.60086900 | 11.41343500 | 21.85813200 |
| H  | 4.10108800 | 11.95195800 | 21.05105600 |
| C  | 1.76405800 | 9.63027300  | 24.74749600 |
| C  | 3.27120600 | 11.67793000 | 23.59637300 |
| H  | 3.85816100 | 12.48184300 | 23.16691100 |
| C  | 5.55196100 | 4.56975100  | 19.53651700 |
| H  | 4.96045600 | 3.97891600  | 18.82496600 |
| H  | 6.43781500 | 3.99301200  | 19.83238500 |
| C  | 3.55633800 | 1.58047600  | 21.81755300 |
| H  | 3.65545900 | 0.52947100  | 21.56985100 |
| C  | 6.54113600 | 8.91081200  | 18.88260200 |

|   |             |             |             |
|---|-------------|-------------|-------------|
| H | 7.11304400  | 9.64396900  | 18.29265600 |
| H | 5.65405900  | 8.61827100  | 18.30482200 |
| C | 0.01566400  | 6.43764100  | 25.69450700 |
| H | -0.80816800 | 6.22944600  | 25.00360200 |
| H | -0.39563800 | 6.84146200  | 26.62367900 |
| C | 7.43751700  | 7.71435600  | 19.15028200 |
| H | 7.90583700  | 7.41218800  | 18.20194300 |
| H | 8.22938700  | 8.00100500  | 19.84779800 |
| C | 5.95051200  | 5.86525000  | 18.86652200 |
| H | 6.49232000  | 5.62085600  | 17.94109700 |
| H | 5.04702700  | 6.43672000  | 18.61406000 |
| C | 5.19892300  | 10.53553300 | 19.91823100 |
| H | 4.32953200  | 10.15184100 | 19.36852600 |
| H | 5.66093700  | 11.35573300 | 19.34784300 |
| C | 5.33317500  | 7.12214800  | 26.53850900 |
| H | 4.99228200  | 8.04422000  | 27.02044300 |
| H | 6.41909900  | 7.15494000  | 26.44237700 |
| H | 5.03529600  | 6.28525200  | 27.17388700 |
| O | 0.65504600  | 6.23520000  | 22.57588400 |
| C | -0.03422400 | 7.03702500  | 21.96120500 |
| O | -0.97923100 | 6.62658800  | 21.14187900 |
| O | 0.04651800  | 8.33498900  | 22.06727300 |
| C | -0.83173400 | 8.97074100  | 21.09319500 |
| H | -0.16674200 | 9.38694400  | 20.33181900 |
| C | -1.65960100 | 10.02677100 | 21.78580100 |
| C | -1.61951900 | 7.76889800  | 20.53873300 |
| H | -2.27217100 | 9.58794600  | 22.57892400 |
| H | -1.01320600 | 10.79628300 | 22.21455100 |
| H | -2.32030900 | 10.50195200 | 21.05506200 |
| H | -2.66756200 | 7.76254400  | 20.84460600 |
| H | -1.52690700 | 7.67089300  | 19.45859500 |
| O | 1.65509800  | 9.43185200  | 19.03893600 |
| C | 2.17399400  | 8.30648300  | 19.14571300 |
| O | 3.37488800  | 7.97901100  | 19.10064100 |
| O | 1.24465200  | 7.28626300  | 19.34441200 |
| C | 1.75372900  | 5.96160200  | 19.43139400 |
| H | 2.41153900  | 5.84712900  | 20.29581100 |
| H | 0.88286700  | 5.31279500  | 19.54317500 |
| H | 2.30651800  | 5.68935200  | 18.52688800 |

VII Co.log

SCF (wB97xd) = -3265.613889  
 E(SCF)+ZPE(0 K)= -3265.561354  
 H(298 K)= -3265.560410  
 G(298 K)= -3265.701869  
 Lowest Frequency = 13.6213cm-1

|    |            |            |             |
|----|------------|------------|-------------|
| Co | 4.56196400 | 6.82226800 | 20.99089300 |
| O  | 3.58400700 | 5.32444900 | 21.64870200 |
| O  | 3.41499600 | 7.97335500 | 21.95916600 |
| O  | 2.36362400 | 3.73534300 | 23.35602200 |
| O  | 5.90587600 | 6.73108100 | 22.31162200 |
| O  | 1.50743600 | 9.07372100 | 23.31819500 |
| O  | 0.63646900 | 7.77223400 | 25.65632800 |
| O  | 0.74805600 | 4.81620500 | 25.43922700 |
| O  | 4.75634200 | 6.38700800 | 24.21923300 |
| N  | 5.54086500 | 8.26691400 | 20.21572600 |
| N  | 5.66004400 | 5.70290200 | 19.91035800 |
| C  | 3.32596500 | 9.26154600 | 21.85374600 |
| C  | 2.28691700 | 9.91775100 | 22.59565800 |
| C  | 4.11846100 | 4.15461900 | 21.84519200 |
| C  | 3.49811400 | 3.25903400 | 22.77519100 |

|   |             |             |             |
|---|-------------|-------------|-------------|
| C | 5.91123700  | 4.46942400  | 20.14664600 |
| H | 6.66537100  | 3.97021600  | 19.53368800 |
| C | 3.99708500  | 11.48257500 | 21.03276900 |
| H | 4.66953700  | 12.08149600 | 20.42477200 |
| C | 5.79766300  | 6.51422300  | 23.58070200 |
| C | 6.71437200  | 7.79746900  | 19.48268000 |
| H | 7.52853600  | 7.65681100  | 20.20090200 |
| H | 7.02532600  | 8.51991000  | 18.72338100 |
| C | 5.79917100  | 2.39766500  | 21.44001200 |
| H | 6.68089200  | 2.06655100  | 20.89843900 |
| C | 2.13238000  | 11.28824700 | 22.54432500 |
| H | 1.34568800  | 11.77219400 | 23.11240700 |
| C | 4.17648100  | 10.07717000 | 21.06869700 |
| C | 5.20930200  | 1.58321400  | 22.37714300 |
| H | 5.61762300  | 0.60367800  | 22.59969300 |
| C | 5.26469600  | 9.51507400  | 20.31117000 |
| H | 5.91003200  | 10.22200600 | 19.78399800 |
| C | 1.69491400  | 2.92528900  | 24.31245000 |
| H | 2.34940400  | 2.74622700  | 25.17486300 |
| H | 1.41953700  | 1.96166300  | 23.86485000 |
| C | 5.26882800  | 3.67896900  | 21.16656400 |
| C | 4.04561200  | 2.01779700  | 23.03983200 |
| H | 3.57834600  | 1.35654100  | 23.76012700 |
| C | 0.48102300  | 9.60802400  | 24.13955700 |
| H | -0.23209900 | 10.18263500 | 23.53436000 |
| H | 0.91808200  | 10.26736900 | 24.90065900 |
| C | 2.99359200  | 12.08104400 | 21.75534500 |
| H | 2.85548700  | 13.15622900 | 21.72946900 |
| C | -0.40516600 | 5.53901000  | 25.84526700 |
| H | -0.97975800 | 4.94590100  | 26.57336300 |
| H | -1.04943600 | 5.73651300  | 24.97628300 |
| C | 6.34048200  | 6.45638000  | 18.86334800 |
| H | 5.63939300  | 6.60991600  | 18.03646300 |
| H | 7.21879600  | 5.92215400  | 18.49113000 |
| C | 0.02194800  | 6.83113000  | 26.51872200 |
| H | -0.86002700 | 7.27968800  | 26.99914400 |
| H | 0.76100700  | 6.61196100  | 27.29435300 |
| C | -0.25359500 | 8.45710100  | 24.78922300 |
| H | -1.09750000 | 8.86984500  | 25.36117500 |
| H | -0.64708800 | 7.78065700  | 24.01829900 |
| C | 0.42960200  | 3.62891000  | 24.74593100 |
| H | -0.19174900 | 3.85926600  | 23.86940300 |
| H | -0.13633700 | 2.94411500  | 25.39481100 |
| C | 7.15009300  | 6.38623600  | 24.26318500 |
| H | 7.04462400  | 6.50738100  | 25.34199600 |
| H | 7.85975700  | 7.11576300  | 23.86756800 |
| H | 7.54842400  | 5.38702600  | 24.05817900 |
| K | 2.11270100  | 6.42678300  | 23.65145900 |
| O | -2.24815400 | 5.93186300  | 22.96107200 |
| C | -1.31391300 | 5.68403500  | 22.18491900 |
| O | -0.14234100 | 6.10882400  | 22.19524800 |
| C | 1.87620800  | 6.96254900  | 19.61132600 |
| C | 2.54724000  | 5.86987400  | 18.90694200 |
| H | 1.53764500  | 6.80800100  | 20.63184200 |
| H | 1.38457500  | 7.74743700  | 19.04325000 |
| O | 3.31338000  | 6.98159000  | 19.44889300 |
| H | 2.69070000  | 4.95811600  | 19.47753900 |
| C | 2.56859200  | 5.74640200  | 17.41471700 |
| H | 1.74487100  | 5.09758500  | 17.10252700 |
| H | 2.45130300  | 6.72098600  | 16.93406900 |
| H | 3.50415600  | 5.28936100  | 17.08026800 |
| C | -0.68713400 | 4.43255800  | 20.20076200 |
| H | -0.04955700 | 5.29656600  | 20.00079200 |

|   |             |             |             |
|---|-------------|-------------|-------------|
| O | -1.66653900 | 4.78528500  | 21.16923400 |
| C | -1.41303800 | 4.01036300  | 18.93549700 |
| C | 0.17759500  | 3.31907900  | 20.78339900 |
| H | -2.00365400 | 4.84213400  | 18.54283800 |
| H | -0.69134400 | 3.70673100  | 18.17200800 |
| H | -2.08307100 | 3.16808700  | 19.13686800 |
| H | -0.40308800 | 2.40195800  | 20.91663800 |
| H | 0.61211100  | 3.63345700  | 21.73444600 |
| O | 1.25264600  | 3.08695700  | 19.85913400 |
| C | 1.90019200  | 1.93433000  | 19.94936100 |
| O | 1.62951600  | 1.02128900  | 20.69224700 |
| O | 2.89401900  | 1.95313700  | 19.07049800 |
| C | 3.70205300  | 0.77200200  | 19.00721200 |
| H | 4.48407200  | 0.99765700  | 18.28463800 |
| H | 4.13904000  | 0.56108700  | 19.98463100 |
| H | 3.10492200  | -0.07722500 | 18.66788900 |

TS1Co\*.log

SCF (wB97xd) = -3265.583489  
 E(SCF)+ZPE(0 K)= -3265.531809  
 H(298 K)= -3265.530865  
 G(298 K)= -3265.670705  
 Lowest Frequency = -550.9013cm-1

|    |            |             |             |
|----|------------|-------------|-------------|
| Co | 4.63241500 | 7.04714000  | 21.11782600 |
| O  | 3.59510800 | 5.56972800  | 21.74803400 |
| O  | 3.58092800 | 8.18793600  | 22.21416900 |
| O  | 2.31926300 | 3.94934200  | 23.34440300 |
| O  | 6.00631700 | 6.76980100  | 22.43156900 |
| O  | 1.60157000 | 9.27462200  | 23.47929400 |
| O  | 0.43632200 | 7.89736300  | 25.64473300 |
| O  | 0.49676300 | 4.96338700  | 25.26711200 |
| O  | 4.90796600 | 6.39256500  | 24.36174000 |
| N  | 5.69299100 | 8.48300600  | 20.44727400 |
| N  | 5.65653300 | 5.94231700  | 19.95159900 |
| C  | 3.48579600 | 9.47254500  | 22.09985500 |
| C  | 2.42254000 | 10.12647100 | 22.80813800 |
| C  | 4.02622000 | 4.34530700  | 21.78487600 |
| C  | 3.36419400 | 3.41785200  | 22.65447800 |
| C  | 5.77983900 | 4.67184400  | 20.03957100 |
| H  | 6.46932700 | 4.17164600  | 19.35494700 |
| C  | 4.19359600 | 11.69960300 | 21.32750900 |
| H  | 4.88617100 | 12.30223500 | 20.74601700 |
| C  | 5.93235400 | 6.47974400  | 23.68164100 |
| C  | 6.84332900 | 7.99653400  | 19.69295000 |
| H  | 7.63577000 | 7.74766000  | 20.40602300 |
| H  | 7.21202400 | 8.75178000  | 18.99334000 |
| C  | 5.45007200 | 2.47186000  | 21.05737600 |
| H  | 6.25244400 | 2.11176200  | 20.41929400 |
| C  | 2.28253600 | 11.49929400 | 22.77895600 |
| H  | 1.48298900 | 11.98224300 | 23.32954300 |
| C  | 4.35991900 | 10.29323200 | 21.34429400 |
| C  | 4.81570600 | 1.61672600  | 21.92685100 |
| H  | 5.10768300 | 0.57468900  | 21.99580400 |
| C  | 5.45266400 | 9.73263200  | 20.58814000 |
| H  | 6.12508800 | 10.44229500 | 20.09933000 |
| C  | 1.51948500 | 3.10287100  | 24.15605700 |
| H  | 2.06423200 | 2.83772300  | 25.07099300 |
| H  | 1.26636100 | 2.17989900  | 23.61882400 |
| C  | 5.07739200 | 3.83454100  | 20.98261700 |
| C  | 3.76524200 | 2.09893500  | 22.73245900 |
| H  | 3.26765900 | 1.41363800  | 23.40882500 |

C 0.51294000 9.80951900 24.21448500  
H -0.11537900 10.43422300 23.56654000  
H 0.88716400 10.42040600 25.04619700  
C 3.17631800 12.29710000 22.03276400  
H 3.05007400 13.37405500 22.02213300  
C -0.67757600 5.69617900 25.56795000  
H -1.35964200 5.08185000 26.17551000  
H -1.19192600 5.96443300 24.63483600  
C 6.38924200 6.73306100 18.96994200  
H 5.69962200 6.99627800 18.16171400  
H 7.23511300 6.17664000 18.55661500  
C -0.30717000 6.93217500 26.36804200  
H -1.22889700 7.38403200 26.76251200  
H 0.32236400 6.64179900 27.21358800  
C -0.32614600 8.66183300 24.72578100  
H -1.21191800 9.08124500 25.22481300  
H -0.65303800 8.04317300 23.88016000  
C 0.23136500 3.82582400 24.46957700  
H -0.25821700 4.13020900 23.53387700  
H -0.43115800 3.13067000 25.00706700  
C 7.29152000 6.19928200 24.30707600  
H 7.23380900 6.26108200 25.39476300  
H 8.04690700 6.89141100 23.92870600  
H 7.59925400 5.18559200 24.02910900  
K 2.27545200 6.61734400 23.90551200  
O -0.43387600 6.42669200 22.22277600  
C -0.47878900 5.84497400 21.13739200  
O -0.11035700 6.26921400 20.00531800  
C 1.66033900 7.21080200 20.01755300  
C 2.54634800 6.41074000 19.18182600  
H 1.71913200 7.10872100 21.08949800  
H 1.24943000 8.12145400 19.60378700  
O 3.43972900 7.41057500 19.64452100  
H 2.77324400 5.41828500 19.57367500  
C 2.35653600 6.40734600 17.68577700  
H 1.52643800 5.74589700 17.41990900  
H 2.13941000 7.41453400 17.31788200  
H 3.26357900 6.04000000 17.19653300  
C -0.54128800 3.65205300 20.16249300  
H -0.50508900 4.16083000 19.19550600  
O -0.99716400 4.56315600 21.16847300  
C -1.50127600 2.48024800 20.12082900  
C 0.87461000 3.26073100 20.58322200  
H -2.49679300 2.81205800 19.81543700  
H -1.15083600 1.73694600 19.39860700  
H -1.57129200 2.00263700 21.10312100  
H 0.84279900 2.60595300 21.45494000  
H 1.45077300 4.15537500 20.82541000  
O 1.58393200 2.61366600 19.52108600  
C 1.92782800 1.33972900 19.68693300  
O 1.57048300 0.61181000 20.58109200  
O 2.73093200 1.00012800 18.68853400  
C 3.22954500 -0.34258100 18.71480900  
H 3.85346300 -0.43514900 17.82820200  
H 3.82351500 -0.50460600 19.61688700  
H 2.40512700 -1.05725500 18.67690900

Lowest Frequency = 27.1392cm<sup>-1</sup>

Co 0.16394800 -0.29817200 -0.24264700  
O 0.11457800 -0.14542000 1.66011000  
O 2.05635100 -0.29930800 -0.12927900  
O 0.60816800 -0.32196900 4.19929000  
O -0.00377500 -2.21105700 -0.21175500  
O 4.55390400 -0.16231800 0.53346100  
O 5.39143100 -0.92460900 3.12122000  
O 3.27060200 -0.52981800 5.14605400  
O 1.35990700 -2.96391100 1.41512300  
N 0.14920500 -0.48586100 -2.14044700  
N -1.73652500 -0.25415200 -0.38312000  
C 2.89503400 -0.41498300 -1.10550000  
C 4.29333100 -0.35575800 -0.78931600  
C -0.88293100 -0.50296200 2.39950100  
C -0.65868200 -0.63343500 3.81259000  
C -2.56360600 -0.51113100 0.55821000  
H -3.62924400 -0.53729700 0.31557600  
C 3.55326600 -0.72469700 -3.45522000  
H 3.25365700 -0.86159700 -4.49095000  
C 0.51631000 -3.12069200 0.52966700  
C -1.20163400 -0.66309900 -2.67412900  
H -1.42936400 -1.73428600 -2.67156700  
H -1.27637300 -0.28519600 -3.69772100  
C -3.22416800 -1.13843800 2.83367100  
H -4.22409200 -1.31176800 2.44483300  
C 5.25556900 -0.48546100 -1.77033200  
H 6.30900400 -0.44425900 -1.51653100  
C 2.54894400 -0.59389900 -2.46679400  
C -2.96161000 -1.30322200 4.17273000  
H -3.74009000 -1.61954100 4.85820100  
C 1.17524400 -0.61949900 -2.89567200  
H 1.00284600 -0.77721000 -3.96369000  
C 0.92558800 -0.32291900 5.57994600  
H 0.90762700 -1.34805300 5.97248800  
H 0.20181700 0.28407800 6.13880900  
C -2.20291800 -0.74243900 1.93614400  
C -1.66471300 -1.04063800 4.66468700  
H -1.47095200 -1.16209000 5.72472800  
C 5.90294700 -0.07179300 0.95475100  
H 6.40907500 0.75478600 0.43859000  
H 6.43270500 -1.00767200 0.73398200  
C 4.88558600 -0.67500800 -3.11908500  
H 5.65538700 -0.77647900 -3.87610900  
C 4.57408500 0.01078600 5.25080700  
H 4.87322000 0.07425300 6.30819600  
H 4.58936800 1.02551700 4.82854600  
C -2.15948600 0.06304800 -1.73977400  
H -2.06640300 1.14561700 -1.87433700  
H -3.19768500 -0.23165300 -1.91852200  
C 5.55352900 -0.89587600 4.52788000  
H 6.57660900 -0.58534100 4.78427800  
H 5.41176000 -1.92532100 4.86803400  
C 5.91861900 0.19995800 2.44051400  
H 6.95925200 0.37698000 2.74840200  
H 5.32875900 1.10014300 2.65690900  
C 2.29423400 0.29209500 5.75050100  
H 2.30997600 1.29123200 5.29309300  
H 2.49595300 0.39719200 6.82691400  
C -0.03923100 -4.50842800 0.24047700  
H -1.03845700 -4.58404300 0.68211700  
H 0.59827300 -5.27691200 0.67995300

IK.log

SCF (wB97xd) = -2884.65871762  
E(SCF)+ZPE(0 K)= -2884.012769  
H(298 K)= -2883.966741  
G(298 K)= -2884.091051

|   |             |             |             |
|---|-------------|-------------|-------------|
| H | -0.13925900 | -4.67102000 | -0.83506600 |
| K | 2.63922600  | -0.88373000 | 2.42150300  |
| O | 0.06072200  | 1.62819600  | -0.29971000 |
| C | 0.73255900  | 2.49137900  | -0.95104600 |
| O | 1.59521800  | 2.33193500  | -1.80414800 |
| C | 1.82384900  | 2.56932100  | 2.71782400  |
| C | 2.77933700  | 2.45456000  | 1.61643400  |
| H | 0.94765900  | 1.92434000  | 2.72204300  |
| H | 1.75061800  | 3.50784800  | 3.26560500  |
| O | 3.06349000  | 1.87236700  | 2.89909000  |
| H | 2.56149400  | 1.70396300  | 0.85840900  |
| C | 3.66323700  | 3.59014800  | 1.18789200  |
| H | 3.19004200  | 4.12902400  | 0.36126900  |
| H | 3.83549100  | 4.28845100  | 2.01243300  |
| H | 4.62884600  | 3.21009000  | 0.83882100  |
| O | 0.42473600  | 3.78757000  | -0.63593600 |
| C | -0.57458600 | 4.02551500  | 0.34862200  |
| H | -0.29675200 | 3.58095700  | 1.30747700  |
| H | -0.64032200 | 5.10983200  | 0.44678600  |
| H | -1.54146700 | 3.62175600  | 0.03537500  |

TS1K.log

SCF (wB97xd) = -2884.60513446  
E(SCF)+ZPE(0 K)= -2883.959750  
H(298 K)= -2883.914698  
G(298 K)= -2884.036085  
Lowest Frequency = -536.5062cm-1

|    |             |             |             |
|----|-------------|-------------|-------------|
| Co | 0.01702300  | -0.26157100 | -0.04336400 |
| O  | 0.07133500  | -0.08876500 | 1.84509800  |
| O  | 1.90976300  | -0.32302100 | -0.03353000 |
| O  | 0.72829900  | -0.38449800 | 4.35016200  |
| O  | -0.19912300 | -2.13919800 | -0.01208400 |
| O  | 4.43928900  | -0.18305900 | 0.51136500  |
| O  | 5.41469200  | -1.26465100 | 2.95756000  |
| O  | 3.43506600  | -0.87650400 | 5.17099800  |
| O  | 1.20905000  | -2.90245100 | 1.57448700  |
| N  | -0.09094400 | -0.41180200 | -1.94371700 |
| N  | -1.88680800 | -0.18488600 | -0.08814900 |
| C  | 2.69524100  | -0.20080200 | -1.05667900 |
| C  | 4.10553100  | -0.11969200 | -0.80425500 |
| C  | -0.88347800 | -0.44316100 | 2.64589700  |
| C  | -0.57156900 | -0.62095900 | 4.03654600  |
| C  | -2.66218100 | -0.42407300 | 0.90271100  |
| H  | -3.73769900 | -0.46428100 | 0.71349700  |
| C  | 3.21760000  | -0.02612100 | -3.45496000 |
| H  | 2.86251800  | -0.00105900 | -4.48150400 |
| C  | 0.33784400  | -3.05394100 | 0.72165700  |
| C  | -1.45431500 | -0.68662900 | -2.38984100 |
| H  | -1.61623900 | -1.76679100 | -2.32026900 |
| H  | -1.60740400 | -0.36795800 | -3.42501900 |
| C  | -3.21313200 | -1.01640800 | 3.21293600  |
| H  | -4.23889900 | -1.15606600 | 2.88261900  |
| C  | 5.00599000  | 0.00879100  | -1.84268300 |
| H  | 6.07001900  | 0.06327300  | -1.64244800 |
| C  | 2.27249000  | -0.16118900 | -2.40808500 |
| C  | -2.87473700 | -1.20563600 | 4.53108800  |
| H  | -3.62022700 | -1.50318800 | 5.26016300  |
| C  | 0.88597000  | -0.32403000 | -2.76788700 |
| H  | 0.66274700  | -0.39315400 | -3.83568700 |
| C  | 1.13813300  | -0.44180400 | 5.70751800  |
| H  | 1.05713100  | -1.46975300 | 6.08443700  |

|   |             |             |             |
|---|-------------|-------------|-------------|
| H | 0.50554100  | 0.21286200  | 6.32068000  |
| C | -2.23373000 | -0.64079600 | 2.26107800  |
| C | -1.54055100 | -1.00235200 | 4.94295400  |
| H | -1.28527500 | -1.15168900 | 5.98616900  |
| C | 5.81233200  | -0.15244600 | 0.87118500  |
| H | 6.29522800  | 0.73939300  | 0.45086100  |
| H | 6.31767400  | -1.04754000 | 0.48562900  |
| C | 4.56070900  | 0.06360500  | -3.18087700 |
| H | 5.28554000  | 0.16649600  | -3.98074000 |
| C | 4.78519100  | -0.44759100 | 5.20620400  |
| H | 5.16224900  | -0.48158800 | 6.23992500  |
| H | 4.84665000  | 0.58824500  | 4.84580000  |
| C | -2.39813200 | 0.03598600  | -1.43548000 |
| H | -2.38390700 | 1.11048800  | -1.63236700 |
| H | -3.42368200 | -0.32953400 | -1.53751600 |
| C | 5.64056100  | -1.36954300 | 4.35325300  |
| H | 6.69836900  | -1.16662100 | 4.57696700  |
| H | 5.42871100  | -2.41030800 | 4.61324400  |
| C | 5.91824800  | -0.07208000 | 2.37632200  |
| H | 6.97987800  | 0.05475900  | 2.63543800  |
| H | 5.34648800  | 0.79385500  | 2.73603800  |
| C | 2.56372000  | 0.05128400  | 5.79267600  |
| H | 2.65162700  | 1.02500600  | 5.29036600  |
| H | 2.82675600  | 0.16418300  | 6.85512700  |
| C | -0.25231000 | -4.42929600 | 0.45057400  |
| H | -1.23969600 | -4.48442100 | 0.92044800  |
| H | 0.38416000  | -5.20681400 | 0.87478300  |
| H | -0.38474300 | -4.59222600 | -0.62118600 |
| K | 2.66589800  | -0.89760100 | 2.51314800  |
| O | -0.01589600 | 1.73711200  | -0.32745800 |
| C | 0.73995900  | 2.71004200  | -0.55646800 |
| O | 1.75922700  | 3.08580000  | 0.07023700  |
| C | 2.22476400  | 2.27846400  | 1.71388900  |
| C | 3.57701300  | 2.68815600  | 2.10456300  |
| H | 2.10014000  | 1.28796600  | 1.31217400  |
| H | 1.40144800  | 2.70542200  | 2.27402700  |
| O | 3.40840400  | 1.83925400  | 3.18884100  |
| H | 4.34366100  | 2.34749900  | 1.38520100  |
| C | 3.79881600  | 4.15322100  | 2.44099000  |
| H | 3.81407300  | 4.76942100  | 1.53507400  |
| H | 3.00406500  | 4.51717800  | 3.10204100  |
| H | 4.75783700  | 4.27203200  | 2.95706700  |
| O | 0.43578100  | 3.52611900  | -1.58634300 |
| C | -0.69775400 | 3.20809400  | -2.38898100 |
| H | -1.61523300 | 3.25365900  | -1.79682200 |
| H | -0.72386000 | 3.96675500  | -3.17020200 |
| H | -0.59305800 | 2.21762100  | -2.83694600 |

IIK.log

SCF (wB97xd) = -2884.62764833  
E(SCF)+ZPE(0 K)= -2883.979874  
H(298 K)= -2883.934925  
G(298 K)= -2884.056033  
Lowest Frequency = 24.1560cm-1

|    |             |             |             |
|----|-------------|-------------|-------------|
| Co | -0.00794300 | -0.22443900 | -0.00791100 |
| O  | 0.02772400  | -0.09351300 | 1.88108800  |
| O  | 1.88573100  | -0.17984200 | -0.01538300 |
| O  | 0.69307700  | -0.45589400 | 4.37546000  |
| O  | -0.16168800 | -2.08945900 | -0.01498700 |
| O  | 4.43346900  | -0.24029600 | 0.49552500  |
| O  | 5.42641000  | -1.20196100 | 2.96815800  |

O 3.42512700 -0.88869700 5.19578700  
O 1.36699600 -2.77198000 1.49774700  
N -0.12979600 -0.32243600 -1.91191700  
N -1.91207600 -0.16004900 -0.04395500  
C 2.66879000 -0.18429700 -1.04704900  
C 4.08645800 -0.18989600 -0.81336400  
C -0.91234600 -0.51811800 2.66901700  
C -0.59286100 -0.73738800 4.05049900  
C -2.68633500 -0.46655500 0.93006400  
H -3.76118500 -0.50742900 0.73795600  
C 3.18015700 -0.15793500 -3.45859400  
H 2.81529200 -0.16081300 -4.48196000  
C 0.46837000 -2.97496700 0.68939800  
C -1.50175400 -0.55013300 -2.36422500  
H -1.68822700 -1.62868900 -2.34424300  
H -1.65094800 -0.18087200 -3.38277900  
C -3.21827600 -1.20153900 3.20568000  
H -4.23816300 -1.36388800 2.86806300  
C 4.98140900 -0.15510900 -1.86335600  
H 6.04842300 -0.15876700 -1.67086400  
C 2.23956000 -0.19194600 -2.39796600  
C -2.87109400 -1.43535300 4.51446900  
H -3.60397700 -1.79357600 5.22889200  
C 0.84722200 -0.29242500 -2.74261800  
H 0.61225400 -0.36402600 -3.80773700  
C 1.11004200 -0.55114900 5.72941100  
H 1.07012200 -1.59565900 6.06494900  
H 0.45339100 0.05351300 6.36801700  
C -2.25310300 -0.74787500 2.27388900  
C -1.54678300 -1.19597000 4.93774500  
H -1.28610000 -1.37748600 5.97447900  
C 5.80256100 -0.14430500 0.85709600  
H 6.25164800 0.74739500 0.40051100  
H 6.34379700 -1.03534100 0.51329500  
C 4.52803400 -0.12962900 -3.19997900  
H 5.24960100 -0.10227500 -4.00887600  
C 4.74622400 -0.37007800 5.19492100  
H 5.13505500 -0.34069500 6.22479600  
H 4.72887300 0.65094600 4.78836800  
C -2.42305900 0.14870200 -1.37419800  
H -2.37514000 1.23245100 -1.51385900  
H -3.45994000 -0.17816300 -1.49054200  
C 5.65034400 -1.26608800 4.36618100  
H 6.69583000 -1.00450600 4.58830600  
H 5.49170400 -2.31089200 4.64781400  
C 5.88697100 -0.00425500 2.35928500  
H 6.93936300 0.17397900 2.62685300  
H 5.27505800 0.85048900 2.68809900  
C 2.51558800 -0.00561000 5.82772400  
H 2.56729100 0.97690000 5.33667800  
H 2.77154200 0.10225900 6.89271900  
C -0.05560800 -4.37910800 0.43509200  
H -1.00564800 -4.49792200 0.96605200  
H 0.65247300 -5.11946300 0.80905800  
H -0.24545000 -4.53979800 -0.62815400  
K 2.65950100 -0.62867100 2.52122500  
O -0.04546800 1.83651700 -0.20841600  
C 0.69198700 2.80522100 -0.37291400  
O 1.59095000 3.26692100 0.43997500  
C 1.76602000 2.69606500 1.77654300  
C 3.25935900 2.56006900 2.10896400  
H 1.26446600 1.73111000 1.81348200  
H 1.27905300 3.39584700 2.46476700

O 3.37766900 1.91658300 3.30746000  
H 3.69272900 1.97537800 1.26202000  
C 3.94709100 3.93569700 2.07929400  
H 3.84455800 4.43674400 1.10839200  
H 3.51964800 4.58413800 2.85576100  
H 5.01489600 3.81063400 2.29113800  
O 0.63688500 3.57196500 -1.44639900  
C -0.33492000 3.24577100 -2.44784300  
H -1.34195700 3.34623300 -2.03861100  
H -0.17790300 3.97055400 -3.24350600  
H -0.17657900 2.23373900 -2.82009300

IIK.log

SCF (wB97xd) = -2884.60632550  
E(SCF)+ZPE(0 K)= -2883.960180  
H(298 K)= -2883.914229  
G(298 K)= -2884.042542  
Lowest Frequency = 7.4794cm-1

Co -0.42983300 -0.86665400 -0.33524200  
O -0.50706900 -0.24759500 1.44085100  
O 1.32629800 -0.21908400 -0.48023100  
O 0.18947300 0.04958800 3.96764200  
O -0.12627700 -2.64019000 0.06194500  
O 3.83282400 0.40386000 -0.02179500  
O 4.92865300 -0.18150500 2.54380100  
O 2.94839800 0.13164900 4.74833600  
O 1.56284400 -2.41393700 1.54186700  
N -0.52086300 -1.28986200 -2.19017000  
N -2.31262800 -1.16146000 -0.34808200  
C 2.15394800 -0.36328100 -1.47469300  
C 3.52961400 -0.01203500 -1.27459900  
C -1.33294300 -0.70360800 2.34208900  
C -0.99378100 -0.56508600 3.72771200  
C -3.03945200 -1.39266000 0.68450100  
H -4.08605100 -1.66289400 0.52758400  
C 2.73923800 -0.91715200 -3.80449400  
H 2.42059600 -1.27687200 -4.77850100  
C 0.76021200 -3.08345200 0.91063600  
C -1.81002000 -1.87376900 -2.56738600  
H -1.76832500 -2.94646300 -2.35066900  
H -2.01401400 -1.73167500 -3.63159800  
C -3.43992600 -1.76177100 3.06958900  
H -4.39138400 -2.21057500 2.79941600  
C 4.44166600 -0.10891100 -2.30829800  
H 5.47893100 0.16135900 -2.14765900  
C 1.78599900 -0.82825100 -2.76020200  
C -3.06918300 -1.64465600 4.38704000  
H -3.71425200 -2.00484700 5.18063500  
C 0.44272900 -1.24495600 -3.04105800  
H 0.23383700 -1.56936500 -4.06297400  
C 0.62602900 0.20079200 5.31233000  
H 0.74601200 -0.78498700 5.77960800  
H -0.10941200 0.78128800 5.88354000  
C -2.58121900 -1.30270200 2.04283600  
C -1.84004900 -1.03843300 4.71388500  
H -1.56558100 -0.94620900 5.75826900  
C 5.19502000 0.63189000 0.31766300  
H 5.59270300 1.47418600 -0.26260900  
H 5.78718600 -0.26637100 0.10152500  
C 4.04693700 -0.56179400 -3.58373500  
H 4.78288900 -0.62970400 -4.37707000

C 4.20130500 0.79288200 4.69205500  
 H 4.58653500 0.95497900 5.71075800  
 H 4.07240100 1.76629700 4.19877400  
 C -2.86607400 -1.21159100 -1.70051700  
 H -3.04236700 -0.18519500 -2.03883900  
 H -3.81226300 -1.75887800 -1.72427000  
 C 5.19158500 -0.07029800 3.93124300  
 H 6.20247300 0.33358600 4.09073400  
 H 5.16439300 -1.09052100 4.32426400  
 C 5.26623300 0.97122200 1.78752600  
 H 6.29470100 1.28766000 2.01657100  
 H 4.57282500 1.79633300 2.01186300  
 C 1.93671700 0.94938500 5.30527300  
 H 1.84129100 1.86705700 4.70717000  
 H 2.18806300 1.21453300 6.34318800  
 C 0.67359100 -4.59068100 1.06941200  
 H 1.58167700 -4.96684400 1.54132300  
 H 0.51571100 -5.07907800 0.10602200  
 H -0.18289100 -4.82461400 1.70946400  
 K 2.09208000 0.28691000 2.05737600  
 O 6.27397000 6.08406000 2.46495300  
 C 5.42741600 6.42155700 3.26205300  
 O 4.29435300 5.79600500 3.51134900  
 C 4.03224700 4.58045500 2.76589300  
 C 2.70988400 3.95068900 3.22720600  
 H 4.85829200 3.88473900 2.93938700  
 H 3.98647500 4.82431900 1.69823400  
 H 2.81185800 3.83226000 4.33826500  
 C 1.54168700 4.92750400 3.00807900  
 H 1.67990000 5.87705500 3.53940700  
 H 1.43053400 5.13757600 1.93607600  
 H 0.61408700 4.46352900 3.36100800  
 O 5.49663700 7.50142800 4.03829000  
 C 6.67373900 8.30324300 3.89901800  
 H 6.75680100 8.68699700 2.87999700  
 H 6.54871900 9.12403900 4.60271700  
 H 7.56395800 7.72212300 4.14891400  
 O 2.54462900 2.76038000 2.58914400

IVK.log

SCF (wB97xd) = -3073.18985366  
 E(SCF)+ZPE(0 K)= -3072.530660  
 H(298 K)= -3072.480760  
 G(298 K)= -3072.618289  
 Lowest Frequency = 9.0014cm-1

Co -0.24180700 -0.56758600 -0.11224300  
 O -0.23012800 -0.11771600 1.71613800  
 O 1.57978400 -0.14082100 -0.21863300  
 O 0.51939400 -0.20555500 4.24888500  
 O -0.16974900 -2.39413900 0.10562200  
 O 4.14538600 0.19396900 0.23444700  
 O 5.12113700 -1.00137300 2.60836400  
 O 3.25239700 -0.73366600 4.90761900  
 O 1.54402400 -2.51557700 1.57036100  
 N -0.39519100 -0.76410900 -1.99804300  
 N -2.14623000 -0.60354600 -0.12515000  
 C 2.36403900 -0.18742600 -1.25384600  
 C 3.76981000 0.01342200 -1.05605300  
 C -1.10634900 -0.54659300 2.58243800  
 C -0.74384400 -0.60856700 3.96724000  
 C -2.89628500 -0.82557100 0.89299300

H -3.97034300 -0.93417400 0.72721100  
 C 2.84097600 -0.40610300 -3.66371100  
 H 2.46760000 -0.57976400 -4.66874000  
 C 0.66025000 -3.01984300 0.89606300  
 C -1.74189600 -1.16903500 -2.40391700  
 H -1.81894900 -2.25390900 -2.27548700  
 H -1.93521700 -0.91757500 -3.44977800  
 C -3.34086700 -1.36474200 3.23626400  
 H -4.34774800 -1.64317000 2.93896000  
 C 4.64278100 0.01437100 -2.12670500  
 H 5.70268400 0.17259000 -1.96408600  
 C 1.92617000 -0.41105700 -2.58198100  
 C -2.95228700 -1.43974800 4.55164000  
 H -3.63963400 -1.78425600 5.31618400  
 C 0.54775600 -0.67844100 -2.86920800  
 H 0.28653200 -0.83918200 -3.91750500  
 C 0.99482900 -0.33503200 5.58260000  
 H 0.93635400 -1.38430000 5.89879900  
 H 0.38867600 0.27848000 6.26093600  
 C -2.42837600 -0.92911900 2.24676400  
 C -1.64660200 -1.05591500 4.91512500  
 H -1.35830600 -1.11559200 5.95805200  
 C 5.53133400 0.13774600 0.55627600  
 H 6.05432200 0.99947100 0.12389300  
 H 5.96310600 -0.78866800 0.15721300  
 C 4.17896800 -0.19315200 -3.44191300  
 H 4.88546100 -0.18881500 -4.26433500  
 C 4.61044900 -0.32768300 4.92526300  
 H 5.02209600 -0.43567200 5.94067100  
 H 4.67275300 0.72648000 4.62419800  
 C -2.70887600 -0.46609100 -1.46824400  
 H -2.76213900 0.59976400 -1.71342000  
 H -3.71369900 -0.89303600 -1.52499500  
 C 5.41132500 -1.20304400 3.97891700  
 H 6.48182400 -1.03144400 4.16682500  
 H 5.19251800 -2.25548600 4.18088100  
 C 5.66705200 0.18897000 2.05840800  
 H 6.73723400 0.26486500 2.30305600  
 H 5.14063500 1.07458400 2.44743700  
 C 2.42160200 0.15342900 5.63090200  
 H 2.49244700 1.15966200 5.19344900  
 H 2.73416100 0.19787800 6.68492700  
 C 0.38485700 -4.51264500 0.92128200  
 H 1.24843700 -5.04238300 1.32435100  
 H 0.14103400 -4.88570300 -0.07511400  
 H -0.47775000 -4.69549000 1.56979100  
 K 2.41301100 0.09926700 2.32768800  
 O 7.91918000 4.28983400 4.27480100  
 C 7.06933500 4.72199800 5.02110200  
 O 5.78235900 4.43995700 4.98763400  
 C 5.33577100 3.51771700 3.96208500  
 C 3.82459000 3.27728800 4.10281900  
 H 5.88060400 2.57711700 4.08586900  
 H 5.57034700 3.93843700 2.97985800  
 H 3.67497300 2.97092200 5.17026800  
 C 3.05433000 4.59810000 3.92704600  
 H 3.35376500 5.35925800 4.65740800  
 H 3.22339400 4.99922900 2.91905500  
 H 1.98144400 4.40932900 4.04137600  
 O 7.29306200 5.57050600 6.02298600  
 C 8.65084800 5.98317200 6.20743300  
 H 9.01659000 6.50325900 5.31952600  
 H 8.63382600 6.65878600 7.06052500



H 9.28713500 5.12125400 6.41926100  
O 3.43923700 2.30754700 3.22607500  
C 3.47319100 3.06189600 0.73923200  
O 2.33742200 2.86261700 0.60392500  
O 4.60578200 3.32067800 0.69895100

TS2K.log

SCF (wB97xd) = -3073.18976408  
E(SCF)+ZPE(0 K)= -3072.530789  
H(298 K)= -3072.481691  
G(298 K)= -3072.616858  
Lowest Frequency = -108.9061cm-1

Co -0.24646800 -0.57804300 -0.11869100  
O -0.23141200 -0.12277000 1.70828600  
O 1.57519500 -0.15340600 -0.22922800  
O 0.52227100 -0.19409300 4.23984200  
O -0.17117100 -2.40402400 0.10300900  
O 4.14211200 0.17865100 0.21769400  
O 5.13056400 -0.98626700 2.59678600  
O 3.25894200 -0.69688700 4.88939100  
O 1.53936400 -2.51937400 1.57209200  
N -0.40409200 -0.77795400 -2.00363800  
N -2.15084100 -0.61675700 -0.12689100  
C 2.35671100 -0.19876600 -1.26665900  
C 3.76295400 0.00241400 -1.07196900  
C -1.10500400 -0.54982700 2.57799100  
C -0.73994400 -0.60416500 3.96231400  
C -2.89791600 -0.83860100 0.89345700  
H -3.97211000 -0.95011900 0.73053200  
C 2.82697900 -0.41468800 -3.67812500  
H 2.45094000 -0.58759600 -4.68228200  
C 0.65847700 -3.02665800 0.89611200  
C -1.75109300 -1.18553000 -2.40575200  
H -1.82619200 -2.27033900 -2.27558800  
H -1.94726300 -0.93590200 -3.45153100  
C -3.33539600 -1.37258300 3.23946600  
H -4.34198200 -1.65540500 2.94534100  
C 4.63267700 0.00507600 -2.14535300  
H 5.69306700 0.16306400 -1.98608200  
C 1.91527600 -0.42169900 -2.59367900  
C -2.94380200 -1.44156600 4.55430800  
H -3.62831200 -1.78583300 5.32148900  
C 0.53655400 -0.69096100 -2.87722000  
H 0.27287400 -0.85240800 -3.92479200  
C 1.00097400 -0.31626800 5.57279700  
H 0.95138600 -1.36491200 5.89237700  
H 0.39235000 0.29495400 6.25092200  
C -2.42654300 -0.93749500 2.24645400  
C -1.63889100 -1.05134000 4.91377800  
H -1.34840000 -1.10592600 5.95638000  
C 5.52990900 0.13509800 0.53147100  
H 6.04374200 0.99859400 0.09157200  
H 5.96658400 -0.79013800 0.13478300  
C 4.16524600 -0.20074700 -3.45962700  
H 4.86955100 -0.19472500 -4.28392600  
C 4.61525500 -0.28475000 4.90415800  
H 5.02571200 -0.37807700 5.92132500  
H 4.67491200 0.76593100 4.59076700  
C -2.71698200 -0.48266800 -1.46887200  
H -2.77256000 0.58269100 -1.71567800  
H -3.72125600 -0.91131200 -1.52244400

C 5.42087000 -1.16891000 3.96990000  
H 6.49035200 -0.99014300 4.15654100  
H 5.20623100 -2.21935400 4.18600600  
C 5.67580500 0.19740100 2.03207000  
H 6.74788800 0.27264900 2.26847700  
H 5.15452100 1.08763800 2.41600600  
C 2.42425300 0.18294600 5.61595100  
H 2.48329400 1.19098600 5.18128800  
H 2.74086500 0.23118000 6.66846000  
C 0.38704200 -4.52014100 0.92219600  
H 1.24958200 -5.04685000 1.33139100  
H 0.15056800 -4.89533000 -0.07518600  
H -0.47918700 -4.70446600 1.56541300  
K 2.41184200 0.09156400 2.31182900  
O 7.94001400 4.30971900 4.29197500  
C 7.08120400 4.71566900 5.04245100  
O 5.79476700 4.43294300 4.98412300  
C 5.36313500 3.54616700 3.92300600  
C 3.85097500 3.30230500 4.04428600  
H 5.90693500 2.60195800 4.02105000  
H 5.60888800 3.99978000 2.95859300  
H 3.69240600 2.96692200 5.09907500  
C 3.07904400 4.62464400 3.89543700  
H 3.37044100 5.36424800 4.65032300  
H 3.25723200 5.05724700 2.90228100  
H 2.00566900 4.43101500 3.99435600  
O 7.29094600 5.52997600 6.07479200  
C 8.64537800 5.93974400 6.28876100  
H 9.01940700 6.49067900 5.42322900  
H 8.61649800 6.58599500 7.16397700  
H 9.28176600 5.07280500 6.47855400  
O 3.46783700 2.34796300 3.14412500  
C 3.43407000 3.05668900 0.87127700  
O 2.29746600 2.85668100 0.70888000  
O 4.55896800 3.34222800 0.74949700

VK.log

SCF (wB97xd) = -3073.22363703  
E(SCF)+ZPE(0 K)= -3072.561140  
H(298 K)= -3072.513200  
G(298 K)= -3072.645914  
Lowest Frequency = -8.2277cm-1

Co -0.30239700 -0.79679100 -0.30620300  
O -0.35319500 -0.24596500 1.49229700  
O 1.50381100 -0.30043500 -0.39703600  
O 0.32788500 -0.08387500 4.04667200  
O -0.14907300 -2.60615600 0.00728700  
O 4.03879100 0.14702800 0.10955100  
O 5.01393200 -0.64418800 2.61442500  
O 3.06857700 -0.30039200 4.77630300  
O 1.50577300 -2.58489100 1.54115500  
N -0.39570900 -1.11730900 -2.18101700  
N -2.19792600 -0.94529900 -0.35104600  
C 2.32583800 -0.41250900 -1.39938300  
C 3.71782400 -0.15398800 -1.17294500  
C -1.22582400 -0.65957000 2.36933000  
C -0.89820800 -0.59471400 3.76296300  
C -2.95493700 -1.15362600 0.66463300  
H -4.01675200 -1.33620400 0.48576500  
C 2.88920300 -0.81906200 -3.76392500  
H 2.55539700 -1.08521400 -4.76261700

C 0.67371200 -3.15859400 0.85498700  
C -1.71494400 -1.60125100 -2.59321100  
H -1.74469800 -2.68181400 -2.41756900  
H -1.89698000 -1.40555800 -3.65285600  
C -3.42186400 -1.56918800 3.02953400  
H -4.40179400 -1.93037600 2.73118300  
C 4.62735000 -0.22135500 -2.21050800  
H 5.67711000 -0.02041500 -2.03001500  
C 1.93778600 -0.75708800 -2.71613900  
C -3.06335300 -1.52878100 4.35499600  
H -3.74700800 -1.86397500 5.12689300  
C 0.57437000 -1.07759600 -3.02503300  
H 0.35282600 -1.32693200 -4.06514900  
C 0.77013200 -0.09262300 5.39837100  
H 0.79245700 -1.12334200 5.77418900  
H 0.09260300 0.50258000 6.02305400  
C -2.51313900 -1.14515000 2.03195700  
C -1.79555700 -1.03462900 4.71923400  
H -1.53391800 -1.00221600 5.77028700  
C 5.40641200 0.29052100 0.46151200  
H 5.84576600 1.15392400 -0.05364700  
H 5.96055900 -0.61555700 0.18661200  
C 4.21336700 -0.55324300 -3.51686900  
H 4.94763300 -0.60003000 -4.31322500  
C 4.40160500 0.17006800 4.85722900  
H 4.75867400 0.12788000 5.89713900  
H 4.44613600 1.21441800 4.52228400  
C -2.73573100 -0.90507400 -1.71063000  
H -2.83860300 0.14353200 -2.00858500  
H -3.71592100 -1.38597100 -1.76601400  
C 5.29354500 -0.71055800 4.00198100  
H 6.34192600 -0.43946100 4.19193800  
H 5.15062900 -1.75707100 4.28334800  
C 5.48811300 0.51288400 1.95459400  
H 6.53762400 0.70731300 2.21783600  
H 4.89670600 1.39809200 2.23151600  
C 2.14720200 0.52319900 5.46694300  
H 2.14156300 1.52981400 5.02636300  
H 2.42846900 0.60552500 6.52711400  
C 0.46668700 -4.65980800 0.93687700  
H 1.34036300 -5.13074900 1.38816900  
H 0.27139800 -5.08548600 -0.04895000  
H -0.40642900 -4.85505800 1.56745600  
K 2.24406100 0.00483700 2.13599100  
O 8.11068600 4.48733500 3.86557400  
C 7.54300900 4.57082300 4.92926100  
O 6.24502600 4.40294300 5.13256100  
C 5.44494300 4.11983500 3.96871500  
C 4.01587700 3.93486100 4.48077400  
H 5.80715600 3.19992100 3.50079200  
H 5.52943600 4.94196500 3.25843600  
H 4.09236000 3.34115700 5.39947200  
C 3.31505100 5.24615900 4.80976400  
C 3.89486100 5.79498700 5.55800000  
H 3.21401700 5.86473100 3.91545300  
H 2.32275600 5.04640900 5.22363800  
O 8.11845200 4.84252800 6.09394200  
C 9.53602800 5.04798000 6.06332700  
H 9.78379900 5.89656100 5.42262300  
H 9.81864500 5.25570400 7.09333500  
H 10.04282300 4.15021200 5.70366900  
O 3.25074400 3.09587000 3.62053800  
C 2.98566100 3.47250200 2.29112100

O 2.19094600 2.69203400 1.73886600  
O 3.56438900 4.47314600 1.84500000

VIK.log

SCF (wB97xd) = -3266.36468376  
E(SCF)+ZPE(0 K)= -3265.612499  
H(298 K)= -3265.558632  
G(298 K)= -3265.702792  
Lowest Frequency = 9.7636cm-1

Co 0.25470900 -0.27274000 -0.38007300  
O 0.13967800 -0.01873800 1.50855400  
O 2.13950100 -0.28035600 -0.16718600  
O 0.50645000 0.02781300 4.08626000  
O 0.05713900 -2.17907800 -0.28252400  
O 4.60883200 -0.19646600 0.62799000  
O 5.24661100 -1.13615200 3.21006300  
O 3.08386000 -0.56233100 5.15617700  
O 1.28998100 -2.91421900 1.45287100  
N 0.33755100 -0.53888900 -2.26351600  
N -1.63753100 -0.21972500 -0.61971500  
C 3.02834300 -0.38165500 -1.09955700  
C 4.40958500 -0.33965800 -0.71163200  
C -0.92128400 -0.17538200 2.22737600  
C -0.77231500 -0.16979200 3.65732600  
C -2.51782600 -0.28834300 0.30703500  
H -3.57022700 -0.27781800 0.01597800  
C 3.80390400 -0.64582100 -3.42059400  
H 3.55598800 -0.76891900 -4.47159000  
C 0.50388200 -3.07768700 0.51726700  
C -0.97658600 -0.81160000 -2.84401400  
H -1.16259600 -1.88731600 -2.76228700  
H -1.01291700 -0.52186200 -3.89802200  
C -3.33726400 -0.49953300 2.59865300  
H -4.33161300 -0.61143300 2.17466400  
C 5.41870200 -0.43948200 -1.64866400  
H 6.45820500 -0.40723700 -1.34213800  
C 2.75203100 -0.54418800 -2.47944900  
C -3.15537600 -0.51992200 3.96014100  
H -3.99475000 -0.65609300 4.63302900  
C 1.40208400 -0.62993900 -2.97046400  
H 1.28528200 -0.81362000 -4.04165900  
C 0.76372600 -0.02617700 5.47984600  
H 0.56660800 -1.03821800 5.85715900  
H 0.12045300 0.68320000 6.01608800  
C -2.23811500 -0.33637700 1.72076900  
C -1.85776800 -0.35368400 4.48986700  
H -1.72846800 -0.37147000 5.56599100  
C 5.93841200 -0.22056400 1.11765000  
H 6.52356000 0.59756900 0.67694200  
H 6.41472700 -1.17656000 0.86338900  
C 5.11738800 -0.59158500 -3.01880300  
H 5.92439100 -0.66957400 -3.73896000  
C 4.43954800 -0.20356900 5.34768200  
H 4.68960100 -0.22955100 6.41920100  
H 4.60618600 0.82034200 4.98389700  
C -2.00356700 -0.05006600 -2.02040200  
H -1.95049700 1.01809400 -2.25689700  
H -3.02069500 -0.40176500 -2.21445500  
C 5.33673000 -1.19038600 4.62208200  
H 6.37483800 -1.01869700 4.94168500  
H 5.05565200 -2.20937300 4.90162800

|   |             |             |             |   |             |            |             |
|---|-------------|-------------|-------------|---|-------------|------------|-------------|
| C | 5.90242000  | -0.02937400 | 2.61526900  | H | 4.29368800  | 3.83519100 | 1.44673700  |
| H | 6.93837500  | 0.03742700  | 2.97797400  | H | 4.25677100  | 2.48873000 | 0.27876100  |
| H | 5.38051900  | 0.90636400  | 2.85106400  | O | 0.22398000  | 3.80601100 | -1.05832600 |
| C | 2.19778500  | 0.37227000  | 5.73436800  | C | -0.82951200 | 4.09186800 | -0.12603700 |
| H | 2.38583700  | 1.37103400  | 5.31917600  | H | -1.00848800 | 5.15865400 | -0.29171900 |
| H | 2.34809000  | 0.41789100  | 6.82341800  | C | -2.10644800 | 3.34624900 | -0.50929500 |
| C | -0.06373200 | -4.46068400 | 0.22875400  | H | -2.04733800 | 2.29825900 | -0.22560800 |
| H | -1.08776200 | -4.50607700 | 0.61403300  | H | -2.29559100 | 3.43387000 | -1.58383800 |
| H | 0.53127800  | -5.23046400 | 0.72222500  | C | -0.42862200 | 3.87473200 | 1.32511200  |
| H | -0.10561000 | -4.64721900 | -0.84668700 | H | 0.49270000  | 4.42201500 | 1.54209800  |
| K | 2.56443700  | -0.83027300 | 2.42597700  | H | -1.21683000 | 4.25829000 | 1.97922600  |
| O | 0.15122100  | 1.64987000  | -0.51905200 | H | -0.27267400 | 2.81387100 | 1.53105500  |
| C | 0.72135900  | 2.53318500  | -1.23259700 | O | -3.18155700 | 3.97341500 | 0.20876700  |
| O | 1.62909200  | 2.42115800  | -2.04182000 | C | -4.30501600 | 3.27570700 | 0.30399500  |
| C | 2.29704400  | 2.89551000  | 3.06444900  | O | -4.51532200 | 2.19799700 | -0.20179100 |
| C | 2.70259500  | 2.41699000  | 1.74384600  | O | -5.16186500 | 3.95949300 | 1.04931400  |
| H | 1.34181300  | 2.57511600  | 3.47676600  | C | -6.43768900 | 3.34358800 | 1.26571100  |
| H | 2.68856800  | 3.84100300  | 3.43662500  | H | -6.31515400 | 2.38876900 | 1.78104000  |
| O | 3.26786900  | 1.85458700  | 2.93932600  | H | -6.99208800 | 4.04246000 | 1.88861700  |
| H | 2.01998400  | 1.73850000  | 1.23392500  | H | -6.95223700 | 3.19015700 | 0.31515600  |
| C | 3.64105200  | 3.18364700  | 0.85785200  |   |             |            |             |
| H | 3.06827700  | 3.79585600  | 0.15429300  |   |             |            |             |

## Functional Screening

1\_prop\_Z\_b3lyp.log

SCF (B3LYP) = -2692.37070339  
 E(SCF)+ZPE(0 K)= -2691.819971  
 H(298 K)= -2691.779130  
 G(298 K)= -2691.893649  
 Lowest Frequency = 18.4880cm<sup>-1</sup>

|    |           |           |           |
|----|-----------|-----------|-----------|
| Co | 2.465382  | 6.369457  | 23.124233 |
| K  | 5.793452  | 7.544303  | 22.007584 |
| O  | 1.555813  | 6.146078  | 21.433872 |
| O  | 3.149596  | 8.070537  | 22.613047 |
| O  | 3.994588  | 5.585525  | 22.276993 |
| O  | 4.618429  | 10.109003 | 21.945662 |
| O  | 3.279972  | 6.416462  | 24.875614 |
| O  | 5.924161  | 5.081197  | 20.606731 |
| O  | 8.082598  | 6.885564  | 20.498484 |
| O  | 7.164346  | 9.663763  | 20.781051 |
| O  | 5.373928  | 7.228923  | 24.590069 |
| O  | 0.436771  | 8.109044  | 21.176343 |
| N  | 1.747427  | 4.669798  | 23.639503 |
| N  | 0.929141  | 7.107088  | 23.971983 |
| C  | 4.096947  | 4.349161  | 21.901042 |
| C  | 5.171140  | 4.007456  | 21.007479 |
| C  | 2.827260  | 9.195232  | 23.172859 |
| C  | 3.623337  | 10.350846 | 22.858760 |
| C  | 0.861046  | 7.019429  | 20.803982 |
| C  | 0.803505  | 8.326536  | 24.351045 |
| H  | -0.088550 | 8.596436  | 24.922118 |
| C  | 3.484723  | 1.955713  | 21.895781 |
| H  | 2.821892  | 1.168841  | 22.245025 |
| C  | 4.434238  | 6.816991  | 25.284213 |
| C  | 0.652818  | 4.811024  | 24.598831 |
| H  | 1.087807  | 4.911633  | 25.598813 |
| H  | -0.007647 | 3.938716  | 24.580434 |
| C  | 1.487670  | 10.661752 | 24.641061 |

|   |           |           |           |
|---|-----------|-----------|-----------|
| H | 0.643269  | 10.774143 | 25.315685 |
| C | 5.387968  | 2.699031  | 20.608459 |
| H | 6.211000  | 2.456309  | 19.946562 |
| C | 3.243489  | 3.287487  | 22.323711 |
| C | 2.301596  | 11.738555 | 24.354353 |
| H | 2.121939  | 12.708368 | 24.805732 |
| C | 2.138219  | 3.521020  | 23.216195 |
| H | 1.595346  | 2.636893  | 23.560980 |
| C | 5.469155  | 11.185280 | 21.555211 |
| H | 6.103635  | 11.485651 | 22.399062 |
| H | 4.872507  | 12.048413 | 21.235073 |
| C | 1.731611  | 9.388479  | 24.064541 |
| C | 3.376984  | 11.578954 | 23.450171 |
| H | 4.006165  | 12.432151 | 23.225015 |
| C | 7.052356  | 4.849545  | 19.764515 |
| H | 6.751626  | 4.302926  | 18.861913 |
| H | 7.805421  | 4.261457  | 20.304232 |
| C | 4.538473  | 1.660581  | 21.055810 |
| H | 4.723895  | 0.641985  | 20.732429 |
| C | 8.038556  | 9.241225  | 19.739509 |
| H | 8.729578  | 10.054455 | 19.471301 |
| H | 7.456502  | 8.988273  | 18.841626 |
| C | -0.089466 | 6.095013  | 24.233325 |
| H | -0.664371 | 5.943274  | 23.312706 |
| H | -0.770638 | 6.411175  | 25.029335 |
| C | 8.854823  | 8.052554  | 20.221051 |
| H | 9.625701  | 7.825726  | 19.470923 |
| H | 9.349968  | 8.307990  | 21.161816 |
| C | 7.615746  | 6.189891  | 19.346825 |
| H | 8.444117  | 6.016257  | 18.645262 |
| H | 6.839925  | 6.768138  | 18.826902 |
| C | 6.309432  | 10.729102 | 20.383603 |
| H | 5.658092  | 10.400076 | 19.560762 |
| H | 6.904878  | 11.584079 | 20.031534 |
| C | 4.569637  | 6.775579  | 26.804835 |
| H | 4.044108  | 7.639764  | 27.227153 |
| H | 5.620011  | 6.827432  | 27.097238 |

H 4.107382 5.874259 27.215115  
O 0.590313 6.560666 19.529918  
C -0.208392 7.419213 18.708263  
H 0.284116 8.383494 18.552904  
H -0.316451 6.897746 17.756122  
H -1.192231 7.588104 19.155727

RPO\_b3lyp.log

SCF (B3LYP) = -193.159176625  
E(SCF)+ZPE(0 K)= -193.073804  
H(298 K)= -193.068440  
G(298 K)= -193.100182  
Lowest Frequency = 212.7886cm-1

C -0.642510 -0.271618 0.021008  
C 0.825112 -0.266786 -0.002851  
O 0.087759 0.972054 -0.029333  
H -1.155111 -0.500866 -0.914273  
H 1.357649 -0.504628 -0.922102  
H 1.371620 -0.453031 0.920703  
C -1.425589 -0.545272 1.278122  
H -2.347867 0.045319 1.295208  
H -1.700902 -1.604726 1.325038  
H -0.835061 -0.298567 2.165586

TS1Co\_b3lyp.log

SCF (B3LYP) = -2885.52525199  
E(SCF)+ZPE(0 K)= -2884.887622  
H(298 K)= -2884.841857  
G(298 K)= -2884.965592  
Lowest Frequency = -459.2518cm-1

Co 5.119594 7.657517 21.276762  
O 4.562469 5.951873 21.945703  
O 3.628291 8.444583 22.174486  
O 3.631280 4.020234 23.440474  
O 6.340554 7.951076 22.737163  
O 1.337742 8.939825 23.300689  
O 0.487249 7.316559 25.462092  
O 1.449855 4.491727 25.239308  
O 5.178837 7.333148 24.580887  
N 5.713916 9.328222 20.563575  
N 6.587635 6.895668 20.325072  
C 3.159573 9.639397 21.985038  
C 1.903665 9.972128 22.604682  
C 5.349092 4.927946 22.110022  
C 4.889386 3.843889 22.935183  
C 7.129028 5.755518 20.567015  
H 8.038408 5.492494 20.020894  
C 3.209720 11.949035 21.108646  
H 3.726456 12.707110 20.526628  
C 6.194142 7.738933 24.002871  
C 7.039132 9.217563 19.953846  
H 7.788055 9.314644 20.747335  
H 7.201228 10.003740 19.210265  
C 7.411980 3.618798 21.734382  
H 8.379709 3.536112 21.247676  
C 1.353745 11.237260 22.480256  
H 0.413492 11.474563 22.964238  
C 3.798943 10.661939 21.225090  
C 6.960432 2.619884 22.571743

H 7.566828 1.742309 22.768385  
C 5.068851 10.440198 20.586372  
H 5.520983 11.302691 20.089762  
C 3.051394 2.991223 24.245133  
H 3.582313 2.925124 25.203567  
H 3.123150 2.024489 23.731633  
C 6.625406 4.775496 21.493984  
C 5.686313 2.734714 23.172539  
H 5.337335 1.940906 23.822496  
C 0.086377 9.145020 23.957502  
H -0.653055 9.542729 23.251004  
H 0.212615 9.858357 24.782004  
C 2.009306 12.236551 21.723644  
H 1.561794 13.220816 21.637111  
C 0.084336 4.868289 25.410153  
H -0.447040 4.095678 25.987216  
H -0.393045 4.958047 24.426216  
C 7.128025 7.824242 19.334630  
H 6.496759 7.775227 18.441231  
H 8.155808 7.564250 19.063748  
C 0.010617 6.178251 26.179685  
H -1.030400 6.343971 26.492652  
H 0.634600 6.110991 27.075508  
C -0.409977 7.808048 24.465651  
H -1.409563 7.954352 24.900139  
H -0.481763 7.101276 23.630123  
C 1.587627 3.312308 24.451246  
H 1.095790 3.457791 23.481573  
H 1.117925 2.459680 24.964852  
C 7.470137 8.013161 24.796097  
H 7.239765 8.147469 25.854690  
H 7.994276 8.890315 24.408673  
H 8.139477 7.151587 24.690430  
K 2.687074 6.579385 23.875051  
O 0.666706 5.630575 22.147946  
C 0.498415 5.000841 21.091743  
O 0.900725 5.289367 19.925214  
C 2.384869 6.767938 19.931683  
C 3.548538 6.212192 19.251916  
H 2.340792 6.749541 21.005012  
H 1.744281 7.449318 19.389948  
O 4.041250 7.493341 19.668171  
H 4.025755 5.382917 19.772929  
C 3.532748 6.036910 17.751295  
H 2.980896 5.128513 17.487870  
H 3.055296 6.892897 17.264285  
H 4.555887 5.942215 17.373728  
O -0.223743 3.827568 21.224307  
C -0.414594 3.028345 20.050597  
H 0.544520 2.705506 19.635338  
H -0.990454 2.160021 20.375387  
H -0.969164 3.578035 19.284716

TS1K\_b3lyp.log

SCF (B3LYP) = -2885.50316208  
E(SCF)+ZPE(0 K)= -2884.865514  
H(298 K)= -2884.819735  
G(298 K)= -2884.943403  
Lowest Frequency = -435.0757cm-1

Co 0.00742400 -0.25091800 -0.05020800  
O 0.05668000 -0.09285600 1.84950700

O 1.91072900 -0.27622400 -0.03203700  
O 0.70643200 -0.38601700 4.36799400  
O -0.18110500 -2.13719400 -0.02520200  
O 4.45857100 -0.19342100 0.50976600  
O 5.42651300 -1.27188200 2.98021800  
O 3.42878300 -0.88421800 5.19990900  
O 1.29584600 -2.87450500 1.52828400  
N -0.09266800 -0.39317500 -1.95417700  
N -1.90240300 -0.19595300 -0.09789300  
C 2.70151800 -0.18063400 -1.06023100  
C 4.11726000 -0.12798400 -0.81238200  
C -0.90749100 -0.43818000 2.65150600  
C -0.60236600 -0.61289800 4.04688200  
C -2.68204400 -0.43304100 0.89653400  
H -3.75625400 -0.48353200 0.70212400  
C 3.22480100 -0.03205400 -3.46981500  
H 2.86651300 -0.00907100 -4.49503700  
C 0.40583300 -3.04285200 0.69238500  
C -1.45367300 -0.69117700 -2.40412900  
H -1.59845100 -1.77435700 -2.33475400  
H -1.60646100 -0.37697700 -3.44108800  
C -3.25053800 -0.99850700 3.21094200  
H -4.27440500 -1.13601200 2.87473500  
C 5.02150200 -0.02185800 -1.85678900  
H 6.08567500 0.01205600 -1.65587800  
C 2.27535300 -0.14623300 -2.41943700  
C -2.91754500 -1.18094600 4.53666300  
H -3.66820700 -1.46976100 5.26436600  
C 0.89081500 -0.30147900 -2.77791700  
H 0.66956800 -0.36882200 -3.84617300  
C 1.11652400 -0.46582900 5.73537000  
H 1.03597600 -1.50120400 6.09059700  
H 0.47718400 0.17404300 6.35619300  
C -2.26362500 -0.63351800 2.25769300  
C -1.58155500 -0.98441900 4.95454300  
H -1.32935500 -1.13102000 5.99825700  
C 5.84287600 -0.19219100 0.86951600  
H 6.34600600 0.67759500 0.42931300  
H 6.32060400 -1.10755400 0.49778300  
C 4.57434600 0.03581700 -3.19692000  
H 5.30001300 0.12098600 -3.99848100  
C 4.78260300 -0.43074200 5.22757200  
H 5.15789200 -0.44353800 6.26249500  
H 4.82533700 0.59881300 4.85007400  
C -2.41442400 0.01557800 -1.45075300  
H -2.42015400 1.08976300 -1.65049700  
H -3.43371500 -0.36878800 -1.55174000  
C 5.65065300 -1.35717700 4.38828500  
H 6.70639900 -1.14247200 4.60927200  
H 5.44593100 -2.39725100 4.65788600  
C 5.95375500 -0.08895400 2.37565500  
H 7.01785600 0.01895000 2.63232300  
H 5.40214900 0.79101700 2.72847500  
C 2.54119900 0.03445300 5.83471900  
H 2.62708700 1.01554800 5.34951900  
H 2.79983400 0.13166300 6.89979600  
C -0.15581800 -4.43628000 0.42598600  
H -1.08116700 -4.55419200 1.00122300  
H 0.55617800 -5.19733600 0.75026000  
H -0.39973900 -4.56953800 -0.63040200  
K 2.69990700 -0.86146300 2.54164700  
O -0.06098500 1.76092400 -0.32340500  
C 0.69166200 2.74293000 -0.54209500

O 1.72025800 3.12062800 0.08028200  
C 2.17255500 2.32080900 1.75402000  
C 3.56363300 2.65567200 2.08855100  
H 1.96381900 1.33098000 1.39382400  
H 1.39780700 2.81806400 2.32480800  
O 3.41634800 1.84017000 3.21235700  
H 4.27696100 2.25995100 1.34481300  
C 3.87762700 4.11848600 2.37465400  
H 3.87510700 4.71193500 1.45252400  
H 3.13864900 4.53928400 3.06666400  
H 4.86805500 4.20138700 2.83696500  
O 0.37086600 3.58137100 -1.56352400  
C -0.76670500 3.25256000 -2.37542400  
H -1.67964800 3.24881700 -1.77509700  
H -0.81903000 4.03724100 -3.12990100  
H -0.63207400 2.28120500 -2.85417800

1\_prop\_Z\_m06.log

SCF (M06) = -2690.95248941  
E(SCF)+ZPE(0 K)= -2690.403122  
H(298 K)= -2690.362769  
G(298 K)= -2690.474913  
Lowest Frequency = 22.8394cm-1

Co 2.479317 6.354948 23.114870  
K 5.794711 7.514012 22.040774  
O 1.610203 6.108028 21.416865  
O 3.153286 8.048489 22.579303  
O 4.026251 5.573602 22.311015  
O 4.657836 10.068239 21.963905  
O 3.274890 6.430023 24.864461  
O 5.924007 5.092149 20.625857  
O 8.068677 6.870477 20.479383  
O 7.166561 9.611295 20.795276  
O 5.289726 7.411990 24.607103  
O 0.408130 8.011149 21.173128  
N 1.764305 4.665898 23.635878  
N 0.941600 7.089282 23.941143  
C 4.112622 4.353323 21.911156  
C 5.173707 4.021224 21.005285  
C 2.864374 9.155832 23.169212  
C 3.679697 10.300933 22.884147  
C 0.879371 6.949989 20.797691  
C 0.836765 8.302013 24.336541  
H -0.054454 8.578803 24.914242  
C 3.483680 1.972079 21.860824  
H 2.813403 1.183422 22.200321  
C 4.368347 6.954437 25.284607  
C 0.664984 4.811047 24.578930  
H 1.088105 4.920254 25.586398  
H 0.010641 3.930846 24.563663  
C 1.568013 10.607867 24.682603  
H 0.727045 10.716632 25.366487  
C 5.375662 2.724662 20.577566  
H 6.193519 2.490612 19.900611  
C 3.256182 3.293140 22.313780  
C 2.400866 11.671076 24.424204  
H 2.245671 12.632905 24.905036  
C 2.155061 3.522897 23.206158  
H 1.606933 2.633774 23.544202  
C 5.512104 11.134267 21.598097  
H 6.153318 11.414615 22.448866

|   |           |           |           |
|---|-----------|-----------|-----------|
| H | 4.925941  | 12.016281 | 21.298321 |
| C | 1.781649  | 9.350661  | 24.070974 |
| C | 3.463595  | 11.512098 | 23.511148 |
| H | 4.112775  | 12.359460 | 23.305796 |
| C | 6.990319  | 4.892316  | 19.718614 |
| H | 6.635932  | 4.380085  | 18.810987 |
| H | 7.776189  | 4.278056  | 20.185400 |
| C | 4.525181  | 1.685552  | 21.009901 |
| H | 4.699886  | 0.670637  | 20.663726 |
| C | 8.040272  | 9.218714  | 19.758222 |
| H | 8.737150  | 10.037931 | 19.511823 |
| H | 7.464041  | 8.996981  | 18.842618 |
| C | -0.073090 | 6.081598  | 24.195056 |
| H | -0.639378 | 5.920852  | 23.266541 |
| H | -0.769535 | 6.407124  | 24.977580 |
| C | 8.843872  | 8.021972  | 20.208649 |
| H | 9.605663  | 7.797748  | 19.443642 |
| H | 9.360854  | 8.262325  | 21.144779 |
| C | 7.527850  | 6.243564  | 19.335702 |
| H | 8.303369  | 6.114760  | 18.562547 |
| H | 6.712734  | 6.847655  | 18.900901 |
| C | 6.342368  | 10.694856 | 20.425033 |
| H | 5.685770  | 10.401171 | 19.587941 |
| H | 6.955744  | 11.548241 | 20.090495 |
| C | 4.438802  | 7.008610  | 26.798506 |
| H | 3.817219  | 7.845214  | 27.141719 |
| H | 5.465247  | 7.175862  | 27.133961 |
| H | 4.036160  | 6.096410  | 27.248007 |
| O | 0.629729  | 6.489632  | 19.529793 |
| C | -0.196724 | 7.310391  | 18.721074 |
| H | 0.253363  | 8.297135  | 18.564707 |
| H | -0.292266 | 6.794332  | 17.763335 |
| H | -1.188012 | 7.442768  | 19.168925 |

RPO\_m06.log

SCF (M06) = -193.014664366  
E(SCF)+ZPE(0 K)= -192.929473  
H(298 K)= -192.924126  
G(298 K)= -192.955836  
Lowest Frequency = 203.5281cm<sup>-1</sup>

|   |           |           |           |
|---|-----------|-----------|-----------|
| C | -0.644677 | -0.270011 | 0.017470  |
| C | 0.814364  | -0.262907 | 0.001549  |
| O | 0.081010  | 0.953102  | -0.022588 |
| H | -1.153706 | -0.500027 | -0.922493 |
| H | 1.355159  | -0.498174 | -0.915625 |
| H | 1.353230  | -0.458011 | 0.930980  |
| C | -1.418064 | -0.543481 | 1.270050  |
| H | -2.340506 | 0.047248  | 1.298672  |
| H | -1.694238 | -1.602348 | 1.326828  |
| H | -0.817471 | -0.293512 | 2.152264  |

TS1Co\_m06.log

SCF (M06) = -2883.96132962  
E(SCF)+ZPE(0 K)= -2883.325530  
H(298 K)= -2883.280522  
G(298 K)= -2883.401830  
Lowest Frequency = -479.4881cm<sup>-1</sup>

|    |          |          |           |
|----|----------|----------|-----------|
| Co | 5.172040 | 7.655785 | 21.325300 |
| O  | 4.650047 | 5.962612 | 22.030275 |

|   |           |           |           |
|---|-----------|-----------|-----------|
| O | 3.692649  | 8.437347  | 22.237572 |
| O | 3.786932  | 4.069927  | 23.591123 |
| O | 6.413162  | 7.960923  | 22.757327 |
| O | 1.312242  | 8.815646  | 23.181178 |
| O | 0.420725  | 7.235637  | 25.330381 |
| O | 1.514205  | 4.471547  | 25.242658 |
| O | 5.304042  | 7.304091  | 24.610355 |
| N | 5.733065  | 9.315673  | 20.584787 |
| N | 6.626674  | 6.902420  | 20.362045 |
| C | 3.157144  | 9.574264  | 21.953014 |
| C | 1.852896  | 9.849662  | 22.484003 |
| C | 5.457668  | 4.973332  | 22.219673 |
| C | 5.037582  | 3.911291  | 23.088026 |
| C | 7.191286  | 5.782805  | 20.629909 |
| H | 8.102683  | 5.520960  | 20.077418 |
| C | 3.106784  | 11.830299 | 20.963770 |
| H | 3.605603  | 12.589963 | 20.363408 |
| C | 6.311631  | 7.668419  | 24.006330 |
| C | 7.050855  | 9.212153  | 19.975164 |
| H | 7.805490  | 9.314707  | 20.766573 |
| H | 7.207362  | 10.003845 | 19.232398 |
| C | 7.543842  | 3.704415  | 21.869339 |
| H | 8.508968  | 3.628969  | 21.370238 |
| C | 1.238853  | 11.069375 | 22.276393 |
| H | 0.258374  | 11.268524 | 22.701270 |
| C | 3.759508  | 10.590725 | 21.164275 |
| C | 7.133117  | 2.733411  | 22.751517 |
| H | 7.766804  | 1.880298  | 22.977465 |
| C | 5.049826  | 10.400489 | 20.564523 |
| H | 5.478330  | 11.265870 | 20.042571 |
| C | 3.214225  | 3.032854  | 24.367907 |
| H | 3.697680  | 2.990408  | 25.356769 |
| H | 3.352209  | 2.061098  | 23.870103 |
| C | 6.726017  | 4.825965  | 21.594770 |
| C | 5.866023  | 2.839640  | 23.360170 |
| H | 5.544891  | 2.063109  | 24.049883 |
| C | 0.025688  | 8.977082  | 23.750722 |
| H | -0.693447 | 9.314498  | 22.988485 |
| H | 0.063799  | 9.729506  | 24.554480 |
| C | 1.869474  | 12.072727 | 21.511758 |
| H | 1.369035  | 13.025121 | 21.360318 |
| C | 0.137606  | 4.791585  | 25.307969 |
| H | -0.407649 | 4.002700  | 25.855570 |
| H | -0.271939 | 4.845321  | 24.284156 |
| C | 7.139994  | 7.825354  | 19.361734 |
| H | 6.494349  | 7.767973  | 18.474790 |
| H | 8.165771  | 7.566817  | 19.071873 |
| C | -0.042787 | 6.101239  | 26.038978 |
| H | -1.109857 | 6.224864  | 26.289136 |
| H | 0.524229  | 6.075457  | 26.977398 |
| C | -0.432567 | 7.645793  | 24.278645 |
| H | -1.465979 | 7.755287  | 24.649100 |
| H | -0.424396 | 6.906528  | 23.461021 |
| C | 1.739552  | 3.297526  | 24.491762 |
| H | 1.299447  | 3.415831  | 23.487377 |
| H | 1.265836  | 2.431262  | 24.985389 |
| C | 7.639969  | 7.772410  | 24.731003 |
| H | 8.213677  | 6.860900  | 24.518793 |
| H | 7.488978  | 7.844417  | 25.810932 |
| H | 8.228118  | 8.621379  | 24.371324 |
| K | 2.798516  | 6.595854  | 23.945595 |
| O | 0.977319  | 5.534616  | 22.234825 |
| C | 0.510091  | 5.152074  | 21.158954 |

O 0.774005 5.558354 19.995291  
 C 2.359573 6.895456 19.992856  
 C 3.500307 6.213294 19.406523  
 H 2.279506 6.960033 21.070756  
 H 1.800983 7.589548 19.372206  
 O 4.080589 7.463008 19.740398  
 H 3.884958 5.379435 20.005472  
 C 3.518509 5.933557 17.930754  
 H 2.903730 5.056026 17.699853  
 H 3.131108 6.793402 17.371116  
 H 4.544731 5.733362 17.600080  
 O -0.425357 4.150078 21.262124  
 C -0.994743 3.653682 20.061192  
 H -0.228887 3.229637 19.402259  
 H -1.696591 2.870763 20.357994  
 H -1.530311 4.440155 19.517966

TS1K\_m06.log

SCF (M06) = -2883.93928183  
 E(SCF)+ZPE(0 K)= -2883.303644  
 H(298 K)= -2883.258562  
 G(298 K)= -2883.378609  
 Lowest Frequency = -477.3080cm-1

Co 0.01908800 -0.26064700 -0.05235800  
 O 0.06953200 -0.08213200 1.84215500  
 O 1.91880300 -0.32925700 -0.02812100  
 O 0.72676100 -0.40578600 4.34525100  
 O -0.19227100 -2.13273800 -0.01587600  
 O 4.45399700 -0.20554500 0.51609100  
 O 5.42815700 -1.23577100 2.97086100  
 O 3.43308800 -0.86883800 5.16493000  
 O 1.17871700 -2.86049300 1.62632600  
 N -0.08360400 -0.40758100 -1.94625400  
 N -1.87965100 -0.18385700 -0.09949700  
 C 2.70272800 -0.19532900 -1.04593900  
 C 4.11352000 -0.11794800 -0.79646400  
 C -0.87803400 -0.45725500 2.63460100  
 C -0.56927300 -0.65093700 4.02259300  
 C -2.65104000 -0.44195800 0.89222100  
 H -3.73033900 -0.49201500 0.70057600  
 C 3.22489800 0.00987800 -3.44556500  
 H 2.86369300 0.04549400 -4.47228000  
 C 0.31629800 -3.02191200 0.77102200  
 C -1.44329100 -0.68035500 -2.39401900  
 H -1.61040500 -1.76373500 -2.32967900  
 H -1.58671300 -0.36434500 -3.43506000  
 C -3.20554700 -1.06329100 3.18859000  
 H -4.22996100 -1.20873900 2.84860300  
 C 5.01230300 0.02630600 -1.83541300  
 H 6.07872700 0.07587600 -1.63259700  
 C 2.28052400 -0.13998900 -2.40121100  
 C -2.86843400 -1.26534900 4.50537700  
 H -3.61336600 -1.58028200 5.23074800  
 C 0.90118000 -0.30391300 -2.76187000  
 H 0.68172500 -0.35726100 -3.83632100  
 C 1.13151100 -0.49652200 5.70114300  
 H 1.06566000 -1.54028700 6.04699900  
 H 0.47893900 0.12341000 6.33455100  
 C -2.22867100 -0.66715200 2.24428800  
 C -1.53788800 -1.05428900 4.92110000  
 H -1.27990500 -1.21575800 5.96460200

C 5.82761800 -0.16913700 0.86776600  
 H 6.31175500 0.71625800 0.42626000  
 H 6.33210100 -1.07168100 0.48823100  
 C 4.56817800 0.09942800 -3.17170900  
 H 5.29416400 0.21399600 -3.97167600  
 C 4.76321600 -0.38181800 5.18289800  
 H 5.13908000 -0.35430300 6.22057600  
 H 4.77727300 0.64574700 4.77971800  
 C -2.38424200 0.04111500 -1.44534500  
 H -2.36828300 1.12000400 -1.64368000  
 H -3.41615900 -0.31652400 -1.54423000  
 C 5.64928400 -1.29682700 4.36887900  
 H 6.70321000 -1.05960400 4.59144500  
 H 5.46776600 -2.33817700 4.66093600  
 C 5.94449400 -0.06481100 2.36396400  
 H 7.01163900 0.05381700 2.61792600  
 H 5.39036400 0.82159700 2.71593000  
 C 2.54011500 0.01885100 5.80712300  
 H 2.60819600 1.01232800 5.33300500  
 H 2.80165000 0.11594300 6.87481200  
 C -0.32033600 -4.38035600 0.55821400  
 H -1.28252700 -4.39298200 1.08501400  
 H 0.31422500 -5.16806100 0.97110200  
 H -0.52138100 -4.56727500 -0.50005400  
 K 2.68707400 -0.88862000 2.51857900  
 O -0.01546300 1.74837600 -0.34494200  
 C 0.74401700 2.71663000 -0.56483400  
 O 1.76762900 3.08509400 0.05571100  
 C 2.19720300 2.26886000 1.72479100  
 C 3.56840700 2.62339700 2.08594000  
 H 2.01389900 1.27569500 1.34149500  
 H 1.39795300 2.74738400 2.28735700  
 O 3.41035500 1.80369400 3.18701800  
 H 4.30348400 2.24619300 1.33963100  
 C 3.84359100 4.08010500 2.38692400  
 H 3.84879700 4.68472100 1.47075900  
 H 3.07598800 4.47532400 3.06612400  
 H 4.82018700 4.18340400 2.87597900  
 O 0.43824500 3.54644300 -1.58870300  
 C -0.69019800 3.23834400 -2.39549900  
 H -1.60705200 3.21795700 -1.79659400  
 H -0.75356400 4.03602700 -3.13710100  
 H -0.56153800 2.27624100 -2.90368000

1\_prop\_Z\_mn15.log

SCF (MN15) = -2689.401685  
 E(SCF)+ZPE(0 K)= -2689.361932  
 H(298 K)= -2689.360988  
 G(298 K)= -2689.474129  
 Lowest Frequency = 19.5462cm-1

Co 2.48415600 6.33204600 23.13475700  
 K 5.76222400 7.51203200 22.00931900  
 O 1.63878500 6.01907800 21.43839900  
 O 3.13010800 8.02400500 22.54848500  
 O 4.06294900 5.54517600 22.38365800  
 O 4.67495100 10.05192400 21.97518300  
 O 3.22550300 6.49402800 24.90084500  
 O 5.91380500 5.09375300 20.60955300  
 O 8.04941200 6.86712300 20.46772900  
 O 7.17809800 9.60234200 20.79937700  
 O 5.22970000 7.48893300 24.58434700

O 0.41816200 7.91956700 21.19487300  
N 1.79741600 4.65176000 23.68118100  
N 0.93498400 7.06109700 23.91131800  
C 4.11598800 4.33751700 21.92049600  
C 5.14970800 4.02192000 20.97464700  
C 2.87092800 9.12716900 23.17533600  
C 3.70489000 10.26808300 22.91366800  
C 0.90490100 6.86131100 20.80893000  
C 0.83042000 8.27005700 24.32068800  
H -0.07112800 8.54349900 24.87946200  
C 3.43931800 1.96723700 21.80011200  
H 2.76181800 1.18108000 22.12799600  
C 4.30911700 7.06898700 25.29411100  
C 0.69734300 4.81549100 24.62142300  
H 1.11936700 5.02132700 25.61205300  
H 0.07368500 3.91593300 24.66529500  
C 1.60352800 10.56271500 24.73667100  
H 0.76683200 10.66547700 25.42526800  
C 5.32176900 2.73396900 20.49912800  
H 6.12153000 2.51088000 19.79861400  
C 3.24786600 3.28016200 22.29999200  
C 2.45499300 11.62171300 24.50207300  
H 2.31819700 12.57242600 25.00816000  
C 2.16640900 3.50840000 23.22842200  
H 1.61473200 2.62507700 23.56846600  
C 5.52543300 11.12696000 21.61835600  
H 6.16840700 11.39829500 22.46780500  
H 4.93321500 12.00604100 21.32876800  
C 1.79777500 9.31681700 24.08792700  
C 3.51169600 11.46868700 23.57450000  
H 4.17227500 12.30970800 23.38441700  
C 6.95981300 4.90003700 19.67431500  
H 6.57877500 4.41696000 18.76388300  
H 7.74526400 4.26781900 20.11176200  
C 4.46098400 1.69114200 20.91576600  
H 4.61138100 0.68653400 20.53255900  
C 8.07159600 9.22284900 19.77087400  
H 8.77799900 10.03975800 19.55584300  
H 7.51205900 9.01569500 18.84434600  
C -0.07299400 6.03930700 24.13604700  
H -0.55965800 5.81991300 23.17682400  
H -0.82533700 6.37375300 24.85884900  
C 8.85738200 8.00446900 20.22222500  
H 9.62035700 7.77157200 19.46373900  
H 9.36247600 8.22951200 21.16628500  
C 7.51057900 6.26025800 19.30955100  
H 8.29021300 6.13633900 18.54259800  
H 6.70205900 6.87323200 18.88252000  
C 6.36149500 10.69728700 20.43519400  
H 5.70632000 10.41563900 19.59620500  
H 6.98231400 11.54871100 20.11707200  
C 4.37018200 7.23971200 26.80575000  
H 3.76256800 8.11262400 27.07380400  
H 5.39843400 7.41406200 27.12919500  
H 3.94971900 6.37005200 27.31677600  
O 0.66972600 6.41983300 19.53668600  
C -0.16355900 7.24674000 18.73343300  
H 0.27929500 8.23888900 18.60173400  
H -0.24752200 6.74610800 17.76767600  
H -1.15540200 7.35861000 19.18268700

RPO\_mn15.log

SCF (MN15) = -192.825578  
E(SCF)+ZPE(0 K)= -192.821175  
H(298 K)= -192.820231  
G(298 K)= -192.851937  
Lowest Frequency = 213.9918cm-1

C -0.64820600 -0.26895100 0.01377100  
C 0.82062900 -0.26301300 0.00080400  
O 0.08173600 0.95395100 -0.02312200  
H -1.15638800 -0.49862300 -0.92406600  
H 1.36035600 -0.49760100 -0.91523500  
H 1.35494300 -0.45995300 0.93025000  
C -1.42247300 -0.54470400 1.27378000  
H -2.34384800 0.04645900 1.30064100  
H -1.69461300 -1.60395700 1.32972300  
H -0.81703400 -0.29172900 2.15056200

TS1Co\_mn15.log

SCF (MN15) = -2882.214563  
E(SCF)+ZPE(0 K)= -2882.170052  
H(298 K)= -2882.169107  
G(298 K)= -2882.290791  
Lowest Frequency = -549.8931cm-1

Co 5.11489800 7.68732600 21.31674400  
O 4.51288200 5.97440100 21.93473500  
O 3.70031400 8.50212100 22.30696700  
O 3.65680900 4.09496900 23.55605100  
O 6.42031200 7.83646400 22.71821700  
O 1.28763600 8.88522500 23.21970100  
O 0.44421000 7.33827800 25.40435200  
O 1.46729500 4.56670800 25.27925300  
O 5.30472100 7.08910300 24.53718300  
N 5.73307900 9.34283800 20.64846000  
N 6.49936200 6.91050200 20.29699400  
C 3.14508600 9.62810400 21.98421100  
C 1.83239100 9.90622800 22.49825700  
C 5.33166700 4.99235700 22.16893700  
C 4.91785000 3.94842000 23.06422500  
C 7.06259700 5.78862300 20.56612400  
H 7.96055800 5.51829800 20.00025900  
C 3.09678400 11.87082600 20.95323000  
H 3.60135400 12.62102900 20.34748700  
C 6.32911100 7.43796000 23.94294800  
C 7.04806300 9.19663900 20.03997200  
H 7.79579300 9.15869400 20.84091500  
H 7.26986500 10.03103400 19.36579300  
C 7.44193900 3.74066700 21.86626800  
H 8.40934500 3.66590300 21.37355900  
C 1.21350800 11.12223300 22.26278500  
H 0.22987900 11.32391900 22.67692100  
C 3.75030700 10.63408200 21.18593000  
C 7.03775500 2.78633600 22.77574700  
H 7.68013400 1.94863500 23.02933300  
C 5.06078900 10.43620500 20.61489500  
H 5.51180100 11.29491500 20.10577000  
C 3.11156400 3.07679300 24.37914100  
H 3.63147200 3.05646100 25.34769500  
H 3.22442300 2.09597300 23.89664100  
C 6.60630000 4.84459500 21.55957400  
C 5.76053200 2.89315200 23.37274600  
H 5.44242600 2.13186300 24.07927900



|   |             |             |             |
|---|-------------|-------------|-------------|
| C | 0.01083900  | 9.06813000  | 23.80912800 |
| H | -0.71905900 | 9.38939700  | 23.05298100 |
| H | 0.06963200  | 9.83547800  | 24.59442000 |
| C | 1.84808600  | 12.11774300 | 21.48339000 |
| H | 1.34510000  | 13.06410900 | 21.30987500 |
| C | 0.10077200  | 4.89932700  | 25.44397300 |
| H | -0.40470400 | 4.12903400  | 26.04898300 |
| H | -0.38564800 | 4.94014400  | 24.45712900 |
| C | 7.01413800  | 7.85372600  | 19.31522700 |
| H | 6.30826700  | 7.90359900  | 18.47716100 |
| H | 8.00163900  | 7.55068000  | 18.95046600 |
| C | -0.00985800 | 6.23179100  | 26.16508900 |
| H | -1.05824500 | 6.38820800  | 26.46344500 |
| H | 0.60656600  | 6.20438500  | 27.06932800 |
| C | -0.44566700 | 7.74334400  | 24.37798100 |
| H | -1.46023900 | 7.87122000  | 24.78690800 |
| H | -0.47351800 | 6.99538100  | 23.57360600 |
| C | 1.63798200  | 3.35820300  | 24.56377300 |
| H | 1.14917600  | 3.43948200  | 23.58124000 |
| H | 1.18770100  | 2.52081200  | 25.12030900 |
| C | 7.67861100  | 7.38067100  | 24.64520700 |
| H | 7.54809500  | 7.42058500  | 25.72869400 |
| H | 8.33697700  | 8.18438200  | 24.30700300 |
| H | 8.15038700  | 6.42487100  | 24.38339300 |
| K | 2.72479300  | 6.63057700  | 23.90945000 |
| O | 0.77542900  | 5.54695800  | 22.23019300 |
| C | 0.58848900  | 4.99586800  | 21.13550900 |
| O | 0.97050300  | 5.38198000  | 19.98938900 |
| C | 2.37094700  | 6.85162600  | 20.06194000 |
| C | 3.51689600  | 6.39191000  | 19.28069800 |
| H | 2.40509100  | 6.76240000  | 21.13901800 |
| H | 1.69372300  | 7.56312800  | 19.60307400 |
| O | 3.97527300  | 7.64748500  | 19.76616700 |
| H | 4.05627500  | 5.54348000  | 19.71190700 |
| C | 3.41710200  | 6.34174200  | 17.77554100 |
| H | 2.88010000  | 5.43968800  | 17.46295900 |
| H | 2.88213200  | 7.22118300  | 17.40073800 |
| H | 4.41925200  | 6.32175200  | 17.33285200 |
| O | -0.11993400 | 3.82549700  | 21.17667900 |
| C | -0.34618400 | 3.14697700  | 19.94635900 |
| H | 0.59981600  | 2.86945400  | 19.47128000 |
| H | -0.91373900 | 2.24851000  | 20.19476500 |
| H | -0.92143500 | 3.76957500  | 19.25428000 |

TS1K\_mn15.log

SCF (MN15) = -2882.192475  
E(SCF)+ZPE(0 K)= -2882.147970  
H(298 K)= -2882.147026  
G(298 K)= -2882.268018  
Lowest Frequency = -554.5235cm-1

|    |             |             |             |
|----|-------------|-------------|-------------|
| Co | 0.01974600  | -0.28348300 | -0.04661100 |
| O  | 0.08037900  | -0.02474500 | 1.84360400  |
| O  | 1.91522200  | -0.49322800 | -0.05184800 |
| O  | 0.76138800  | -0.44264900 | 4.35257000  |
| O  | -0.32850300 | -2.12273400 | 0.07442300  |
| O  | 4.43589500  | -0.14419200 | 0.51318800  |
| O  | 5.43203100  | -1.23532700 | 2.92065600  |
| O  | 3.46300500  | -0.93323300 | 5.13228400  |
| O  | 1.01585700  | -2.80792000 | 1.76290200  |
| N  | -0.09451500 | -0.49452600 | -1.92635300 |
| N  | -1.86007300 | -0.10958500 | -0.08291100 |

|   |             |             |             |
|---|-------------|-------------|-------------|
| C | 2.68562900  | -0.20640100 | -1.05805700 |
| C | 4.08562700  | -0.01896600 | -0.79894200 |
| C | -0.85303600 | -0.45839500 | 2.63724600  |
| C | -0.53154000 | -0.70287300 | 4.01656400  |
| C | -2.63418600 | -0.38826500 | 0.90311000  |
| H | -3.71221400 | -0.41351700 | 0.71221400  |
| C | 3.17475100  | 0.18612500  | -3.44430000 |
| H | 2.80583700  | 0.25308500  | -4.46577000 |
| C | 0.13141700  | -2.98492600 | 0.92887000  |
| C | -1.46884300 | -0.75302900 | -2.33525400 |
| H | -1.68917300 | -1.81030200 | -2.14813800 |
| H | -1.61434100 | -0.52970200 | -3.39828000 |
| C | -3.17274300 | -1.12661900 | 3.17945200  |
| H | -4.19561100 | -1.27135100 | 2.83750600  |
| C | 4.96834400  | 0.25531100  | -1.82966600 |
| H | 6.02677300  | 0.38266200  | -1.62293100 |
| C | 2.25171000  | -0.09675500 | -2.40432800 |
| C | -2.82285300 | -1.38092500 | 4.48815600  |
| H | -3.55684300 | -1.73885100 | 5.20350500  |
| C | 0.87310100  | -0.34025200 | -2.75701000 |
| H | 0.63939700  | -0.39478400 | -3.82618100 |
| C | 1.16555400  | -0.57135700 | 5.70653700  |
| H | 1.10262400  | -1.62259600 | 6.02221300  |
| H | 0.51504200  | 0.03250200  | 6.35440300  |
| C | -2.20255300 | -0.67422400 | 2.24891800  |
| C | -1.48997600 | -1.16092400 | 4.90524700  |
| H | -1.22153000 | -1.35758400 | 5.93917600  |
| C | 5.80903800  | -0.05650100 | 0.86410100  |
| H | 6.24439600  | 0.87399800  | 0.47217200  |
| H | 6.35441100  | -0.91103100 | 0.43879600  |
| C | 4.51203100  | 0.36668200  | -3.16438200 |
| H | 5.22251800  | 0.58459400  | -3.95568600 |
| C | 4.80490700  | -0.48075900 | 5.18233900  |
| H | 5.17835900  | -0.52525700 | 6.21812300  |
| H | 4.84581300  | 0.56537400  | 4.84114300  |
| C | -2.34340100 | 0.11777900  | -1.43686100 |
| H | -2.19822200 | 1.17427900  | -1.68254400 |
| H | -3.40526500 | -0.13599200 | -1.52523800 |
| C | 5.67507800  | -1.37175700 | 4.31140700  |
| H | 6.73239300  | -1.15253400 | 4.52760800  |
| H | 5.48207500  | -2.42054400 | 4.55841500  |
| C | 5.92261600  | -0.02326100 | 2.37183300  |
| H | 6.98427400  | 0.10717500  | 2.63499300  |
| H | 5.34351900  | 0.82826000  | 2.75806100  |
| C | 2.58442400  | -0.06330400 | 5.82283300  |
| H | 2.65408500  | 0.94467600  | 5.38720200  |
| H | 2.85706500  | -0.01750400 | 6.88889600  |
| C | -0.59755600 | -4.31615200 | 0.83055400  |
| H | -1.52952900 | -4.23161700 | 1.40241300  |
| H | 0.01258200  | -5.11007000 | 1.26557600  |
| H | -0.85656600 | -4.55169900 | -0.20408900 |
| K | 2.68591600  | -0.88496600 | 2.50228700  |
| O | 0.11406800  | 1.72357100  | -0.45576100 |
| C | 0.94688600  | 2.61717700  | -0.75102100 |
| O | 1.98533000  | 2.95954500  | -0.12887900 |
| C | 2.28964300  | 2.19911800  | 1.58433200  |
| C | 3.57410400  | 2.68062900  | 2.10186300  |
| H | 2.23866400  | 1.19816600  | 1.18476900  |
| H | 1.39109900  | 2.60224600  | 2.04242000  |
| O | 3.32591700  | 1.82216900  | 3.16801200  |
| H | 4.43198900  | 2.38268200  | 1.46818100  |
| C | 3.66500900  | 4.15420800  | 2.45617000  |
| H | 3.72410400  | 4.77654100  | 1.55482000  |

H 2.78051000 4.45027300 3.03425800  
H 4.55622500 4.33897700 3.06739300  
O 0.71851000 3.36918100 -1.84999600  
C -0.45292200 3.11159900 -2.61717200  
H -1.35210200 3.27496100 -2.01499800  
H -0.42941500 3.81849900 -3.44676900  
H -0.45150900 2.08762000 -3.00357200

1\_prop\_Z\_pbe.log

SCF (PBE0) = -2689.84649604  
E(SCF)+ZPE(0 K)= -2689.290972  
H(298 K)= -2689.250404  
G(298 K)= -2689.364354  
Lowest Frequency = 19.7827cm-1

Co 2.475267 6.367359 23.131130  
K 5.798386 7.537114 22.053595  
O 1.592046 6.140216 21.448016  
O 3.165359 8.051616 22.622525  
O 4.004266 5.592684 22.305737  
O 4.623409 10.081830 21.947585  
O 3.259546 6.416730 24.878317  
O 5.917987 5.100550 20.630098  
O 8.056538 6.894151 20.491097  
O 7.139983 9.647076 20.772912  
O 5.347527 7.227063 24.614722  
O 0.490475 8.101828 21.176811  
N 1.759845 4.683815 23.639302  
N 0.944846 7.100952 23.954839  
C 4.101558 4.366865 21.917198  
C 5.170561 4.031799 21.020566  
C 2.845789 9.172333 23.175760  
C 3.639802 10.324209 22.858086  
C 0.907463 7.011227 20.812994  
C 0.820710 8.315900 24.338003  
H -0.076033 8.586288 24.902967  
C 3.484957 1.980405 21.889310  
H 2.819051 1.192394 22.232204  
C 4.404151 6.817375 25.296446  
C 0.669506 4.825471 24.588625  
H 1.101912 4.940947 25.588930  
H 0.013410 3.949175 24.579722  
C 1.511551 10.641544 24.637206  
H 0.665643 10.755939 25.310706  
C 5.383354 2.729237 20.611285  
H 6.206621 2.491171 19.946170  
C 3.249348 3.305608 22.326141  
C 2.326708 11.713253 24.351690  
H 2.150138 12.684056 24.803006  
C 2.146694 3.537314 23.216418  
H 1.600524 2.653868 23.560152  
C 5.455159 11.155777 21.550577  
H 6.093159 11.468764 22.388292  
H 4.850450 12.013765 21.228465  
C 1.753307 9.371869 24.062224  
C 3.397229 11.549950 23.448312  
H 4.029126 12.401937 23.220792  
C 7.020042 4.872845 19.771277  
H 6.702354 4.333075 18.869301  
H 7.784277 4.278788 20.290155  
C 4.535342 1.690608 21.048871  
H 4.718797 0.674150 20.716594

C 8.004606 9.235251 19.734518  
H 8.695629 10.049204 19.465952  
H 7.422170 8.986789 18.834210  
C -0.070870 6.097197 24.207159  
H -0.632233 5.936099 23.278838  
H -0.765639 6.416997 24.990479  
C 8.820989 8.050045 20.204312  
H 9.583788 7.823812 19.444718  
H 9.331204 8.308553 21.136880  
C 7.577706 6.208632 19.352601  
H 8.394791 6.034171 18.636994  
H 6.794521 6.786786 18.841616  
C 6.290717 10.704067 20.381560  
H 5.636471 10.378742 19.558399  
H 6.881963 11.562611 20.029038  
C 4.523153 6.782887 26.810826  
H 4.045146 7.681342 27.217009  
H 5.571961 6.782290 27.112650  
H 4.007482 5.915436 27.228806  
O 0.640124 6.550815 19.550796  
C -0.141601 7.407956 18.732921  
H 0.359723 8.367188 18.572225  
H -0.257709 6.887233 17.781154  
H -1.124445 7.592231 19.177216

RPO\_pbe.log

SCF (PBE0) = -192.927215339  
E(SCF)+ZPE(0 K)= -192.841078  
H(298 K)= -192.835751  
G(298 K)= -192.867421  
Lowest Frequency = 214.6233cm-1

C -0.642918 -0.268776 0.021495  
C 0.819261 -0.264049 0.000181  
O 0.084415 0.959242 -0.025386  
H -1.153763 -0.500484 -0.914508  
H 1.351585 -0.502895 -0.919158  
H 1.362077 -0.454691 0.925365  
C -1.420747 -0.543688 1.274224  
H -2.342925 0.045966 1.293459  
H -1.694159 -1.602824 1.322070  
H -0.827725 -0.295923 2.159366

TS1Co\_pbe.log

SCF (PBE0) = -2882.76293296  
E(SCF)+ZPE(0 K)= -2882.119882  
H(298 K)= -2882.074556  
G(298 K)= -2882.196923  
Lowest Frequency = -509.9148cm-1

Co 5.109134 7.650237 21.284003  
O 4.553837 5.963097 21.961885  
O 3.637402 8.431934 22.191131  
O 3.629015 4.043098 23.458078  
O 6.339200 7.946464 22.714549  
O 1.354630 8.919452 23.314284  
O 0.493536 7.307517 25.457044  
O 1.456378 4.505058 25.232764  
O 5.204780 7.326299 24.563313  
N 5.694107 9.303632 20.568609  
N 6.554033 6.889764 20.330048

C 3.160659 9.615069 21.994586  
 C 1.907889 9.943694 22.614855  
 C 5.335956 4.944992 22.129486  
 C 4.878700 3.866957 22.958029  
 C 7.099289 5.755840 20.575536  
 H 8.004385 5.490343 20.021981  
 C 3.191717 11.913577 21.103289  
 H 3.702410 12.670310 20.512979  
 C 6.208135 7.734310 23.976243  
 C 7.008882 9.192033 19.959703  
 H 7.759960 9.277126 20.753533  
 H 7.176633 9.982574 19.221392  
 C 7.392603 3.635156 21.756342  
 H 8.358870 3.549816 21.265702  
 C 1.351751 11.201922 22.484017  
 H 0.411459 11.436505 22.971753  
 C 3.785226 10.634014 21.226809  
 C 6.945431 2.644359 22.599935  
 H 7.552785 1.768046 22.801157  
 C 5.050606 10.412652 20.587129  
 H 5.502131 11.273269 20.085005  
 C 3.054701 3.016464 24.249353  
 H 3.582463 2.942748 25.209993  
 H 3.126907 2.050853 23.731769  
 C 6.605875 4.785924 21.513017  
 C 5.675462 2.762829 23.199956  
 H 5.326652 1.972441 23.856049  
 C 0.105190 9.120296 23.951631  
 H -0.631369 9.510372 23.236569  
 H 0.215883 9.838755 24.775084  
 C 1.995492 12.198007 21.720221  
 H 1.541610 13.179331 21.629203  
 C 0.099343 4.871933 25.397029  
 H -0.434030 4.098446 25.972254  
 H -0.377635 4.958532 24.410691  
 C 7.083737 7.807370 19.337473  
 H 6.438972 7.764895 18.452371  
 H 8.106126 7.541670 19.050359  
 C 0.014646 6.176530 26.162188  
 H -1.030800 6.337301 26.465377  
 H 0.626062 6.106910 27.067222  
 C -0.389101 7.789075 24.459477  
 H -1.394782 7.935442 24.881630  
 H -0.453609 7.080928 23.622361  
 C 1.595854 3.332910 24.455111  
 H 1.104120 3.472868 23.482544  
 H 1.128668 2.477804 24.968134  
 C 7.485435 8.010510 24.751506  
 H 7.264920 8.159712 25.809904  
 H 8.014075 8.877225 24.348190  
 H 8.146647 7.142330 24.653018  
 K 2.715228 6.591154 23.899065  
 O 0.695276 5.626416 22.149492  
 C 0.526351 5.016591 21.087128  
 O 0.946395 5.313005 19.933019  
 C 2.401167 6.744217 19.961314  
 C 3.563839 6.209372 19.271847  
 H 2.369593 6.716679 21.037720  
 H 1.761072 7.435484 19.429137  
 O 4.021835 7.485933 19.703035  
 H 4.056529 5.381095 19.783985  
 C 3.545534 6.052254 17.775842  
 H 3.004139 5.140778 17.503100

H 3.055283 6.907834 17.301434  
 H 4.567300 5.974093 17.391330  
 O -0.214248 3.866020 21.190866  
 C -0.405592 3.101837 20.008865  
 H 0.550510 2.771194 19.592077  
 H -0.997966 2.234749 20.306433  
 H -0.944921 3.674140 19.248263

TS1K\_pbe.log

SCF (PBE0) = -2882.096551  
 E(SCF)+ZPE(0 K)= -2882.052103  
 H(298 K)= -2882.051159  
 G(298 K)= -2882.173904  
 Lowest Frequency = -505.6722cm-1

Co 0.02738598 -0.26872547 -0.06409844  
 O 0.08004333 -0.09994441 1.82192366  
 O 1.91646681 -0.33166988 -0.03982410  
 O 0.71543573 -0.37654935 4.33654705  
 O -0.19722853 -2.13496374 -0.02548313  
 O 4.44551496 -0.21167949 0.51462427  
 O 5.40963386 -1.26029560 2.98188793  
 O 3.41326304 -0.86148245 5.17645830  
 O 1.26319153 -2.88354829 1.52539315  
 N -0.06896209 -0.42905799 -1.95127075  
 N -1.86438650 -0.18487841 -0.11693665  
 C 2.70832699 -0.23049987 -1.05857951  
 C 4.11811991 -0.16447921 -0.80193467  
 C -0.88344963 -0.42805737 2.62079713  
 C -0.58475579 -0.59426544 4.01549915  
 C -2.64908126 -0.40842694 0.87223886  
 H -3.72387680 -0.44341086 0.67322589  
 C 3.24425157 -0.09170692 -3.45925053  
 H 2.89111813 -0.07530704 -4.48711608  
 C 0.37198319 -3.04110827 0.69530380  
 C -1.42339525 -0.71438185 -2.39768076  
 H -1.58673973 -1.79390262 -2.30376581  
 H -1.56960742 -0.42111445 -3.44219535  
 C -3.22849480 -0.95878630 3.18025676  
 H -4.25356949 -1.08677022 2.84177176  
 C 5.02604164 -0.06255237 -1.83928982  
 H 6.08965830 -0.02074128 -1.63081162  
 C 2.29351856 -0.20097968 -2.41553699  
 C -2.90096103 -1.13681841 4.50426602  
 H -3.65572442 -1.41418282 5.23271267  
 C 0.91222572 -0.35296977 -2.77415240  
 H 0.68982931 -0.43063490 -3.84232924  
 C 1.11161143 -0.44028856 5.69681445  
 H 1.02493752 -1.47058132 6.06797448  
 H 0.47219545 0.21039167 6.30790327  
 C -2.23754014 -0.61067899 2.23119240  
 C -1.56717395 -0.95011376 4.92082507  
 H -1.31657781 -1.09203328 5.96676284  
 C 5.81724870 -0.19441080 0.87766192  
 H 6.31607313 0.67876244 0.43653790  
 H 6.30952000 -1.10638473 0.51358244  
 C 4.58875784 -0.01837590 -3.17927602  
 H 5.31933912 0.06333207 -3.97723014  
 C 4.75422766 -0.40530023 5.20591074  
 H 5.12876919 -0.40752623 6.24188396  
 H 4.79482371 0.62366579 4.82131178  
 C -2.36618161 0.02505905 -1.46333340

|   |             |             |             |   |             |            |             |
|---|-------------|-------------|-------------|---|-------------|------------|-------------|
| H | -2.34026253 | 1.09743226  | -1.67619834 | O | 1.76089914  | 3.07470566 | 0.08400879  |
| H | -3.39621118 | -0.33100903 | -1.56405236 | C | 2.23666898  | 2.25004223 | 1.70875040  |
| C | 5.62872944  | -1.32751330 | 4.38012727  | C | 3.57067722  | 2.69087106 | 2.11768322  |
| H | 6.68202925  | -1.10073950 | 4.60475563  | H | 2.13988863  | 1.26338525 | 1.28781589  |
| H | 5.43558188  | -2.36669375 | 4.66409805  | H | 1.39961841  | 2.64236316 | 2.27475251  |
| C | 5.91851104  | -0.08259388 | 2.37777868  | O | 3.41308372  | 1.81476941 | 3.18150767  |
| H | 6.98018755  | 0.04605439  | 2.63819205  | H | 4.35593200  | 2.38742854 | 1.40020772  |
| H | 5.34883894  | 0.79363933  | 2.71874461  | C | 3.74575108  | 4.15001129 | 2.48748693  |
| C | 2.53212718  | 0.05351749  | 5.79990197  | H | 3.74790398  | 4.78843608 | 1.59650638  |
| H | 2.62038810  | 1.03455770  | 5.31135349  | H | 2.93532905  | 4.47366411 | 3.15064381  |
| H | 2.78433939  | 0.15707490  | 6.86661978  | H | 4.69664138  | 4.28901452 | 3.01415155  |
| C | -0.21284052 | -4.41925344 | 0.44416942  | O | 0.40717498  | 3.57318113 | -1.52850994 |
| H | 0.49930734  | -5.19065818 | 0.74186188  | C | -0.72244479 | 3.26409509 | -2.33587847 |
| H | -0.49785428 | -4.54681639 | -0.60212755 | H | -1.63696175 | 3.25416856 | -1.73656244 |
| H | -1.11689551 | -4.52709785 | 1.05357827  | H | -0.77743603 | 4.05959743 | -3.07919587 |
| K | 2.68469762  | -0.89644147 | 2.52775306  | H | -0.59568039 | 2.29980900 | -2.83350228 |
| O | -0.00778127 | 1.72103755  | -0.35543517 |   |             |            |             |
| C | 0.73612292  | 2.71082907  | -0.54199386 |   |             |            |             |

## References

1. Deacy, A. C.; Moreby, E.; Phanopoulos, A.; Williams, C. K. Co(III)/Alkali-Metal(I) Heterodinuclear Catalysts for the Ring-Opening Copolymerization of CO<sub>2</sub> and Propylene Oxide. *J. Am. Chem. Soc.*, **2020**, *142*, 19150-19160
2. Gaussian 16, Revision C.01, Frisch, M. J.; Trucks, G. W.; Schlegel, H. B.; Scuseria, G. E.; Robb, M. A.; Cheeseman, J. R.; Scalmani, G.; Barone, V.; Petersson, G. A.; Nakatsuji, H.; Li, X.; Caricato, M.; Marenich, A. V.; Bloino, J.; Janesko, B. G.; Gomperts, R.; Mennucci, B.; Hratchian, H. P.; Ortiz, J. V.; Izmaylov, A. F.; Sonnenberg, J. L.; Williams-Young, D.; Ding, F.; Lipparini, F.; Egidi, F.; Goings, J.; Peng, B.; Petrone, A.; Henderson, T.; Ranasinghe, D.; Zakrzewski, V. G.; Gao, J.; Rega, N.; Zheng, G.; Liang, W.; Hada, M.; Ehara, M.; Toyota, K.; Fukuda, R.; Hasegawa, J.; Ishida, M.; Nakajima, T.; Honda, Y.; Kitao, O.; Nakai, H.; Vreven, T.; Throssell, K.; Montgomery, J. A., Jr.; Peralta, J. E.; Ogliaro, F.; Bearpark, M. J.; Heyd, J. J.; Brothers, E. N.; Kudin, K. N.; Staroverov, V. N.; Keith, T. A.; Kobayashi, R.; Normand, J.; Raghavachari, K.; Rendell, A. P.; Burant, J. C.; Iyengar, S. S.; Tomasi, J.; Cossi, M.; Millam, J. M.; Klene, M.; Adamo, C.; Cammi, R.; Ochterski, J. W.; Martin, R. L.; Morokuma, K.; Farkas, O.; Foresman, J. B.; Fox, D. J. Gaussian, Inc., Wallingford CT, 2016.
3. Chai, J.-D.; Head-Gordon, M. Systematic Optimization of Long-Range Corrected Hybrid Density Functionals. *J. Chem. Phys.* **2007**, *128*, 084106.
4. Alipour, M.; Fallahzadeh, P. First Principles Optimally Tuned Range-Separated Density Functional Theory for Prediction of Phosphorus-Hydrogen Spin-Spin Coupling Constants. *Phys. Chem. Chem. Phys.* **2016**, *18*, 18431-18440
5. Becke, A. D. Density-Functional Thermochemistry. III. The Role of Exact Exchange. *J. Chem. Phys.* **1993**, *98*, 5648-5652
6. Lee, C.; Yang, W.; Parr, R. G. Development of the Colle-Salvetti Correlation-Energy Formula into a Functional of the Electron Density. *Phys. Rev. B* **1988**, *37*, 785-789
7. Grimme, S.; Ehrlich, S.; Goerigk, L. Effect of the Damping Function in Dispersion Corrected Density Functional Theory. *J. Comp. Chem.* **2011**, *32*, 1456-1465
8. Becke, A. D.; Johnson, E. R. A Density-Functional Model of the Dispersion Interaction. *J. Chem. Phys.* **2005**, *123*, 154101
9. Zhao, Y.; Truhlar, D. G. The M06 Suite of Density Functionals for Main Group Thermochemistry, Thermochemical Kinetics, Noncovalent Interactions, Excited States, and Transition Elements: Two New Functionals and Systematic Testing of Four M06-Class Functionals and 12 Other Functionals. *Theor. Chem. Account.* **2008**, *120*, 215-241
10. Grimme, S.; Antony, J.; Ehrlich, S.; Krieg, H. A Consistent and Accurate *Ab Initio* Parametrization of Density Functional Dispersion Correction (DFT-D) for the 94 Elements H-Pu. *J. Chem. Phys.* **2010**, *132*, 154104
11. Perdew, J. P.; Burke, K.; Ernzerhof, M. Generalized Gradient Approximation Made Simple. *Phys. Rev. Lett.* **1996**, *77*, 3865-3868
12. Adamo, C.; Barone, V. Toward Reliable Density Functional Methods Without Adjustable Parameters: The PBE0 Model. *J. Chem. Phys.* **1999**, *110*, 6158-6170
13. *NBO 6.0*. Glendening, E. D.; Badenhoop, J. K.; Reed, A. E.; Carpenter, J. E.; Bohmann, J. A.; Morales, C. M.; Landis, C. R.; Weinhold, F. Theoretical Chemistry Institute, University of Wisconsin, Madison (2013)
14. AIMAll (Version 13.10.19), Keith, T. A. TK Gristmill Software, Overland Park, KS, USA (2013) (aim.tkgristmill.com)
15. Johnson, E. R.; Keinan, S.; Mori-Sánchez, P.; Contreras-García, J.; Cohen, A. J.; Yang, W. Revealing Noncovalent Interactions. *J. Am. Chem. Soc.* **2010**, *132*, 6498-6506
16. Barone, V.; Cossi, M. Quantum Calculation of Molecular Energies and Energy Gradients in Solution by a Conductor Solvent Model. *J. Phys. Chem. A.*, **1998**, *102*, 1995-2001
17. Luchini, G.; Alegre-Requena, J. V.; Funes-Ardoiz, I. and Paton, R.S. Goodvibes:automated thermochemistry for heterogeneous computational chemistry data. *F1000Research*, **2020**, *9*, 291
18. Foltran, S.; Cloutet, E.; Cramail, H. and Tassaing, T. In situ FTIR investigation of the solubility and swelling of model epoxides in supercritical CO<sub>2</sub>. *J. Supercrit. Fluids*, **2012**, *63*, 52-58
